# Supplementary material for: A Multifield Study on Dimethyl Acetylenedicarboxylate: A Reagent Able to Build a New Cycle on Diaminoimidazoles
Source: MDPI journal article supplement (doi:10.3390/molecules27103326), 2022-05-22
Supplement: s1 [file s1]

## Supporting Information

### A MULTIFIELD STUDY ON DIMETHYL ACETYLENEDICARBOXYLATE: A REAGENT ABLE TO BUILD A NEW CYCLE ON DIAMINOIMIDAZOLES

Dmitrii Yu. Vandyshev \*, Oleg N. Burov, Anton V. Lisovin, Daria A. Mangusheva, Mikhail A. Potapov, Tatiana N. Ilyinova, Khidmet S. Shikhaliev, Athina Geronikaki\* and Domenico Spinelli\*

#### Content

|                                                                                                                                                |     |
|------------------------------------------------------------------------------------------------------------------------------------------------|-----|
| Discussion of the results of quantum chemical calculations when alcohol molecule was included in the processes shown in Schemes S1 and S2..... | S1  |
| Results of HPLC-MS analysis in assessing the conversion of the studied process.....                                                            | S3  |
| Spectral data of the obtained compounds .....                                                                                                  | S17 |
| DFT calculation .....                                                                                                                          | S41 |

#### Discussion of the results of quantum chemical calculations when alcohol molecules were included in the processes shown in Schemes S1 and S2

When alcohol molecules were included in the formation of covalent adduct **59** in **Scheme 11**, a similar picture was observed (**Scheme S1**). The alcohol molecule is coordinated in zwitterionic associate **65** with a negatively charged double bond carbon atom. Structure **65** was 38.5 kcal/mol higher in energy than the initial reagents (**Figure S1**). As in the previous cases, we observe the destabilization of the zwitterionic complex in comparison with a similar bimolecular processes. Associate **65** is 5.1 kcal/mol higher in energy than structure **58**.

Scheme S1.

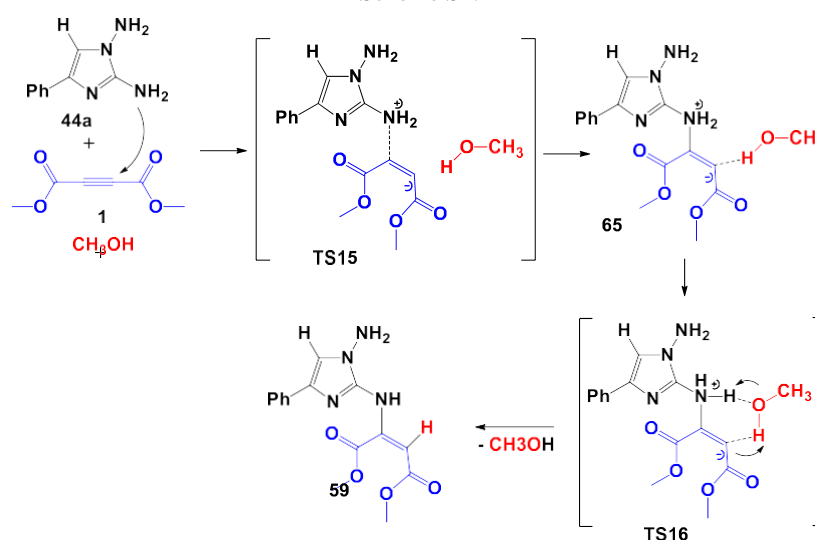

The inclusion of an alcohol molecule at the molecular level did not affect the possibility of further cyclization, and the covalent product is still the final stage of the studied process.

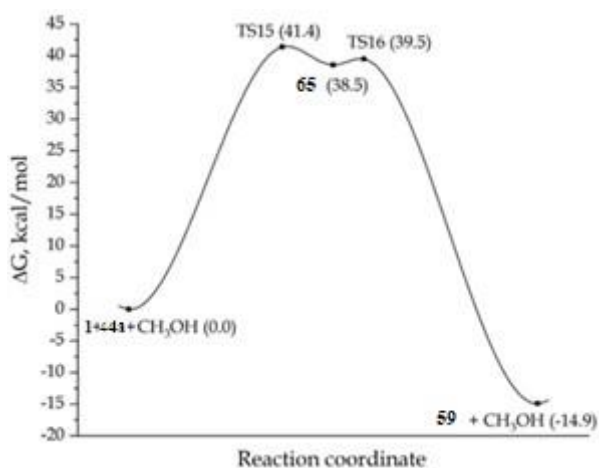

**Figure S1.** The MEP for the trimolecular reaction of the formation of adduct **59**. The total energy of the starting reagents is taken as the reference point.

The transition from a bimolecular process in **Scheme 12** to a trimolecular process involving an alcohol molecule in **Scheme S2** has a tendency similar to the three previously described cases. In particular, the formation of zwitterionic complex **66** becomes less advantageous in comparison with the bimolecular process (**Figure S2**, **Figure 6**.), and the proton transfer during the formation of covalent adduct **61** from structure **66** becomes barrier-free with the involvement of alcohol molecules.

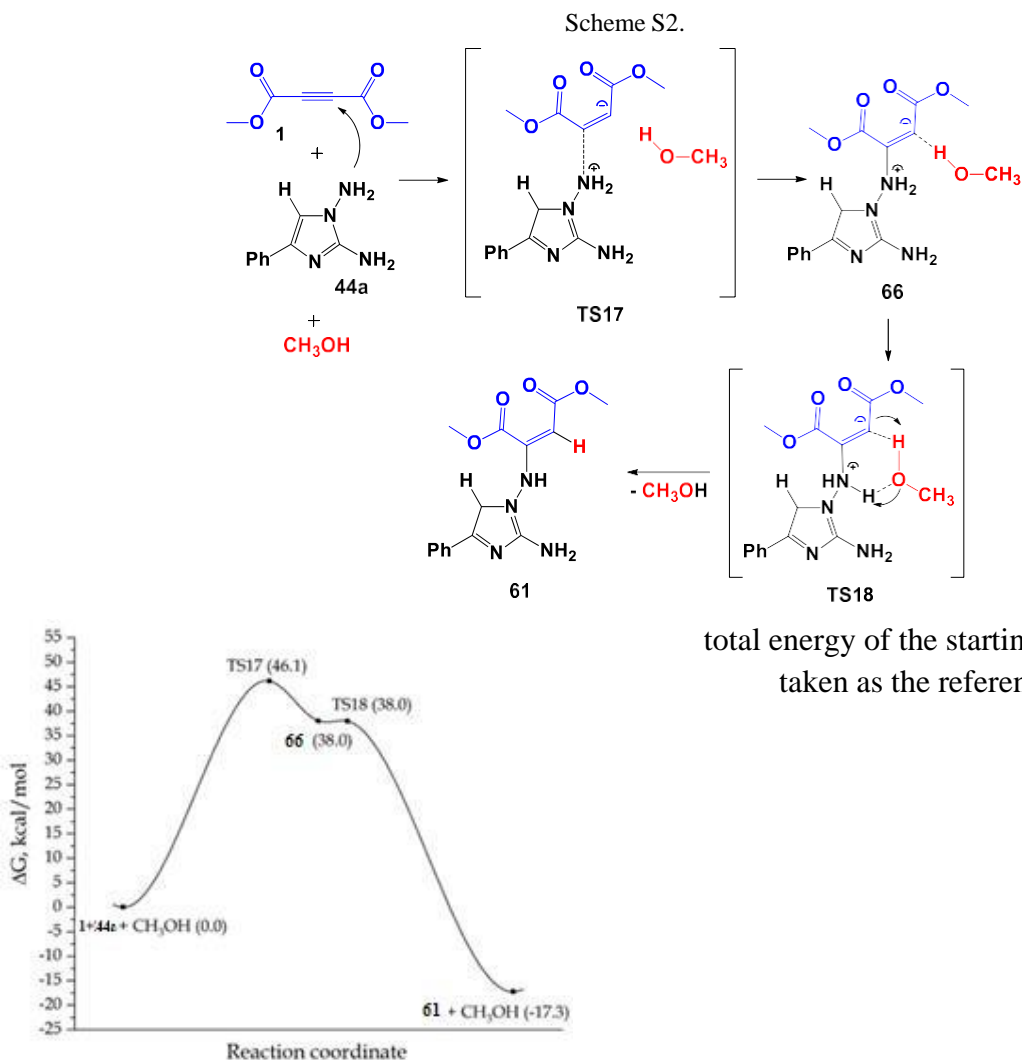

total energy of the starting reagents was taken as the reference point.

**Figure S2.** MEP for the trimolecular reaction of the formation of product **61**. The

## Results of HPLC-MS analysis in assessing the conversion of the studied process

**Table S1. Start of the reaction 0 minutes (independent of the solvent).**

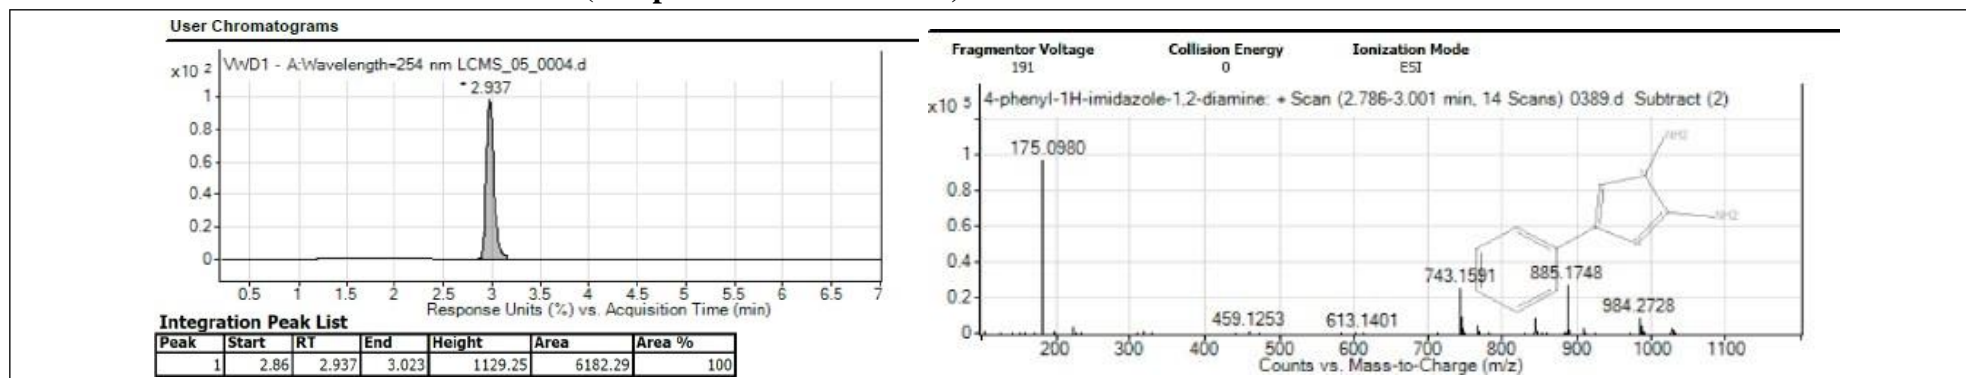

**Table S2. Conducting the reaction in benzene.**

**60 minutes**

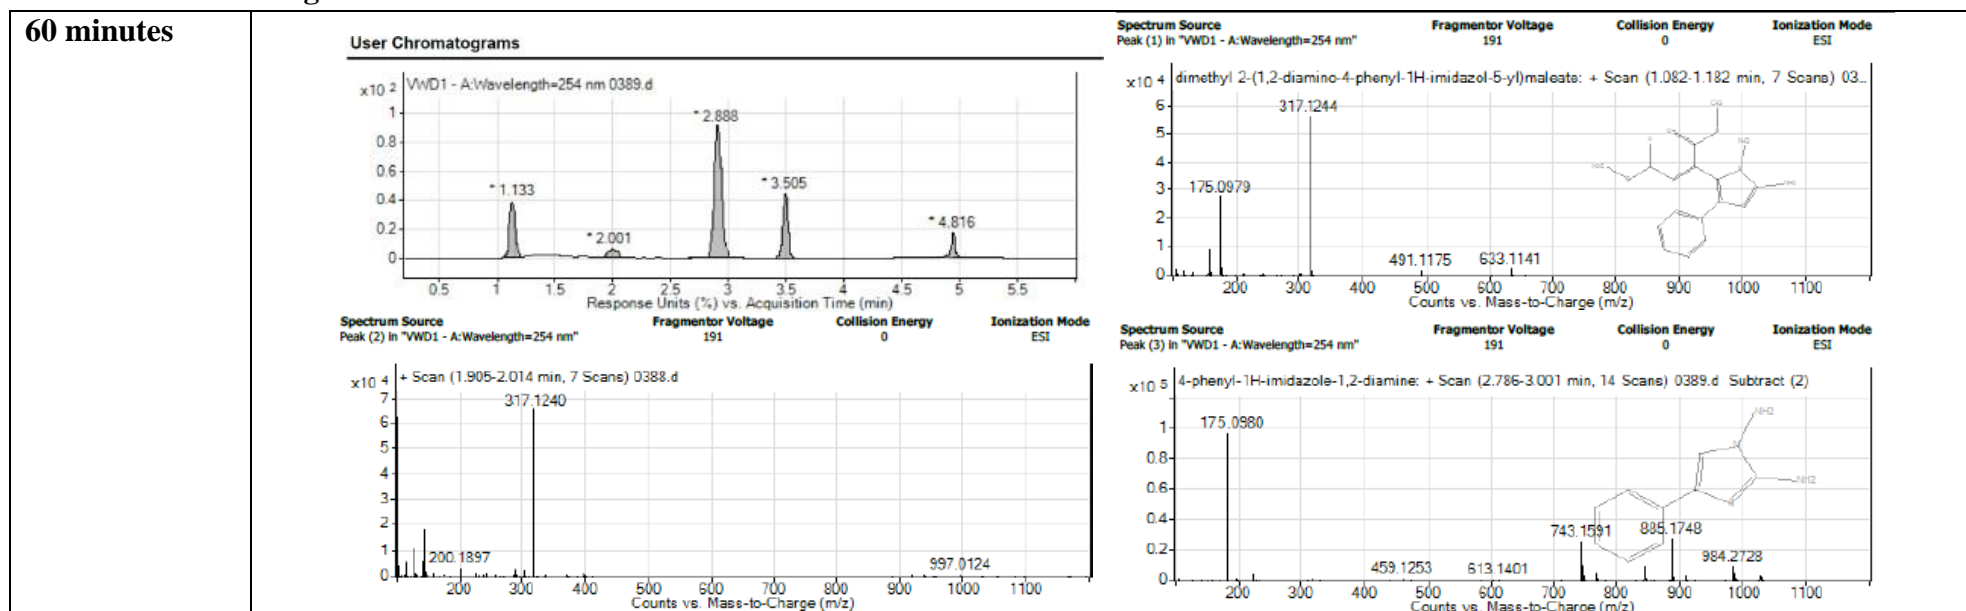

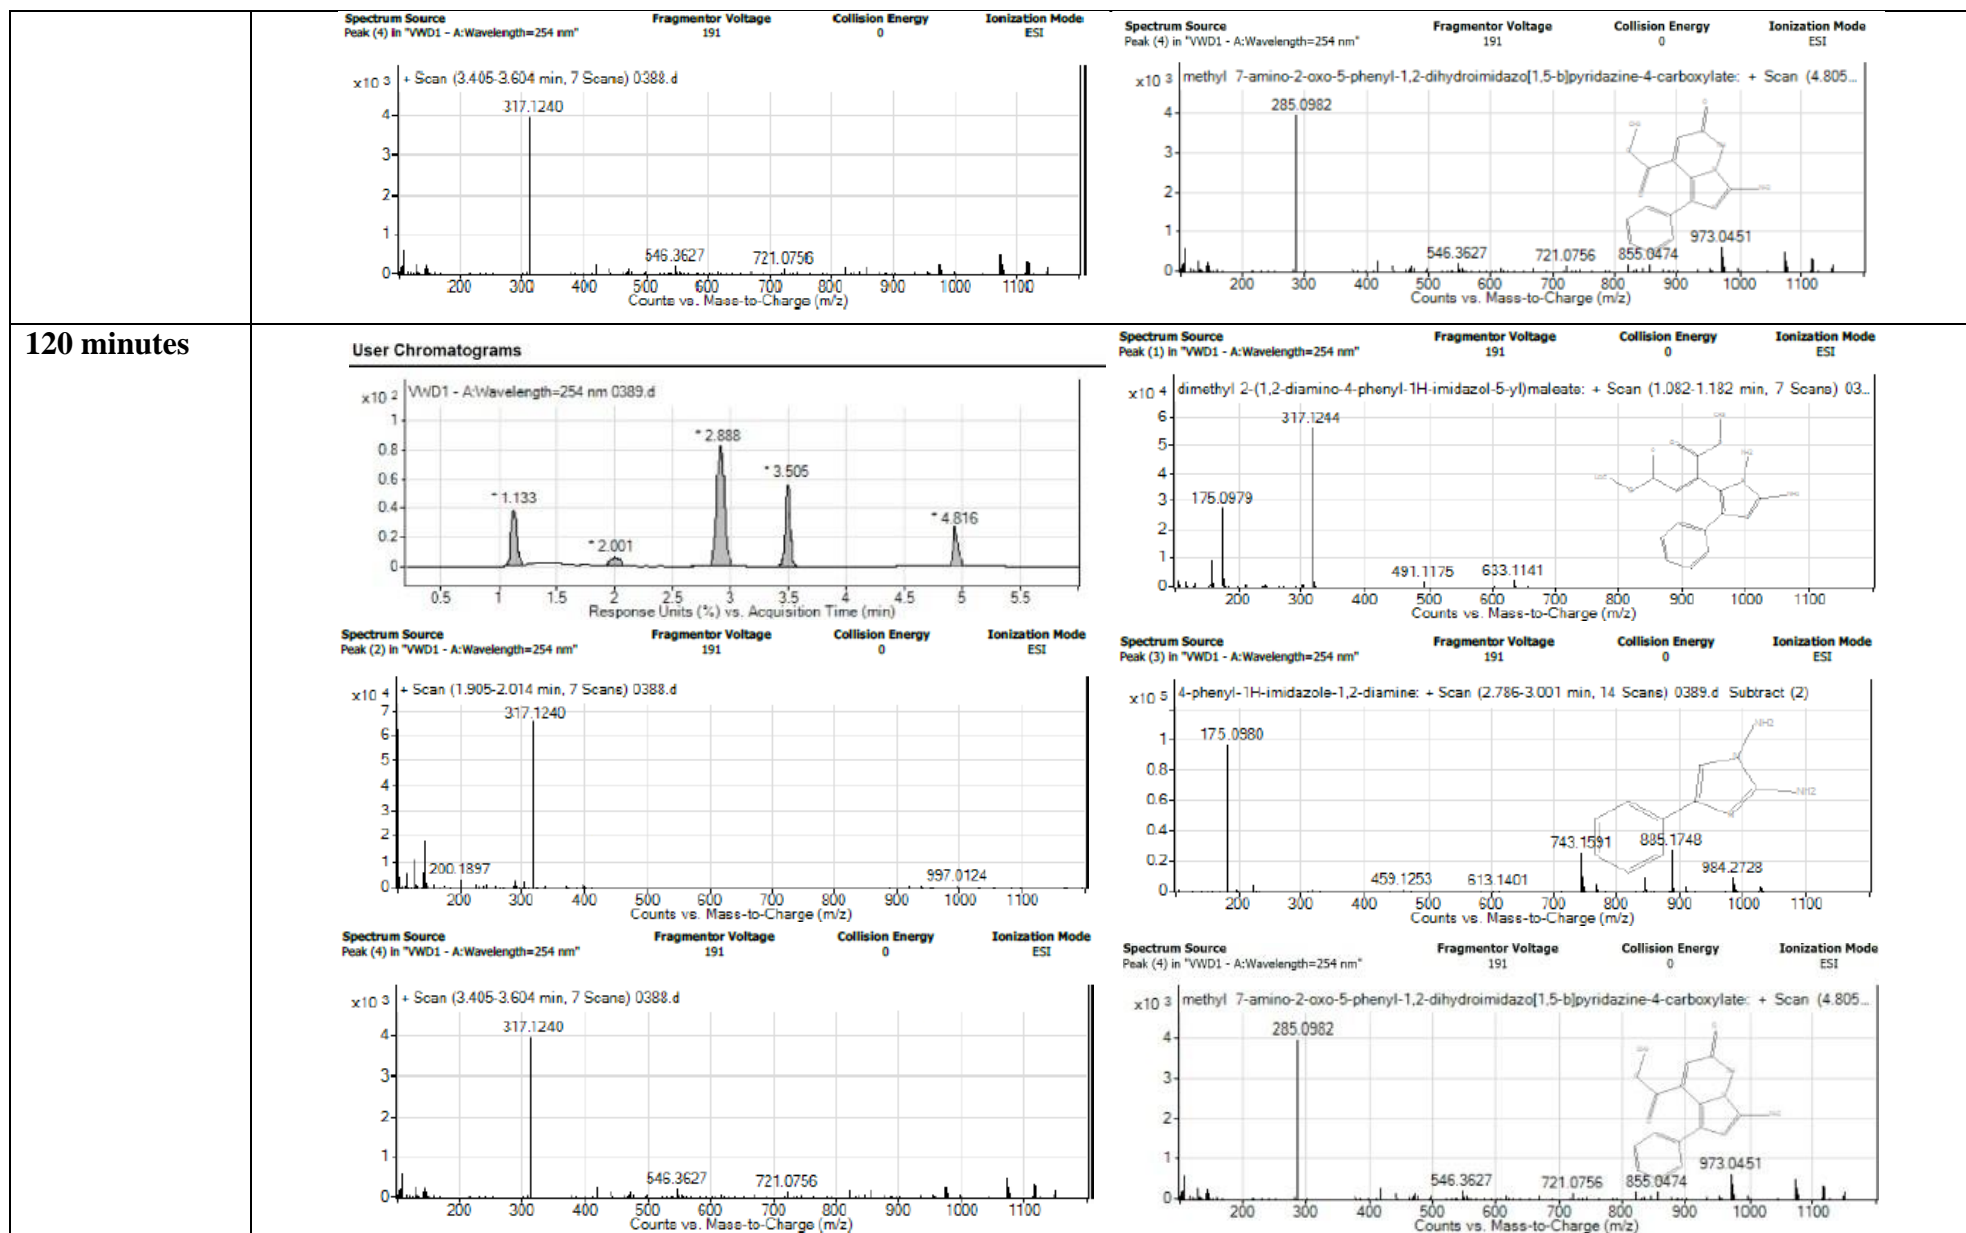

**Table S3. Conducting the reaction in 1,4-dioxane.**

**60 minutes**

**User Chromatograms**

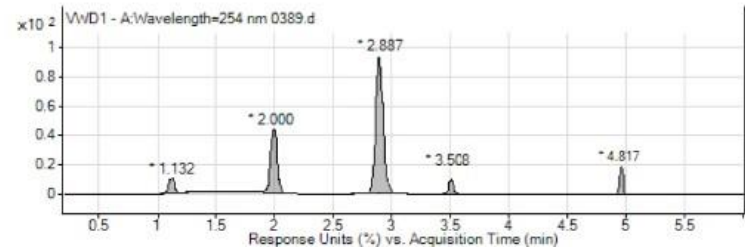

Spectrum Source: Peak (2) in "VWD1 - A:Wavelength=254 nm"  
 Fragmentor Voltage: 191  
 Collision Energy: 0  
 Ionization Mode: ESI

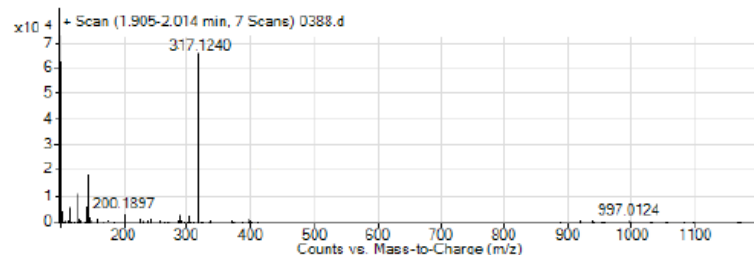

Spectrum Source: Peak (4) in "VWD1 - A:Wavelength=254 nm"  
 Fragmentor Voltage: 191  
 Collision Energy: 0  
 Ionization Mode: ESI

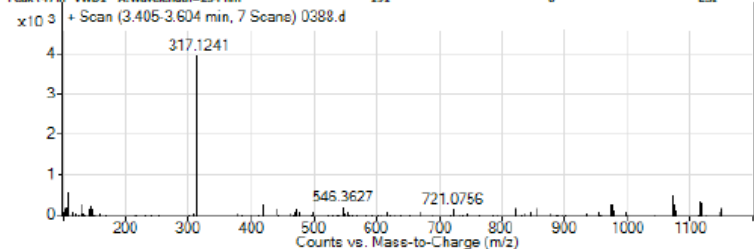

Spectrum Source: Peak (1) in "VWD1 - A:Wavelength=254 nm"  
 Fragmentor Voltage: 191  
 Collision Energy: 0  
 Ionization Mode: ESI

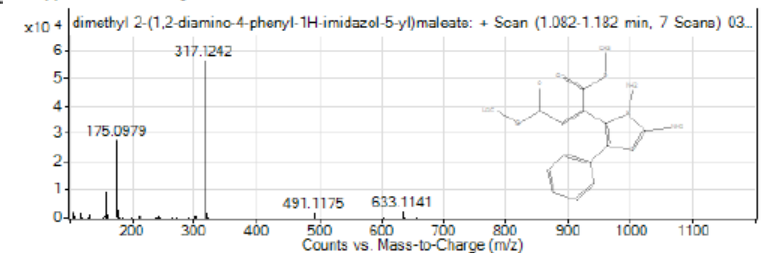

Spectrum Source: Peak (3) in "VWD1 - A:Wavelength=254 nm"  
 Fragmentor Voltage: 191  
 Collision Energy: 0  
 Ionization Mode: ESI

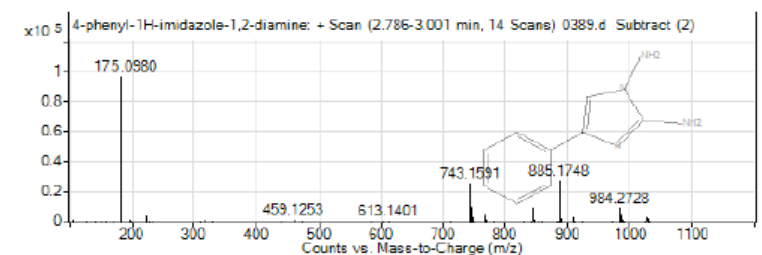

Spectrum Source: Peak (4) in "VWD1 - A:Wavelength=254 nm"  
 Fragmentor Voltage: 191  
 Collision Energy: 0  
 Ionization Mode: ESI

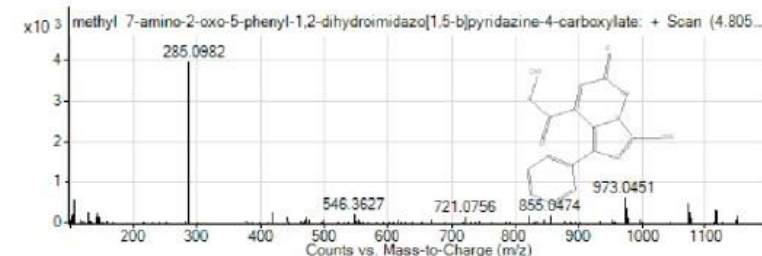

120 minutes

# User Chromatograms

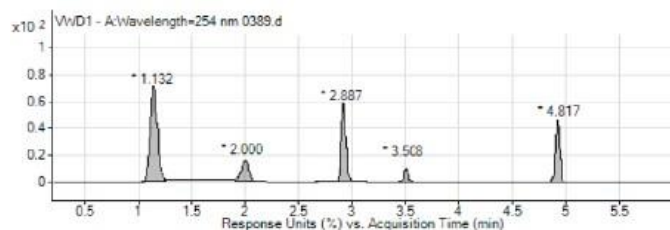

Spectrum Source: Peak (2) in "VWD1 - A:Wavelength=254 nm"  
 Fragmentor Voltage: 191  
 Collision Energy: 0  
 Ionization Mode: ESI

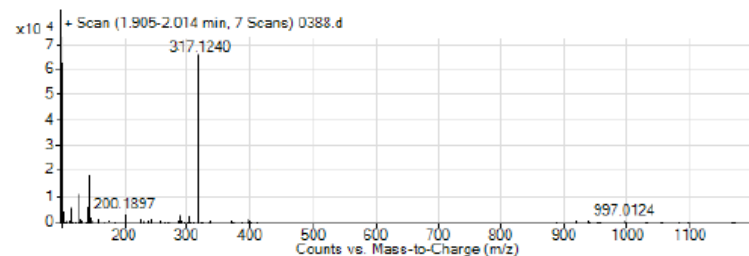

Spectrum Source: Peak (4) in "VWD1 - A:Wavelength=254 nm"  
 Fragmentor Voltage: 191  
 Collision Energy: 0  
 Ionization Mode: ESI

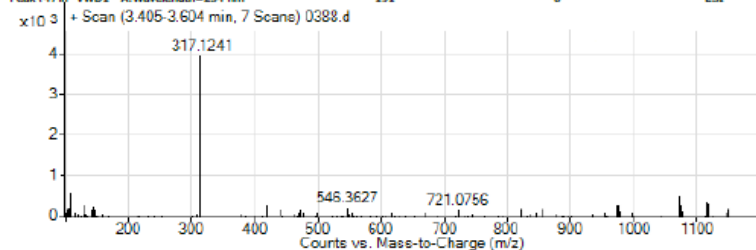

Spectrum Source: Peak (1) in "VWD1 - A:Wavelength=254 nm"  
 Fragmentor Voltage: 191  
 Collision Energy: 0  
 Ionization Mode: ESI

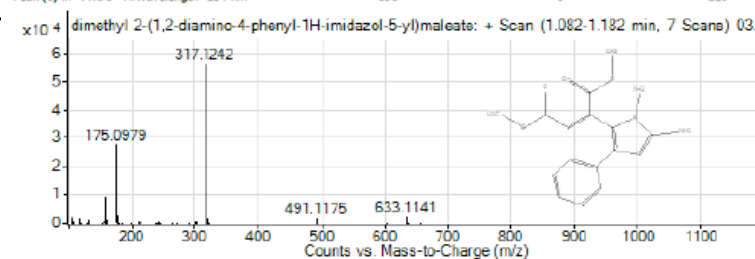

Spectrum Source: Peak (3) in "VWD1 - A:Wavelength=254 nm"  
 Fragmentor Voltage: 191  
 Collision Energy: 0  
 Ionization Mode: ESI

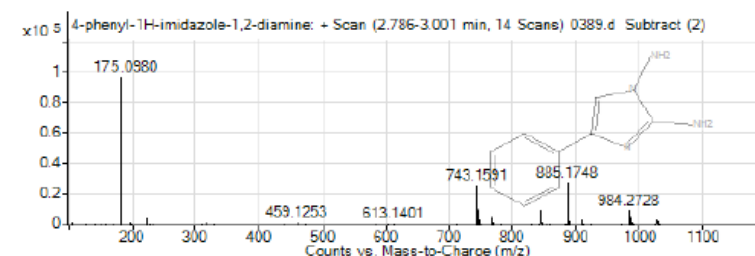

Spectrum Source: Peak (4) in "VWD1 - A:Wavelength=254 nm"  
 Fragmentor Voltage: 191  
 Collision Energy: 0  
 Ionization Mode: ESI

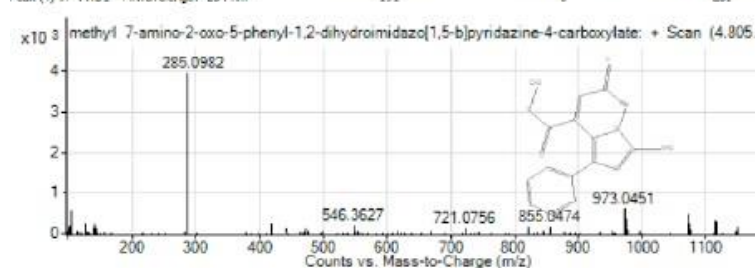

Table S4. Conducting the reaction in methylene chloride.

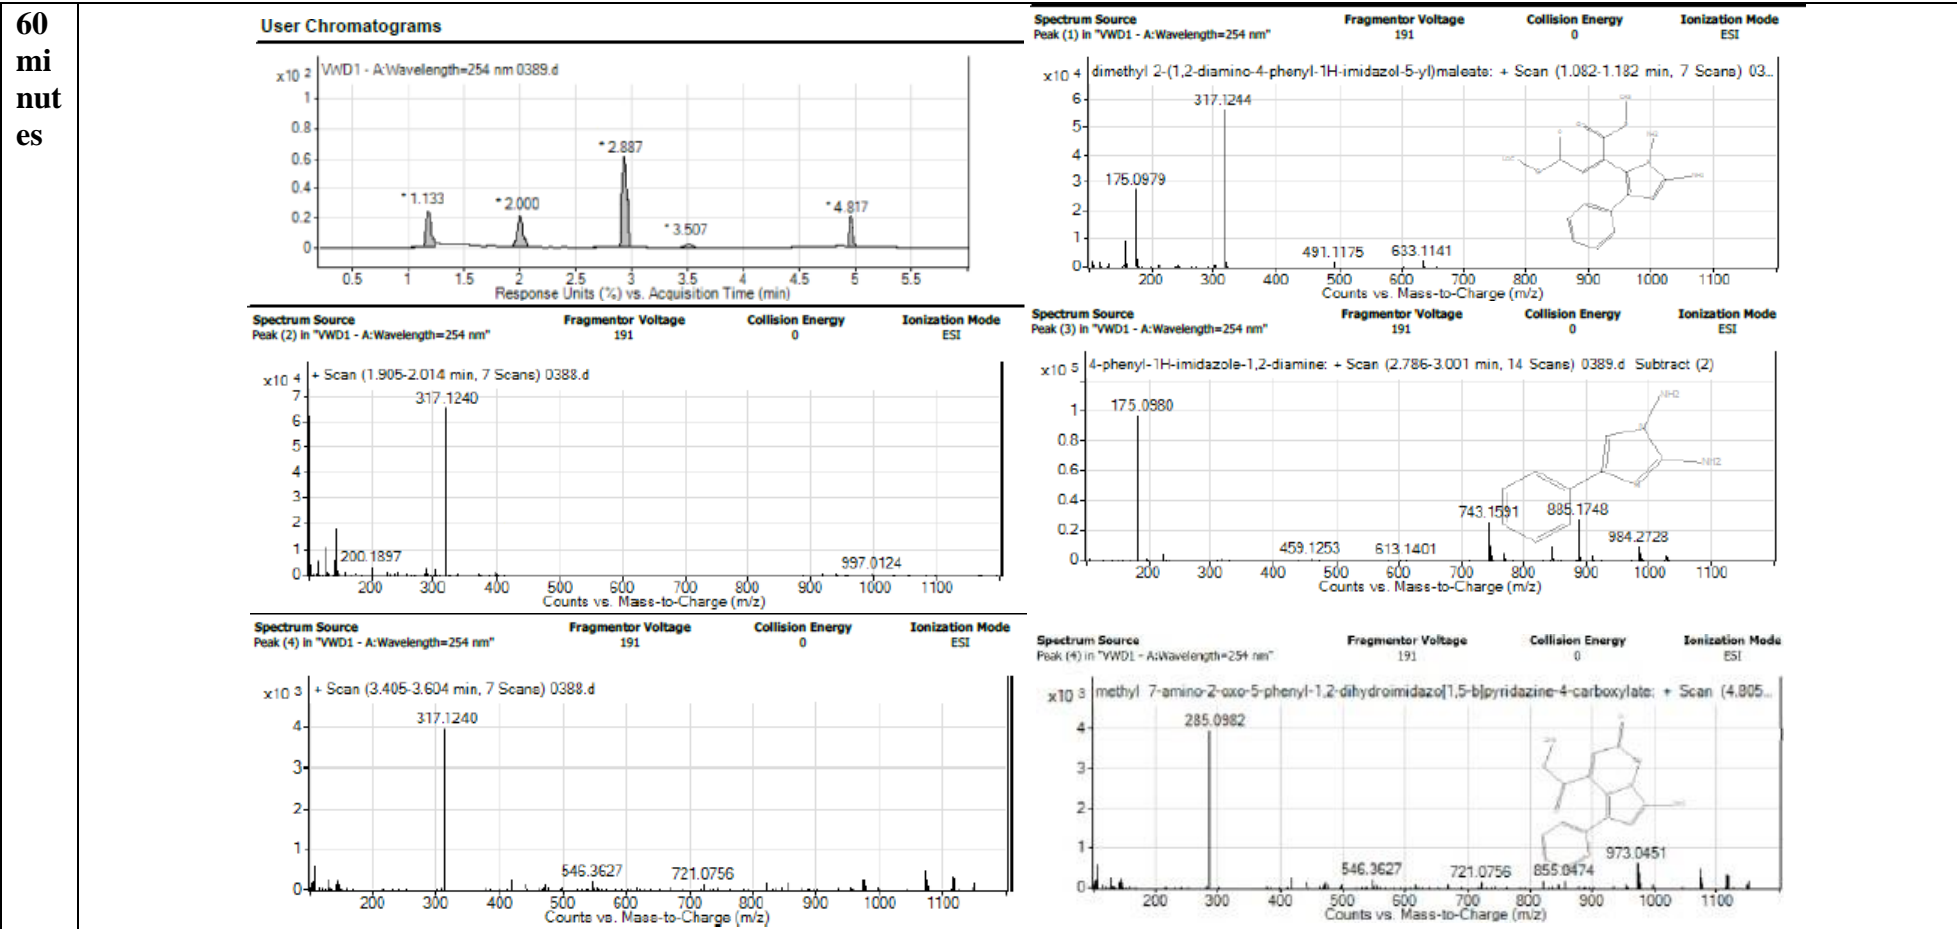



## User Chromatograms

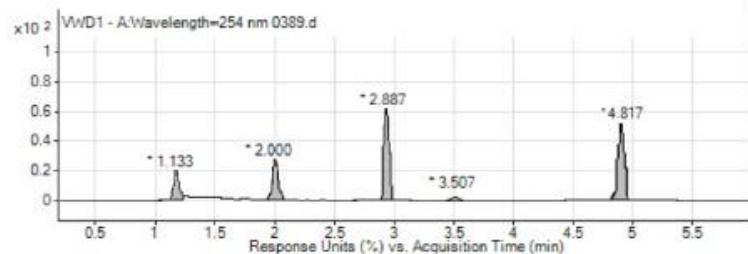

Spectrum Source  
Peak (2) in "VWD1 - A:Wavelength=254 nm"

Fragmentor Voltage 191 Collision Energy 0 Ionization Mode ESI

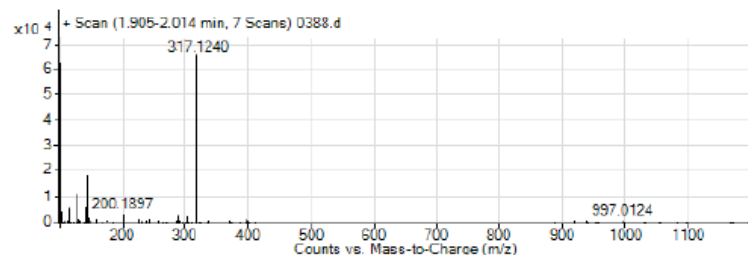

Spectrum Source  
Peak (4) in "VWD1 - A:Wavelength=254 nm"

Fragmentor Voltage 191 Collision Energy 0 Ionization Mode ESI

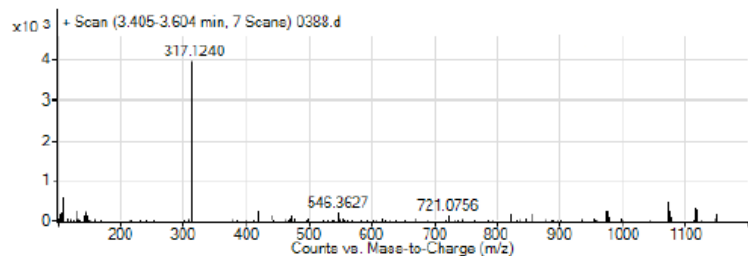

Spectrum Source  
Peak (1) in "VWD1 - A:Wavelength=254 nm"

Fragmentor Voltage 191 Collision Energy 0 Ionization Mode ESI

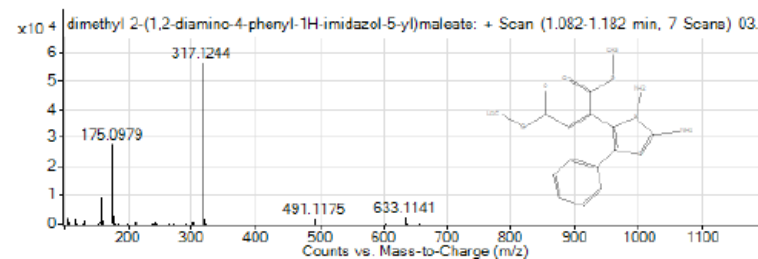

Spectrum Source  
Peak (3) in "VWD1 - A:Wavelength=254 nm"

Fragmentor Voltage 191 Collision Energy 0 Ionization Mode ESI

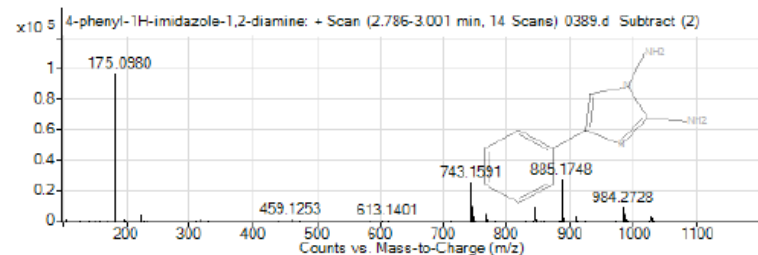

Spectrum Source  
Peak (4) in "VWD1 - A:Wavelength=254 nm"

Fragmentor Voltage 191 Collision Energy 0 Ionization Mode ESI

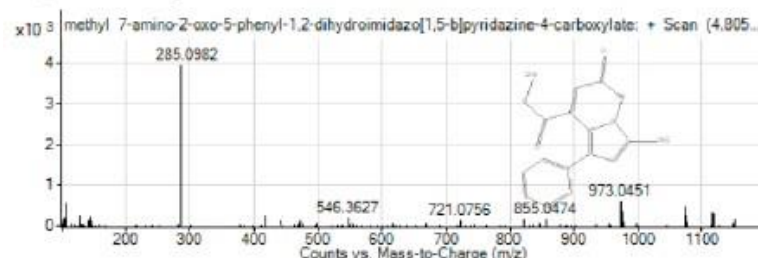



Table S5. Conducting the reaction in chloroform.

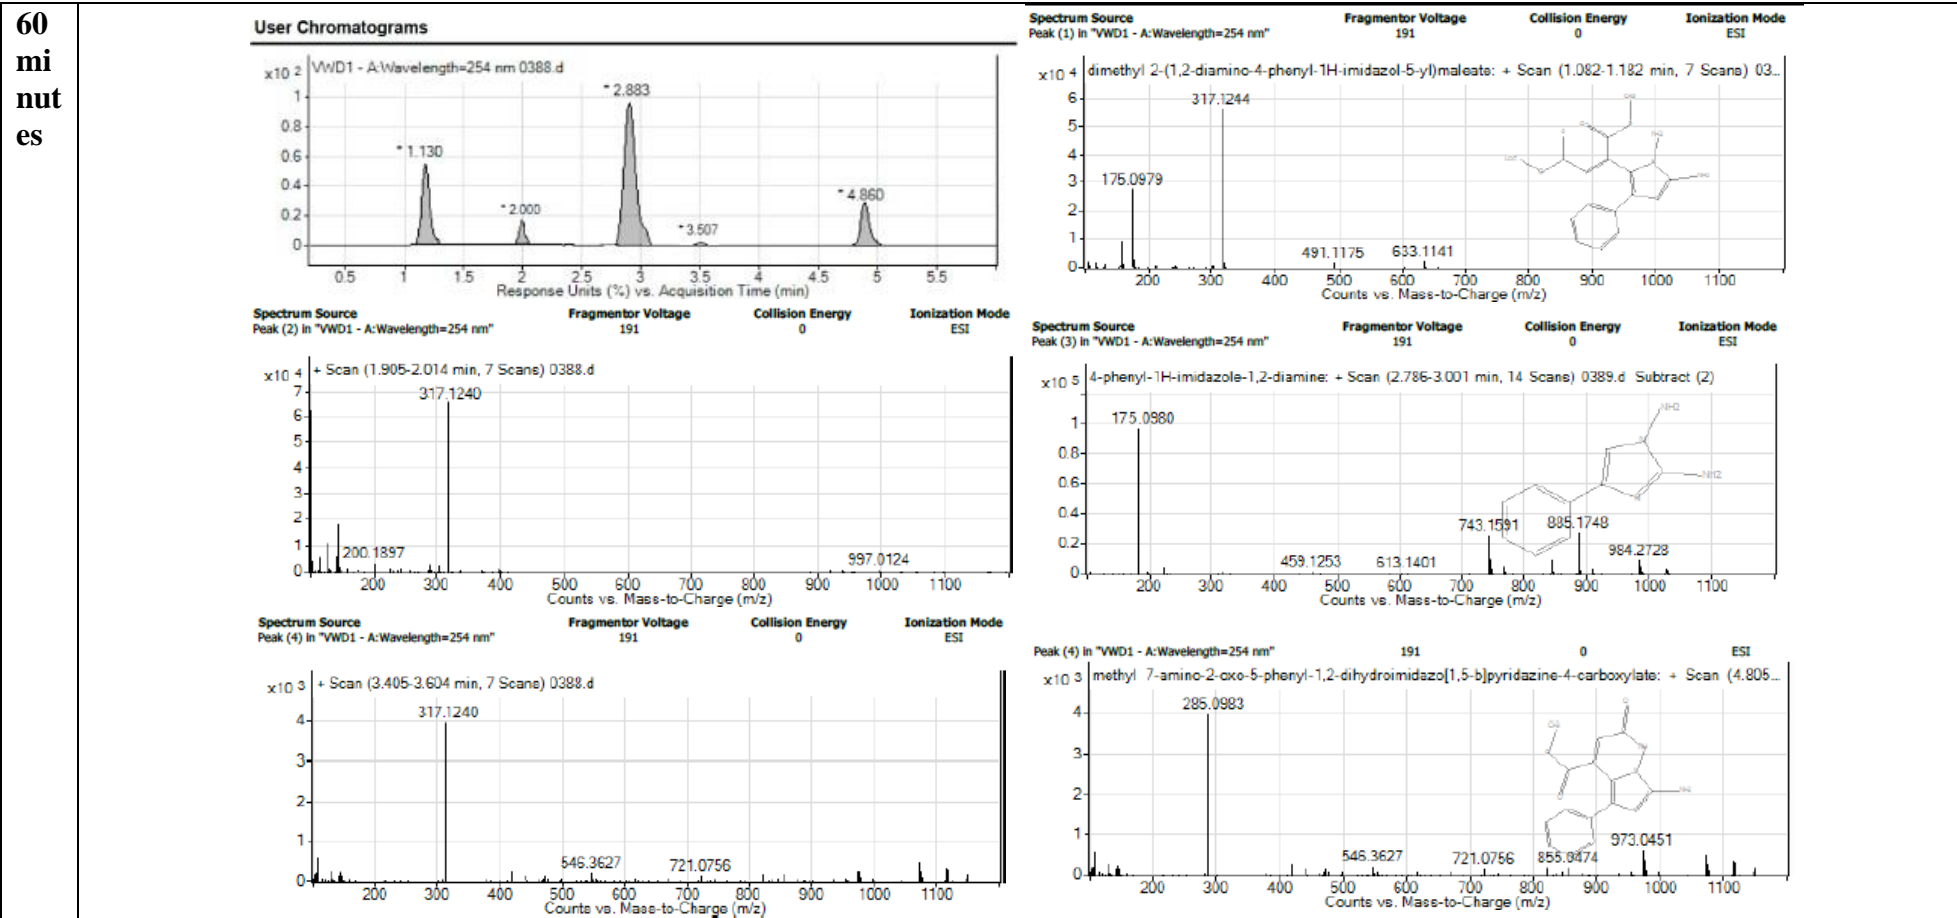

## User Chromatograms

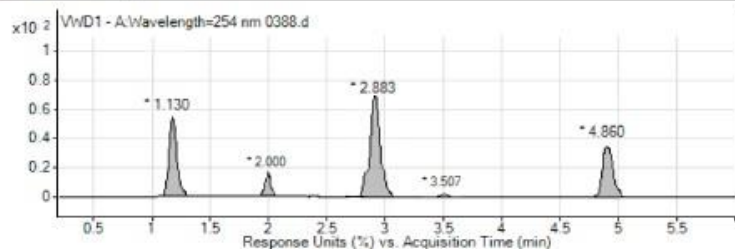

Spectrum Source  
Peak (1) in "VWD1 - A:Wavelength=254 nm"

Fragmentor Voltage 191 Collision Energy 0 Ionization Mode ESI

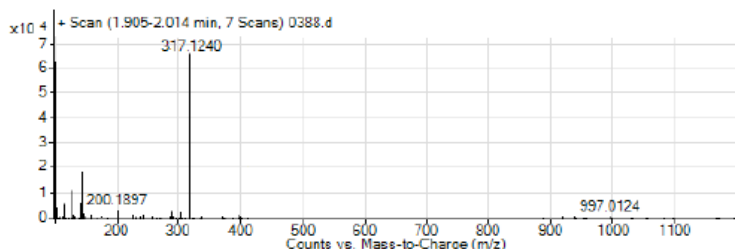

Spectrum Source  
Peak (2) in "VWD1 - A:Wavelength=254 nm"

Fragmentor Voltage 191 Collision Energy 0 Ionization Mode ESI

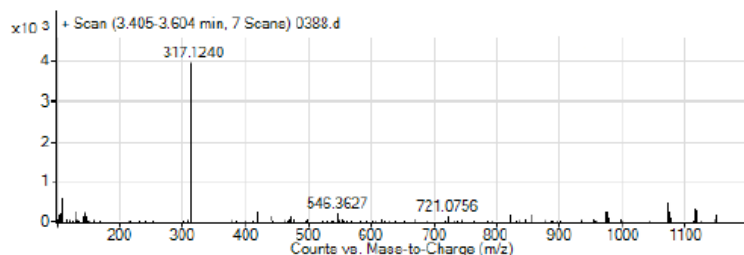

Spectrum Source  
Peak (1) in "VWD1 - A:Wavelength=254 nm"

Fragmentor Voltage 191 Collision Energy 0 Ionization Mode ESI

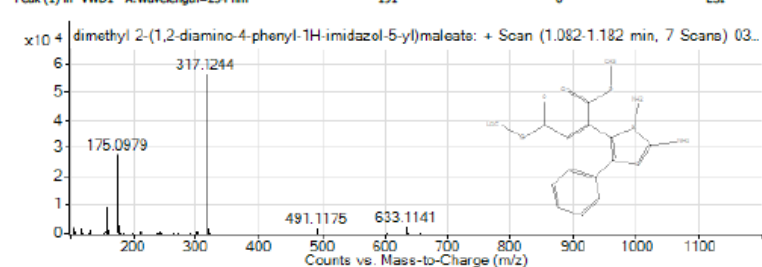

Spectrum Source  
Peak (3) in "VWD1 - A:Wavelength=254 nm"

Fragmentor Voltage 191 Collision Energy 0 Ionization Mode ESI

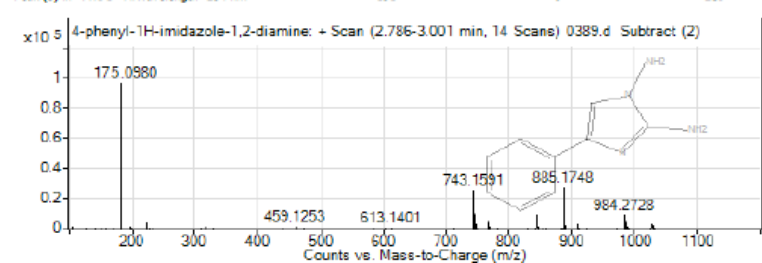

Peak (4) in "VWD1 - A:Wavelength=254 nm"

191 0 ESI

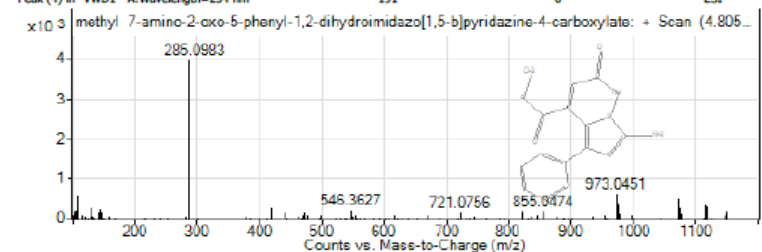

**Table S6. Conducting the reaction in methanol.**

|                         |                                                                                                                                                                                                                                                                                                                                                                                |
|-------------------------|--------------------------------------------------------------------------------------------------------------------------------------------------------------------------------------------------------------------------------------------------------------------------------------------------------------------------------------------------------------------------------|
| <b>60 min<br/>utes</b>  | <p><b>User Chromatograms</b></p> 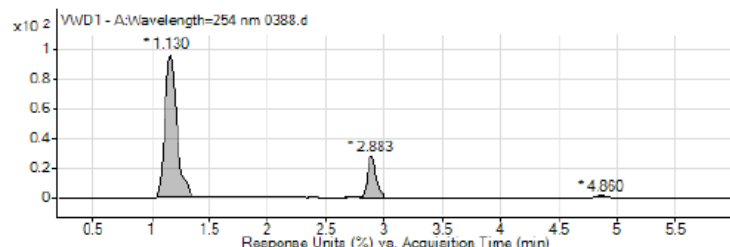    |
| <b>120 min<br/>utes</b> | <p><b>User Chromatograms</b></p>                                                                                    |

**Table S7. Conducting the reaction in ethanol.**

|                           |                                                                                                                                                                                                                                                                                                                                                                                                                                                                                                           |
|---------------------------|-----------------------------------------------------------------------------------------------------------------------------------------------------------------------------------------------------------------------------------------------------------------------------------------------------------------------------------------------------------------------------------------------------------------------------------------------------------------------------------------------------------|
| <p><b>60 minutes</b></p>  | <p><b>User Chromatograms</b></p> <p>Fragmentor Voltage 191 Collision Energy 0 Ionization Mode ESI</p> 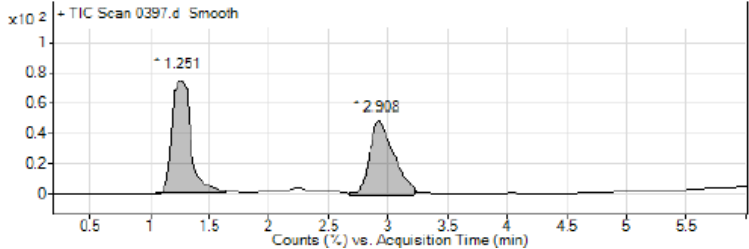 <p>Fragmentor Voltage 191 Collision Energy 0 Ionization Mode ESI</p>  <p>Fragmentor Voltage 191 Collision Energy 0 Ionization Mode ESI</p>  |
| <p><b>120 minutes</b></p> | <p><b>User Chromatograms</b></p> <p>Fragmentor Voltage 191 Collision Energy 0 Ionization Mode ESI</p>  <p>Fragmentor Voltage 191 Collision Energy 0 Ionization Mode ESI</p>                                                                                                                                                        |

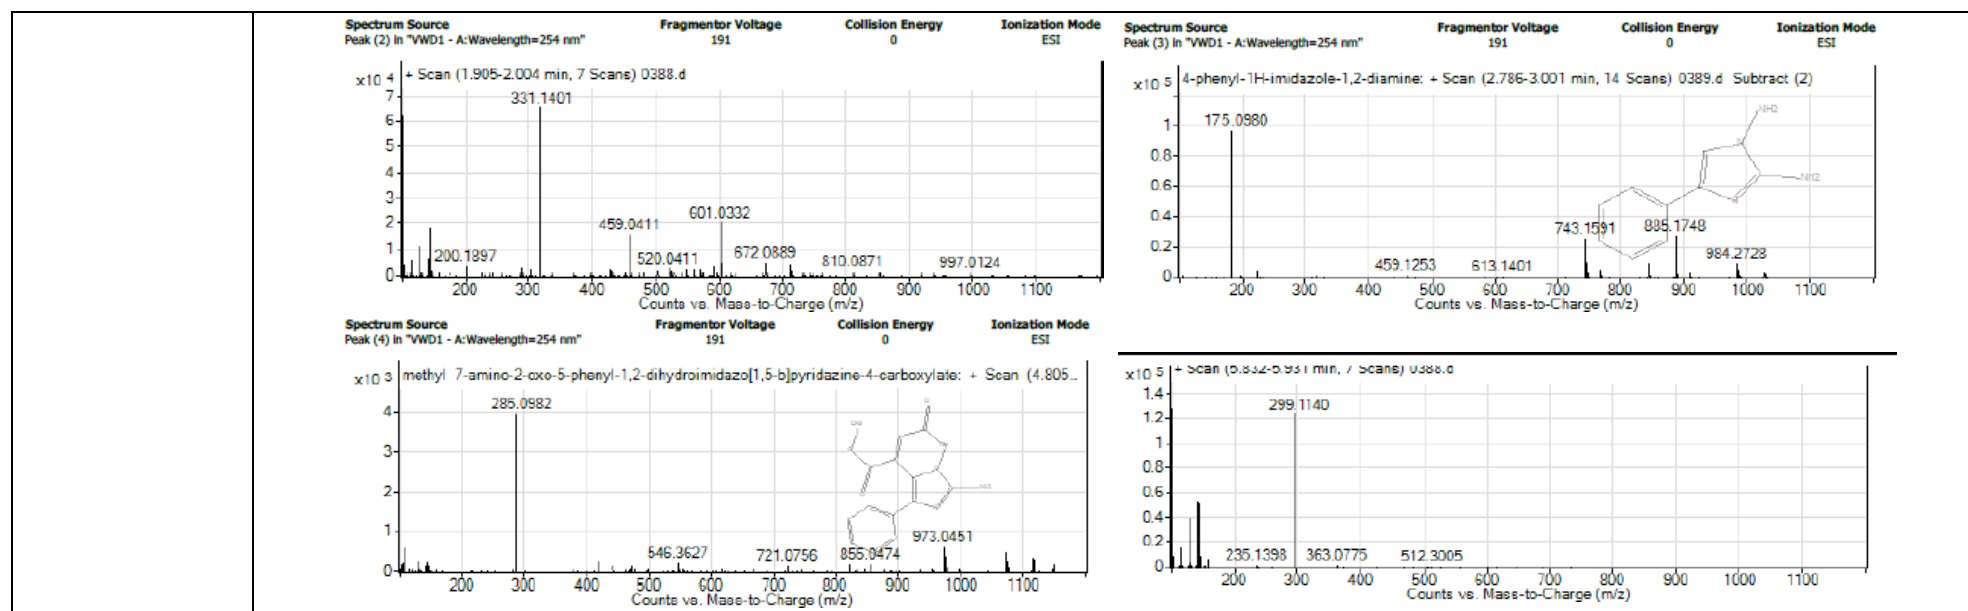

**Table S8. Reaction in methanol with the addition of acetic acid as a catalyst.**

**60 minutes**

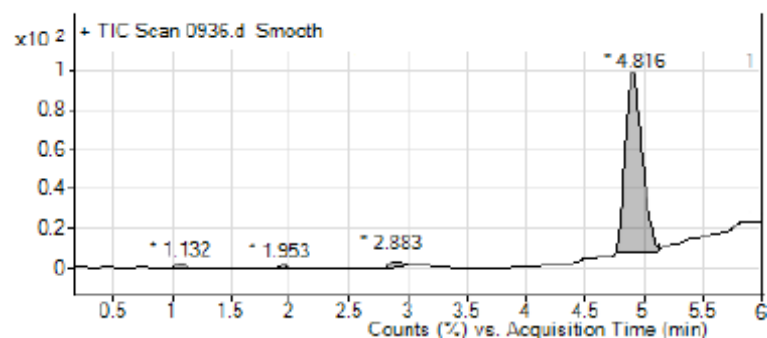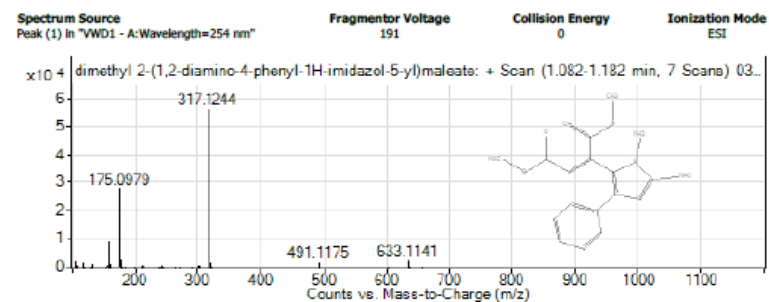

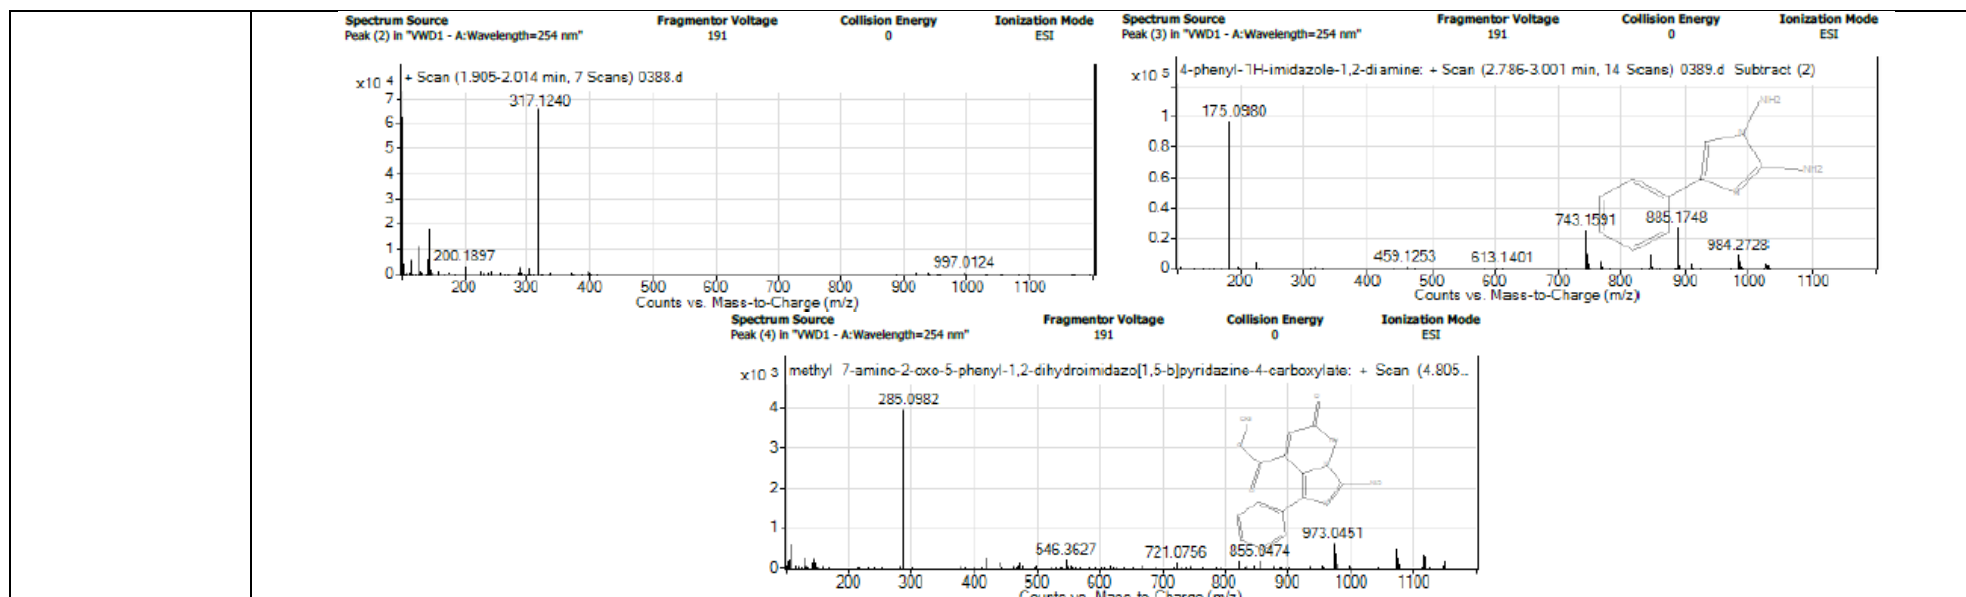

**Table S9. Conducting the reaction in a 1:1 mixture of methanol and acetic acid.**

**60 minutes**

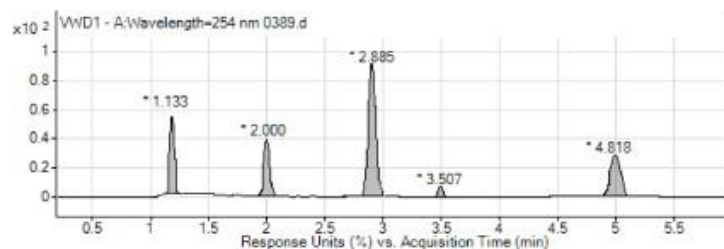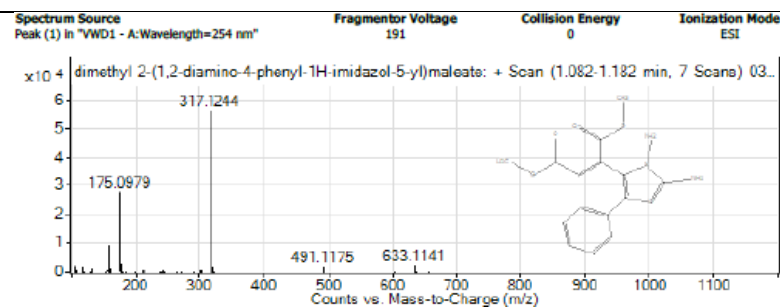

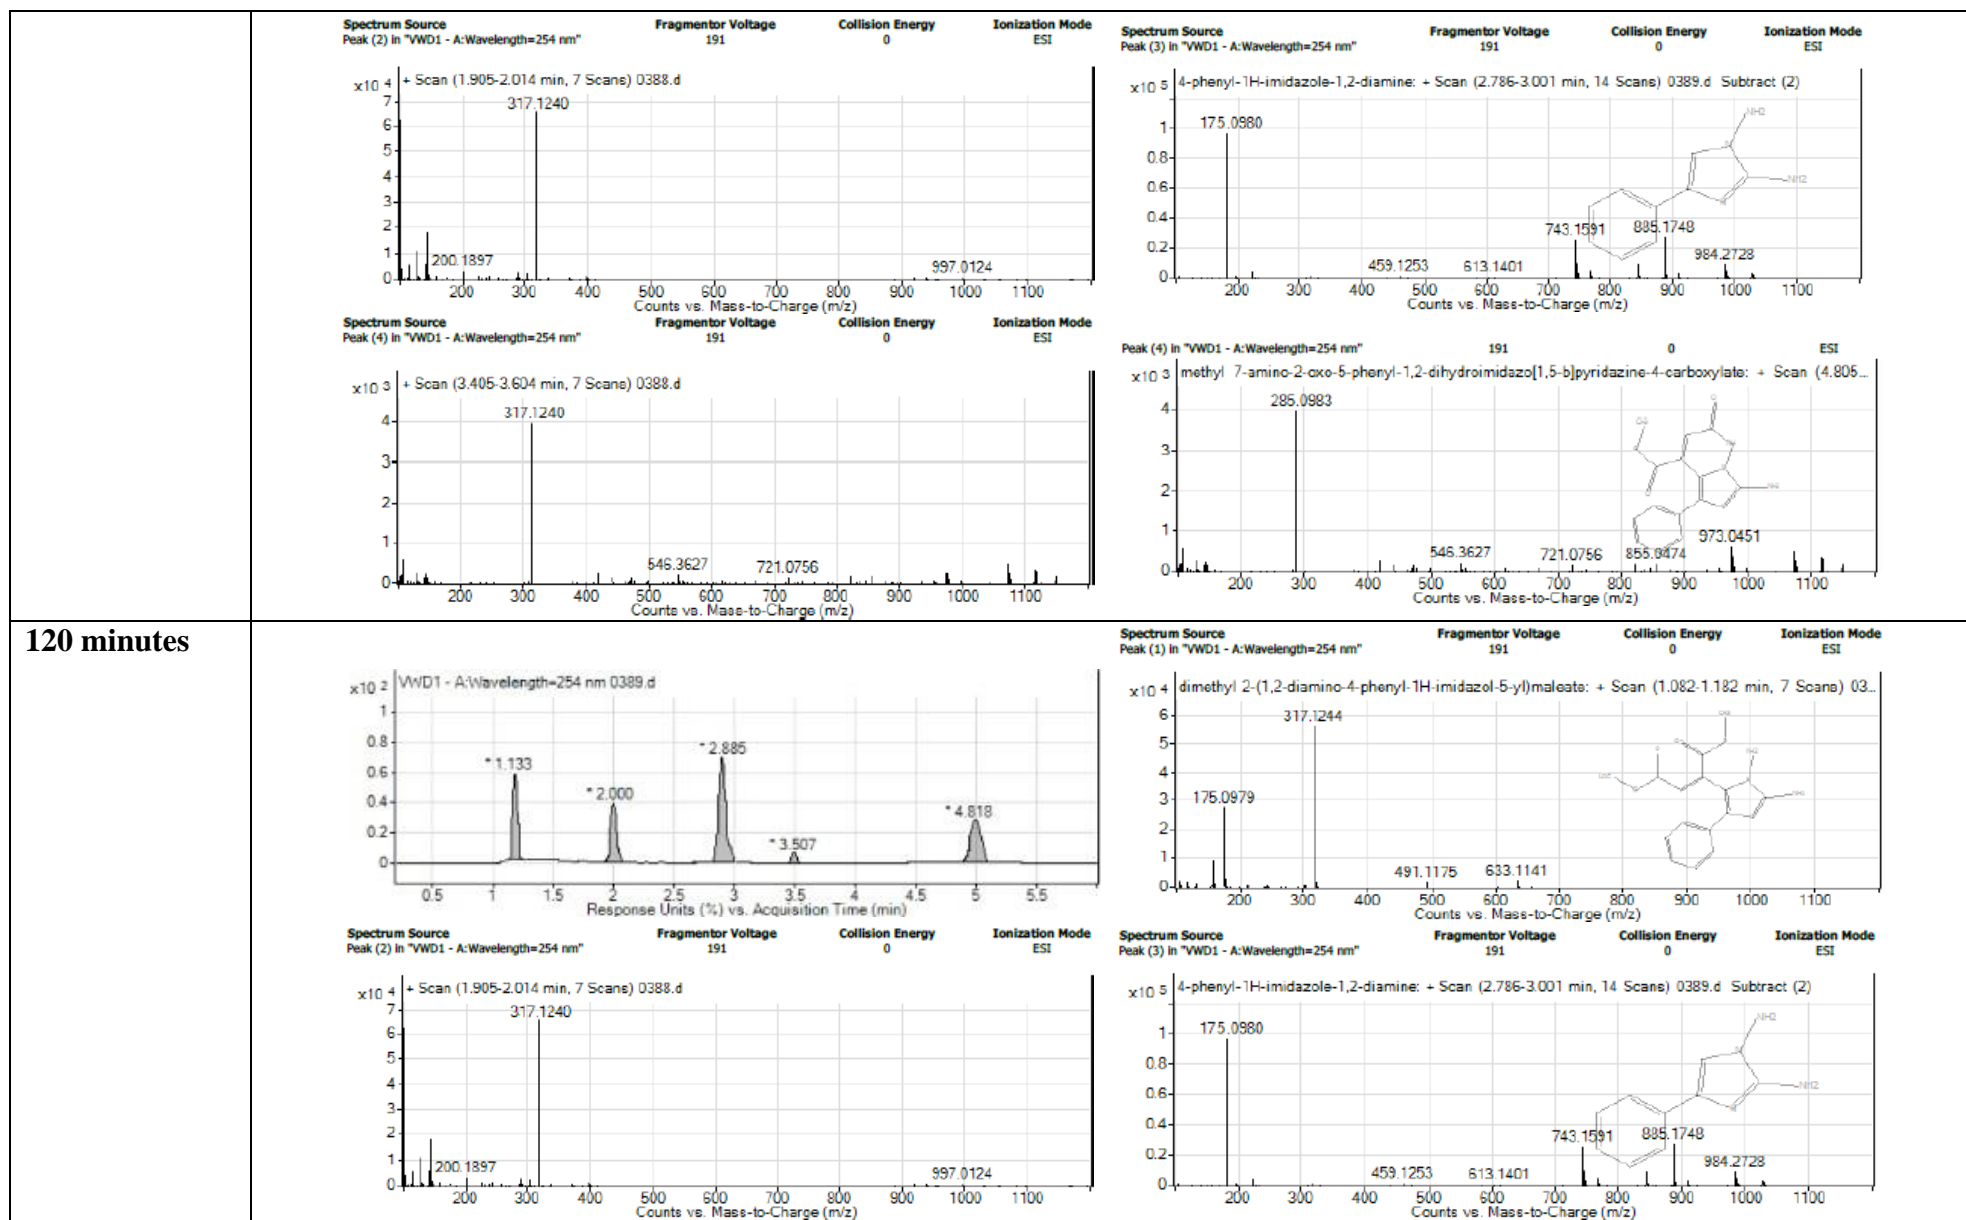



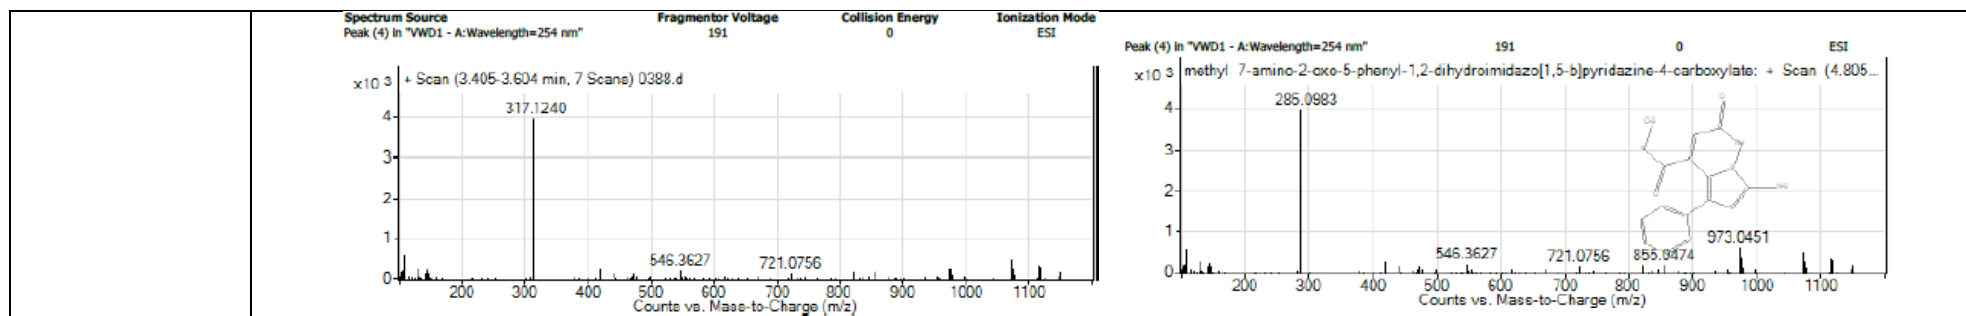

**Table S10. Conducting the reaction in acetic acid.**

**60 minutes**

Fragmentor Voltage 191 Collision Energy 0 Ionization Mode ESI

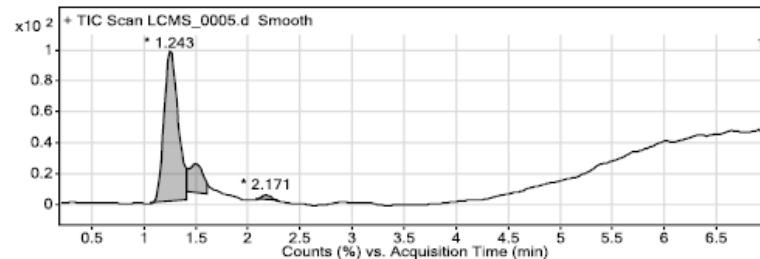

Fragmentor Voltage 191 Collision Energy 0 Ionization Mode ESI

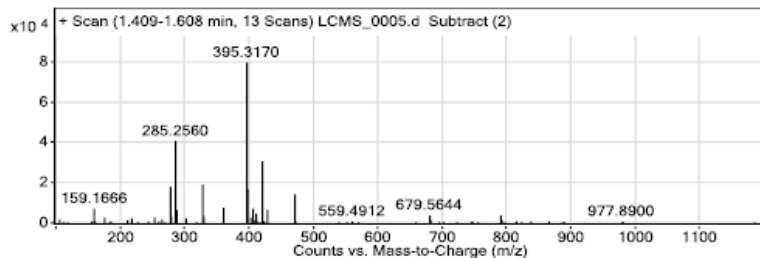

191 0 ESI

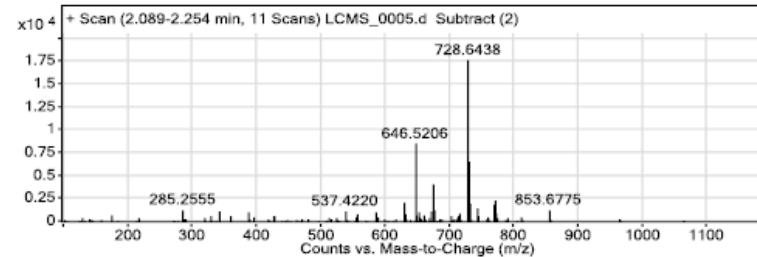

**Table S11.**

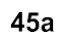

7-amino-1,2-dihydro-2-oxo-5-phenylimidazo[1,5-b]pyridazine-4-carboxylate

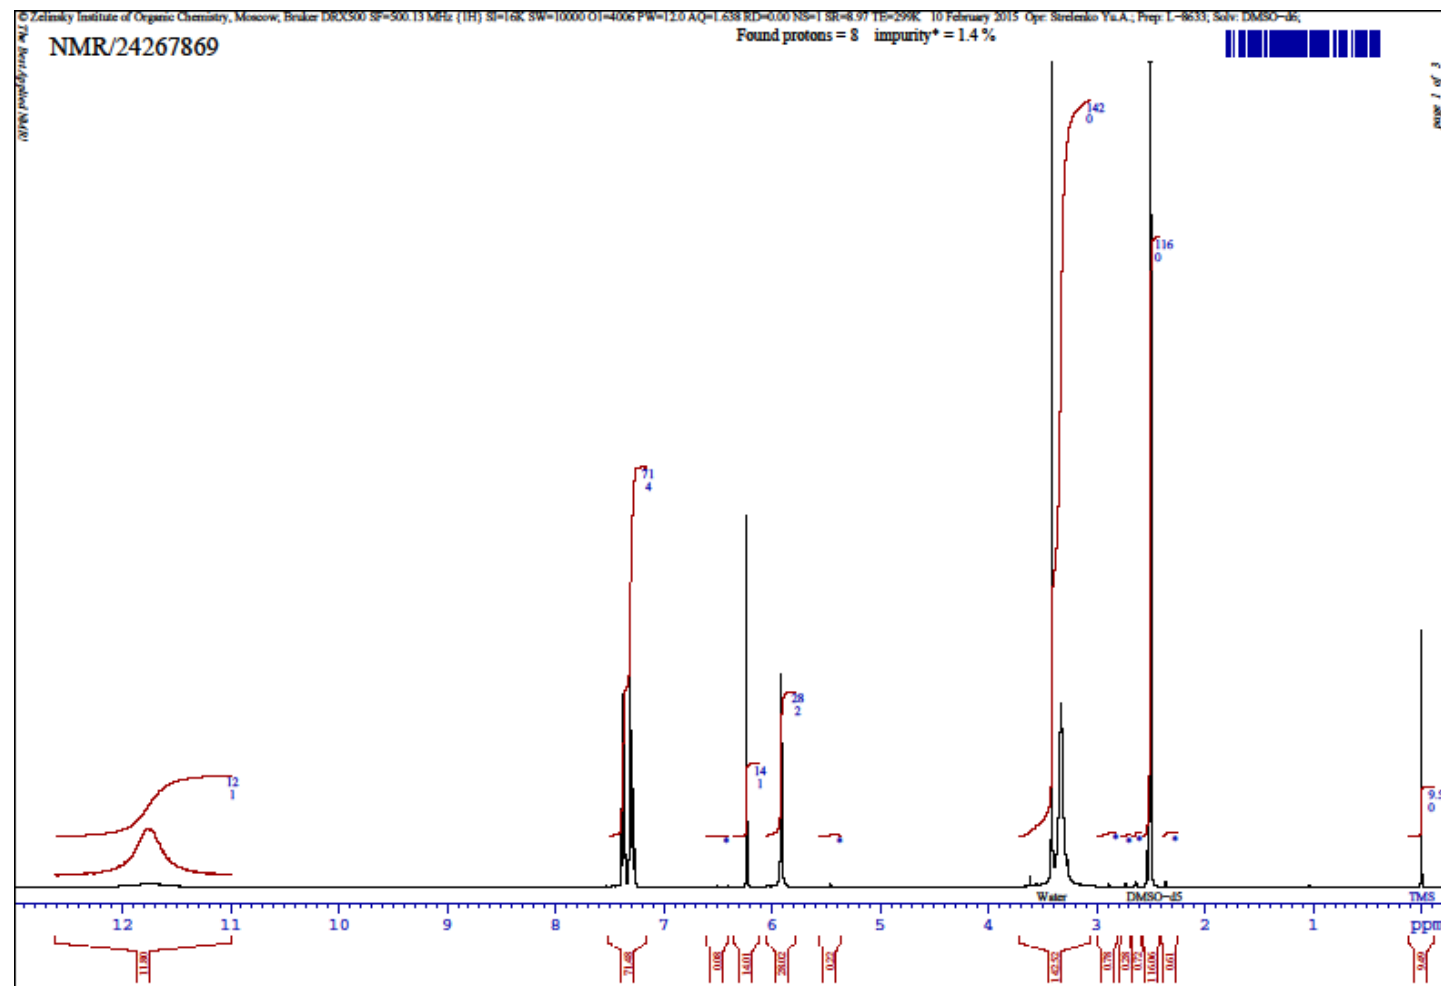

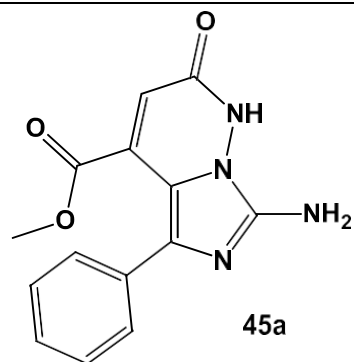

7-amino-1,2-dihydro-2-oxo-5-phenylimidazo[1,5-b]pyridazine-4-carboxylate

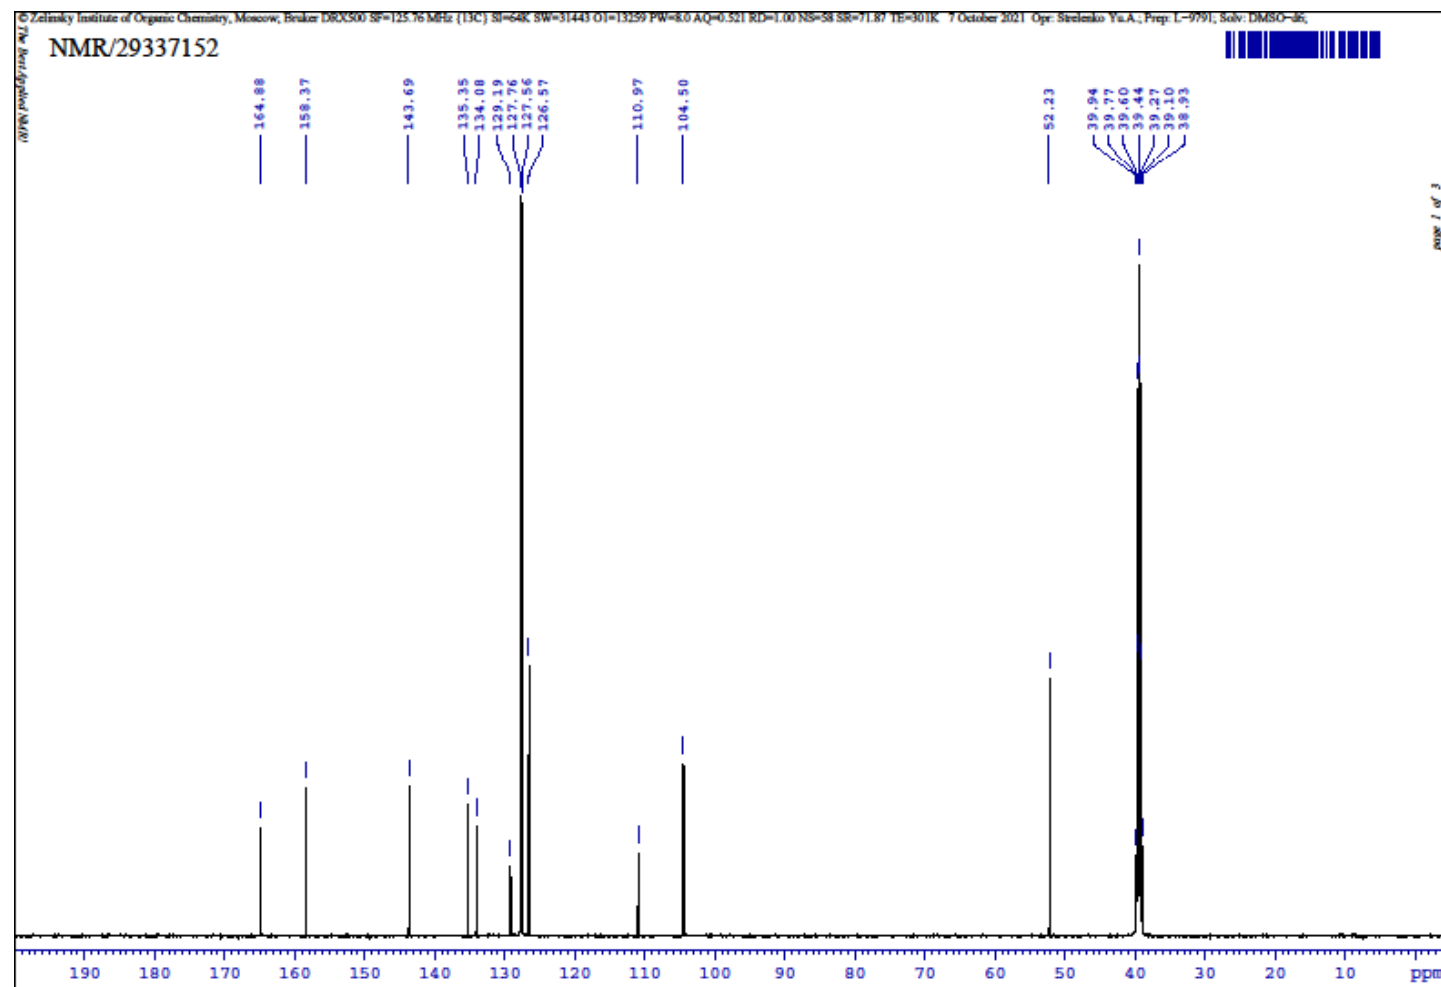

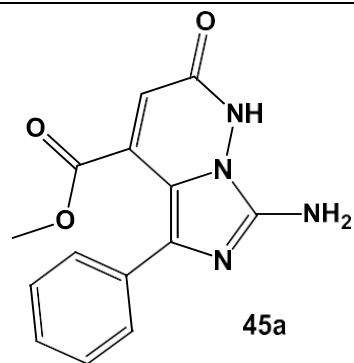

45a

7-amino-1,2-dihydro-2-oxo-5-phenylimidazo[1,5-b]pyridazine-4-carboxylate

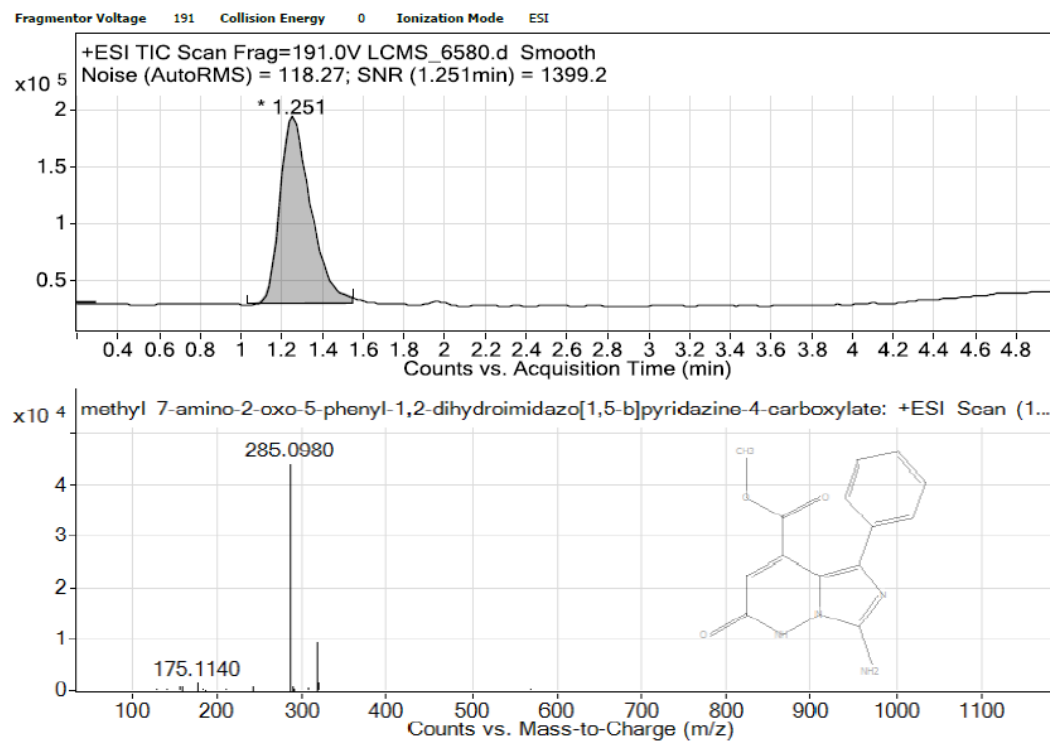

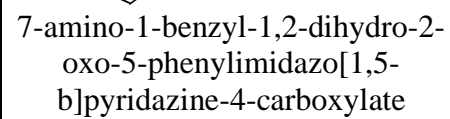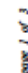

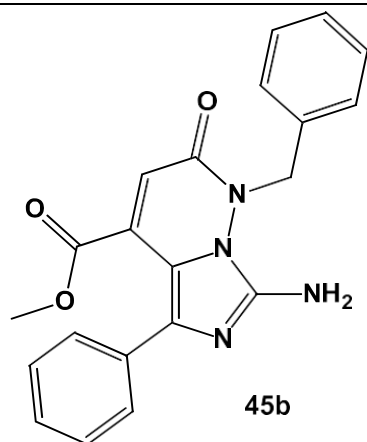

7-amino-1-benzyl-1,2-dihydro-2-oxo-5-phenylimidazo[1,5-b]pyridazine-4-carboxylate

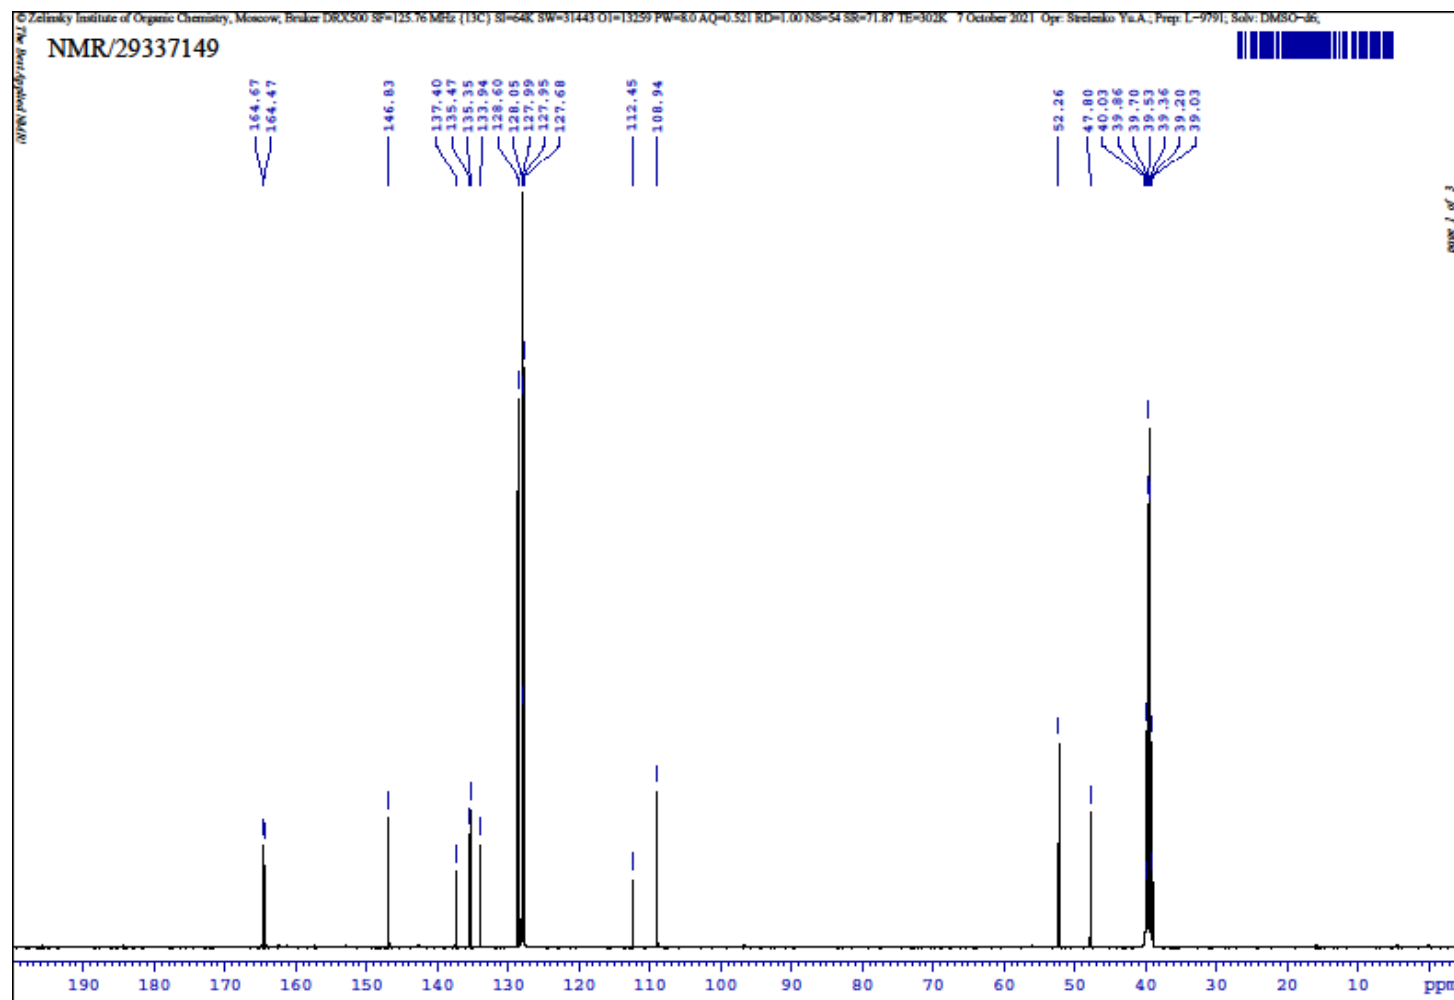

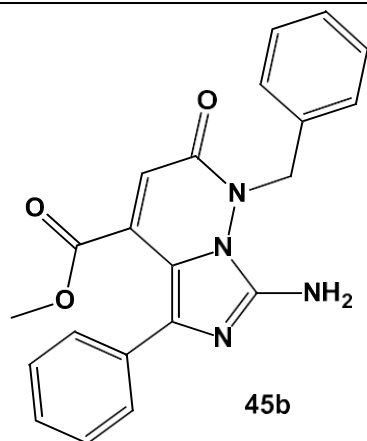

7-amino-1-benzyl-1,2-dihydro-2-oxo-5-phenylimidazo[1,5-b]pyridazine-4-carboxylate

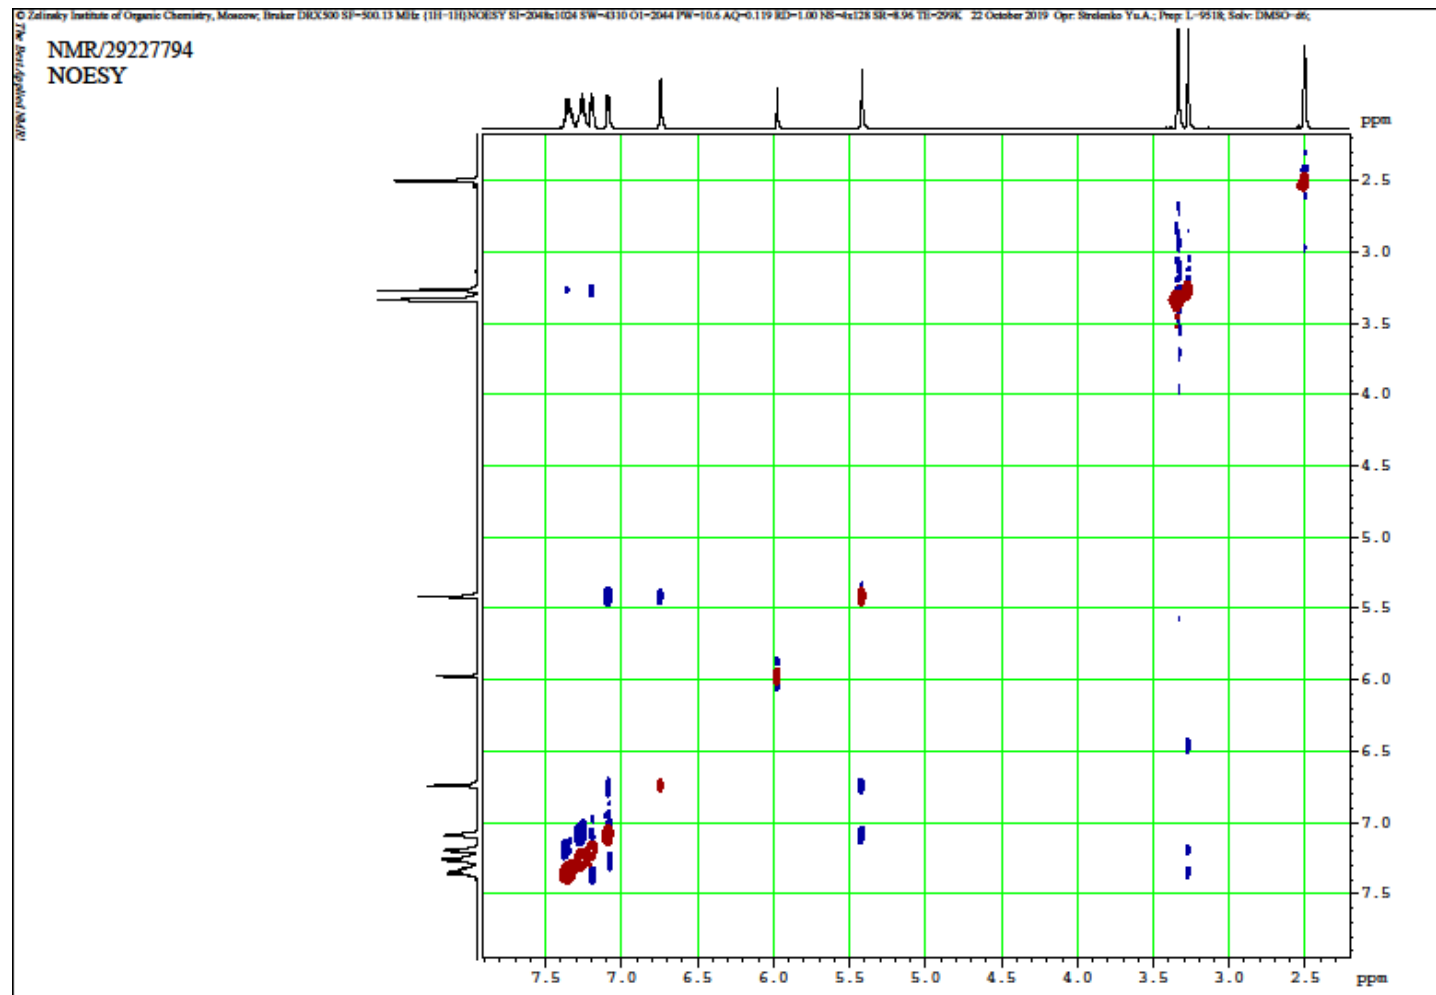





7-amino-1-benzyl-1,2-dihydro-2-oxo-5-phenylimidazo[1,5-b]pyridazine-4-carboxylate

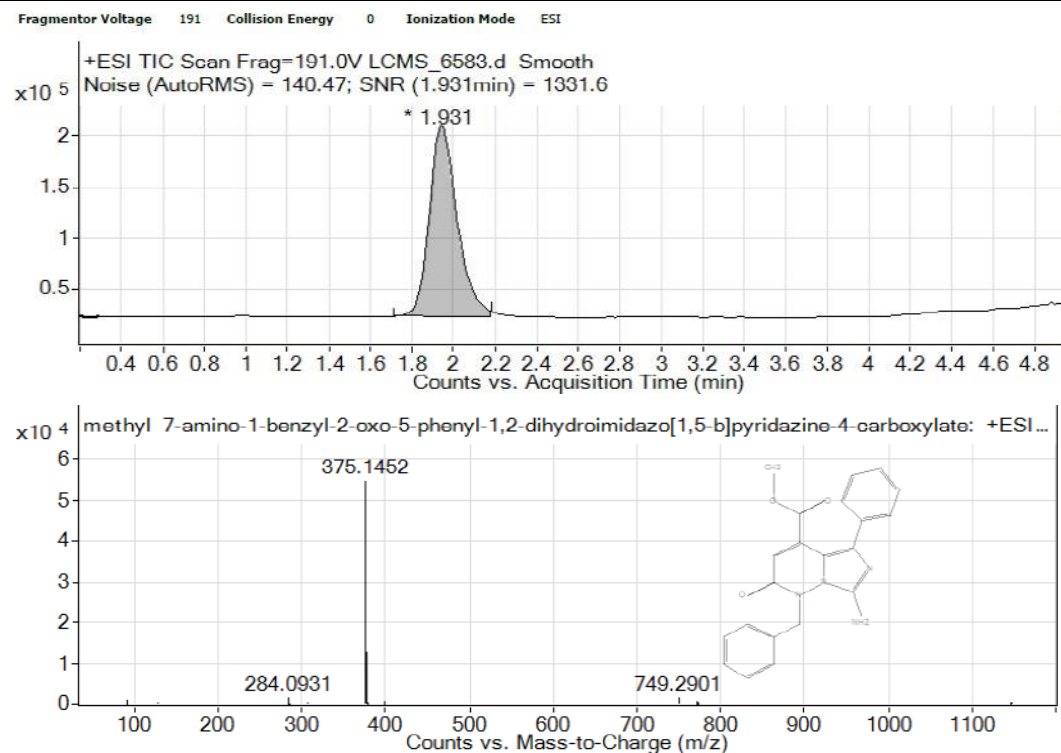

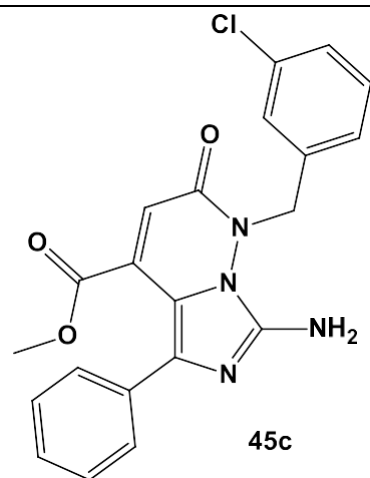

7-amino-1-(3-chlorobenzyl)-1,2-dihydro-2-oxo-5-phenylimidazo[1,5-b]pyridazine-4-carboxylate

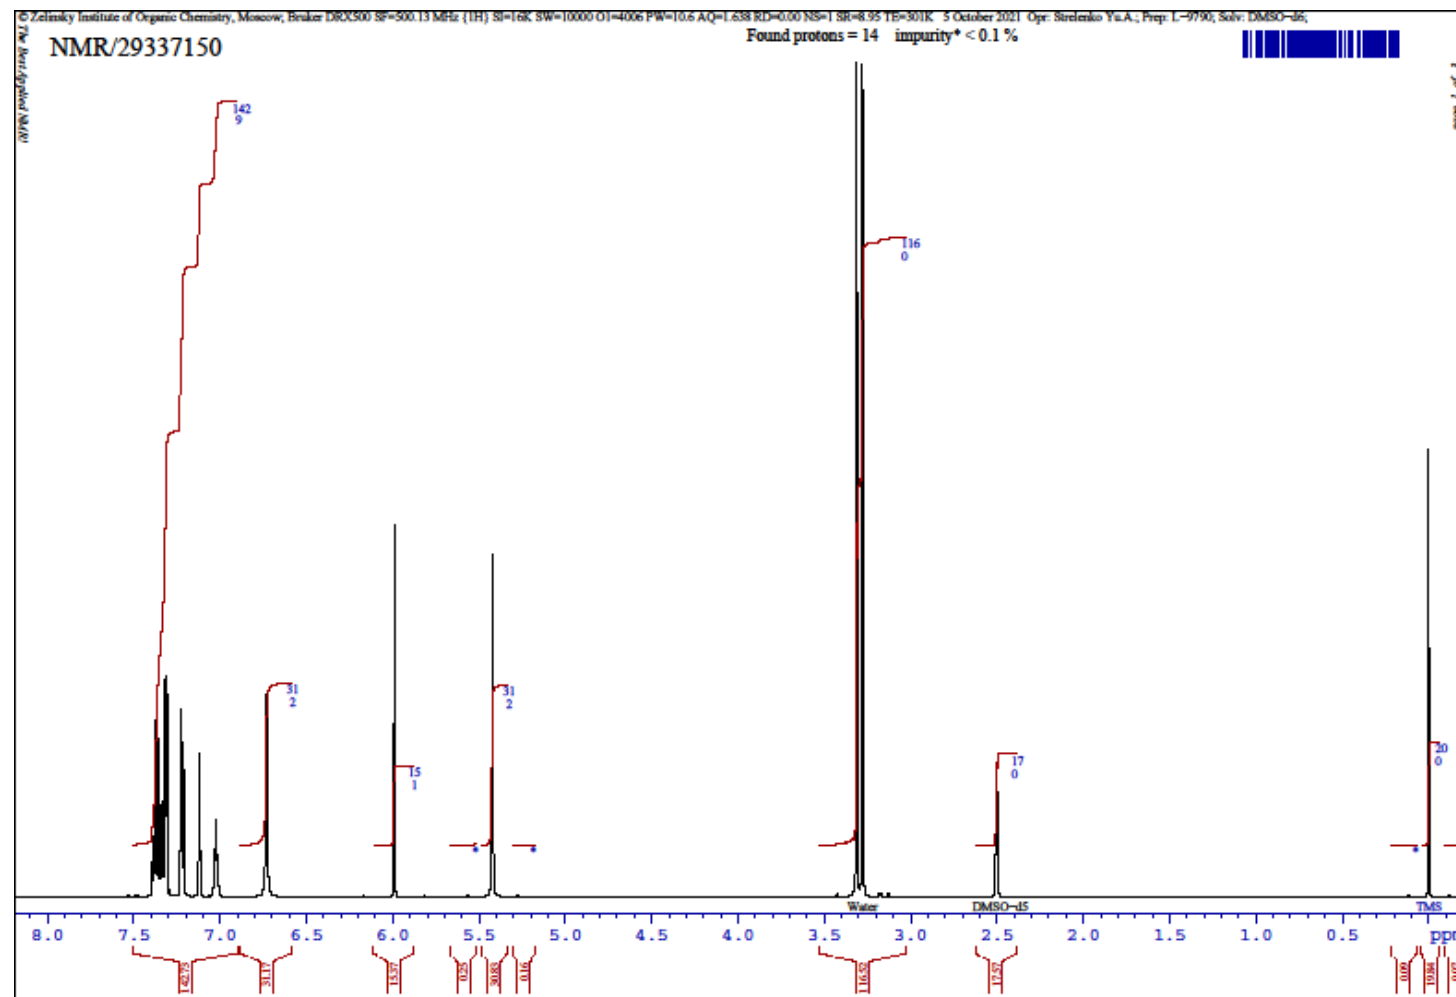



7-amino-1-(3-chlorobenzyl)-1,2-dihydro-2-oxo-5-phenylimidazo[1,5-b]pyridazine-4-carboxylate

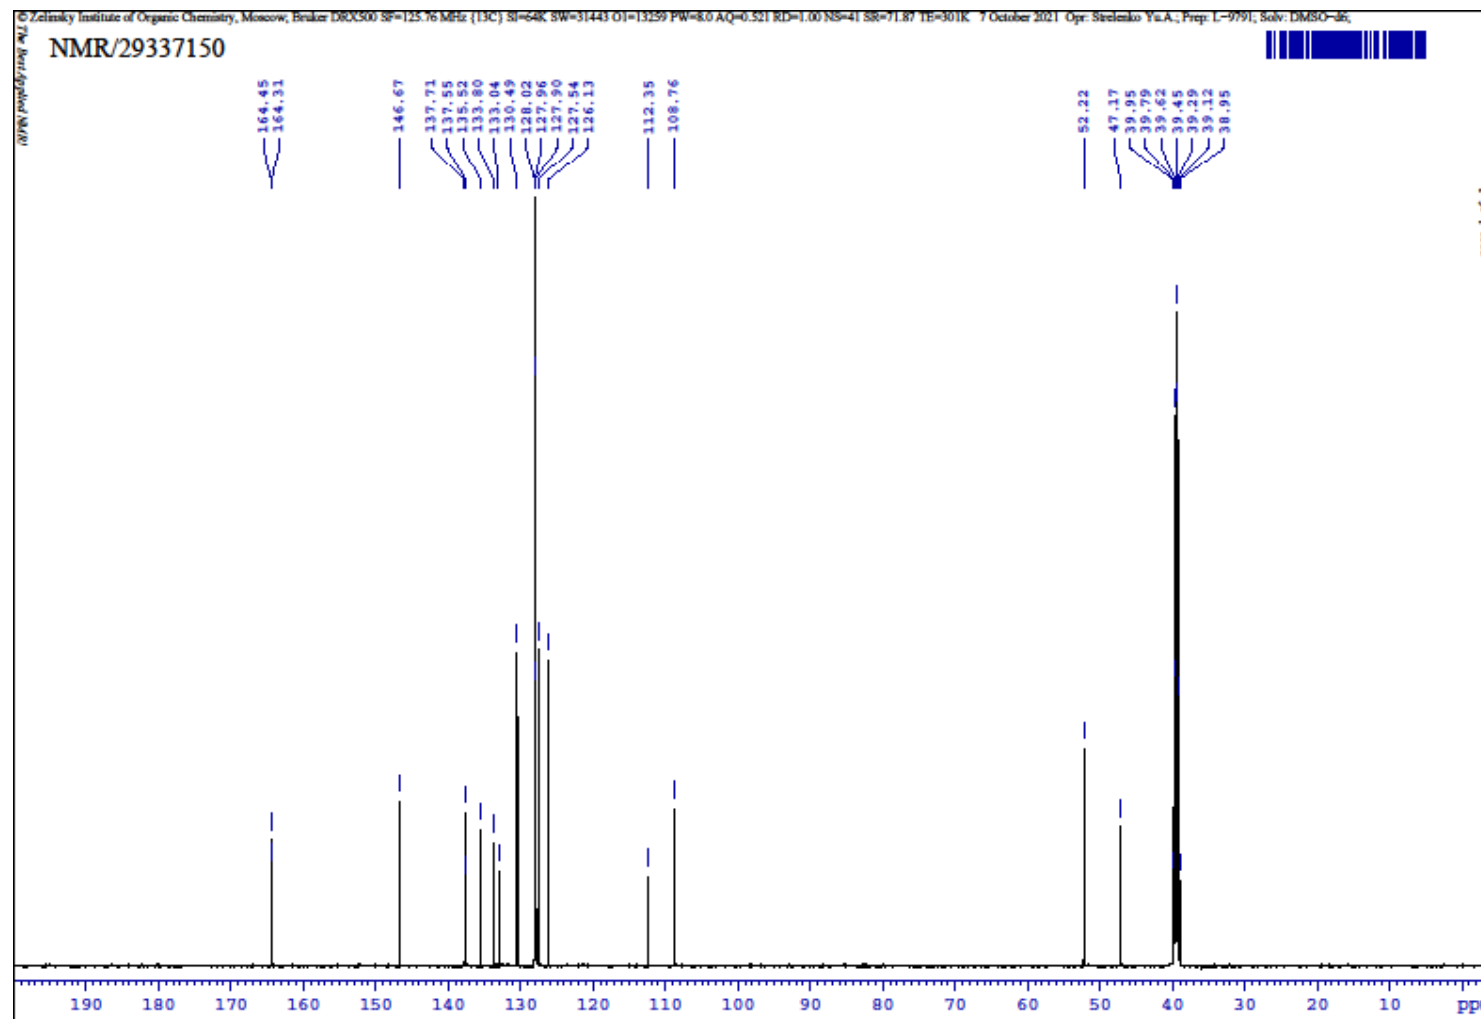

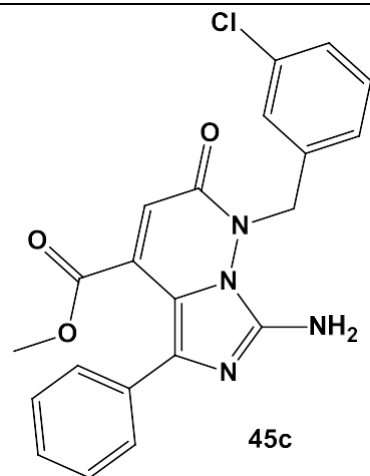

7-amino-1-(3-chlorobenzyl)-1,2-dihydro-2-oxo-5-phenylimidazo[1,5-b]pyridazine-4-carboxylate

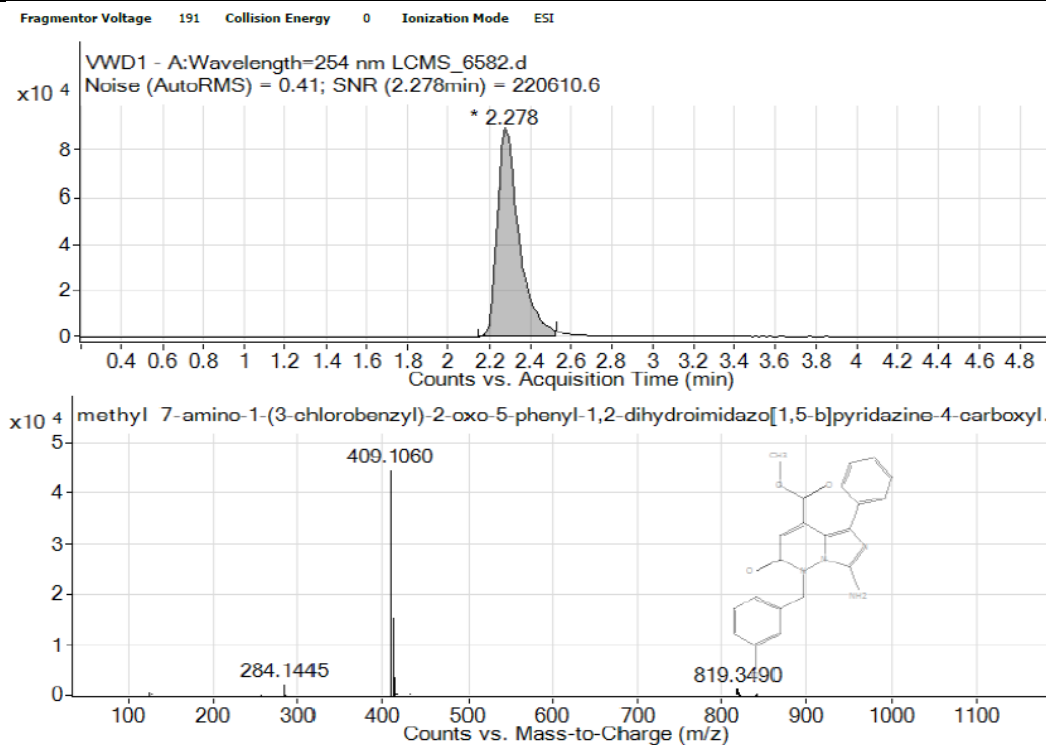

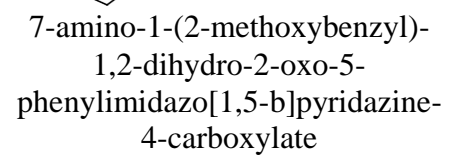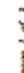

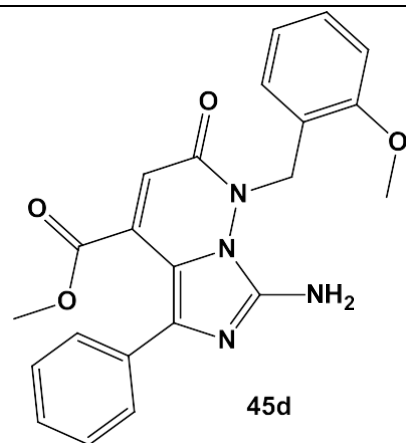

7-amino-1-(2-methoxybenzyl)-  
1,2-dihydro-2-oxo-5-  
phenylimidazo[1,5-b]pyridazine-  
4-carboxylate

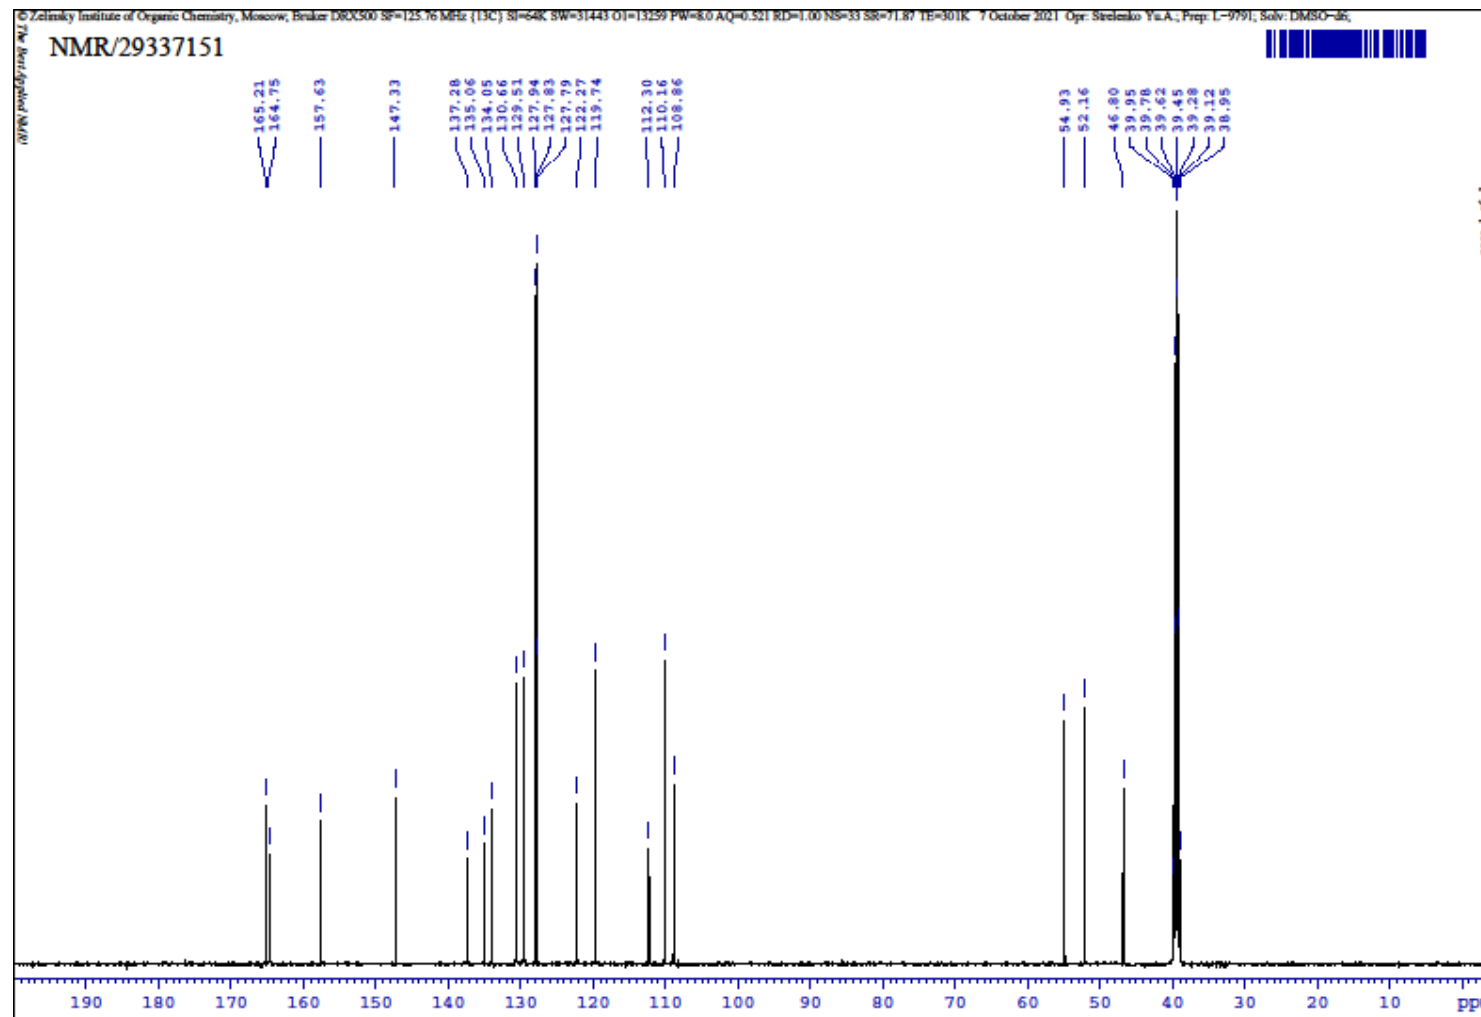

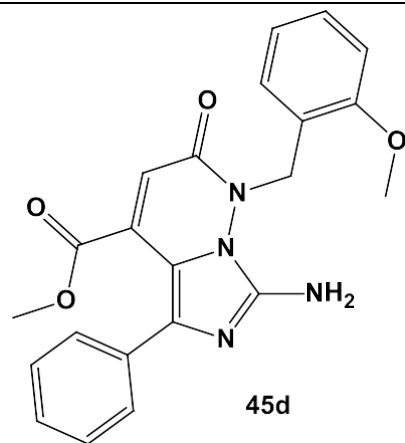

7-amino-1-(2-methoxybenzyl)-1,2-dihydro-2-oxo-5-phenylimidazo[1,5-b]pyridazine-4-carboxylate

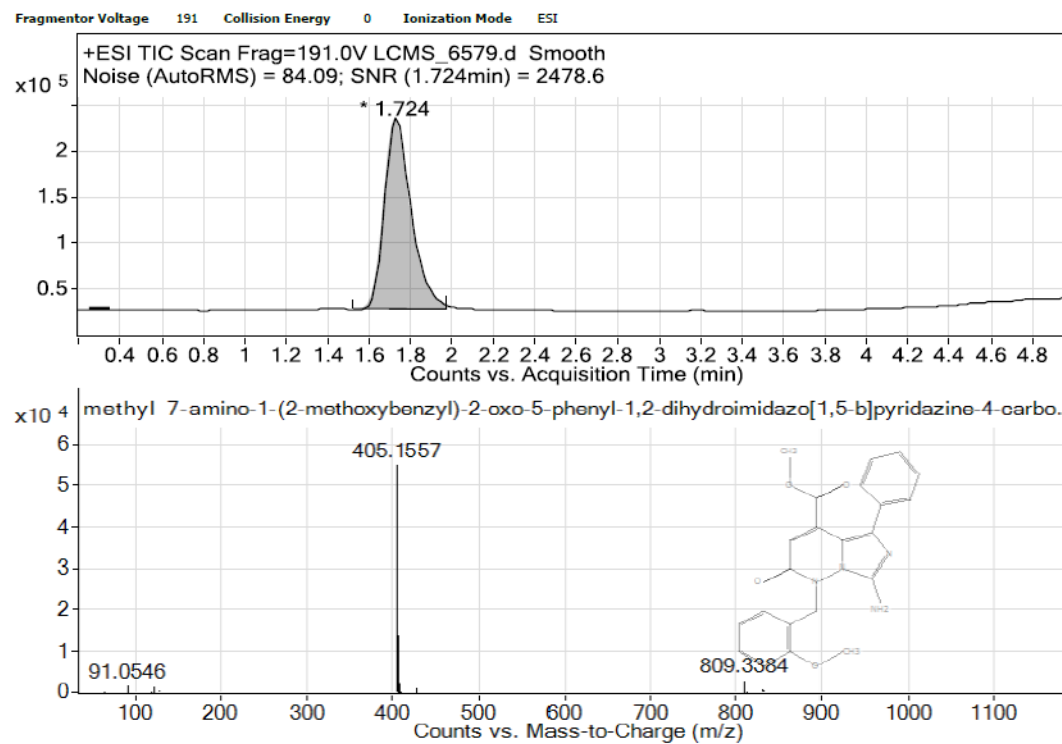



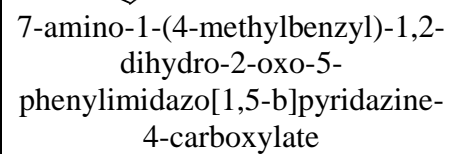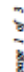

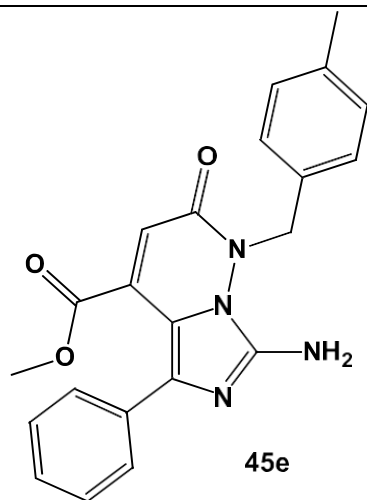

7-amino-1-(4-methylbenzyl)-1,2-dihydro-2-oxo-5-phenylimidazo[1,5-b]pyridazine-4-carboxylate

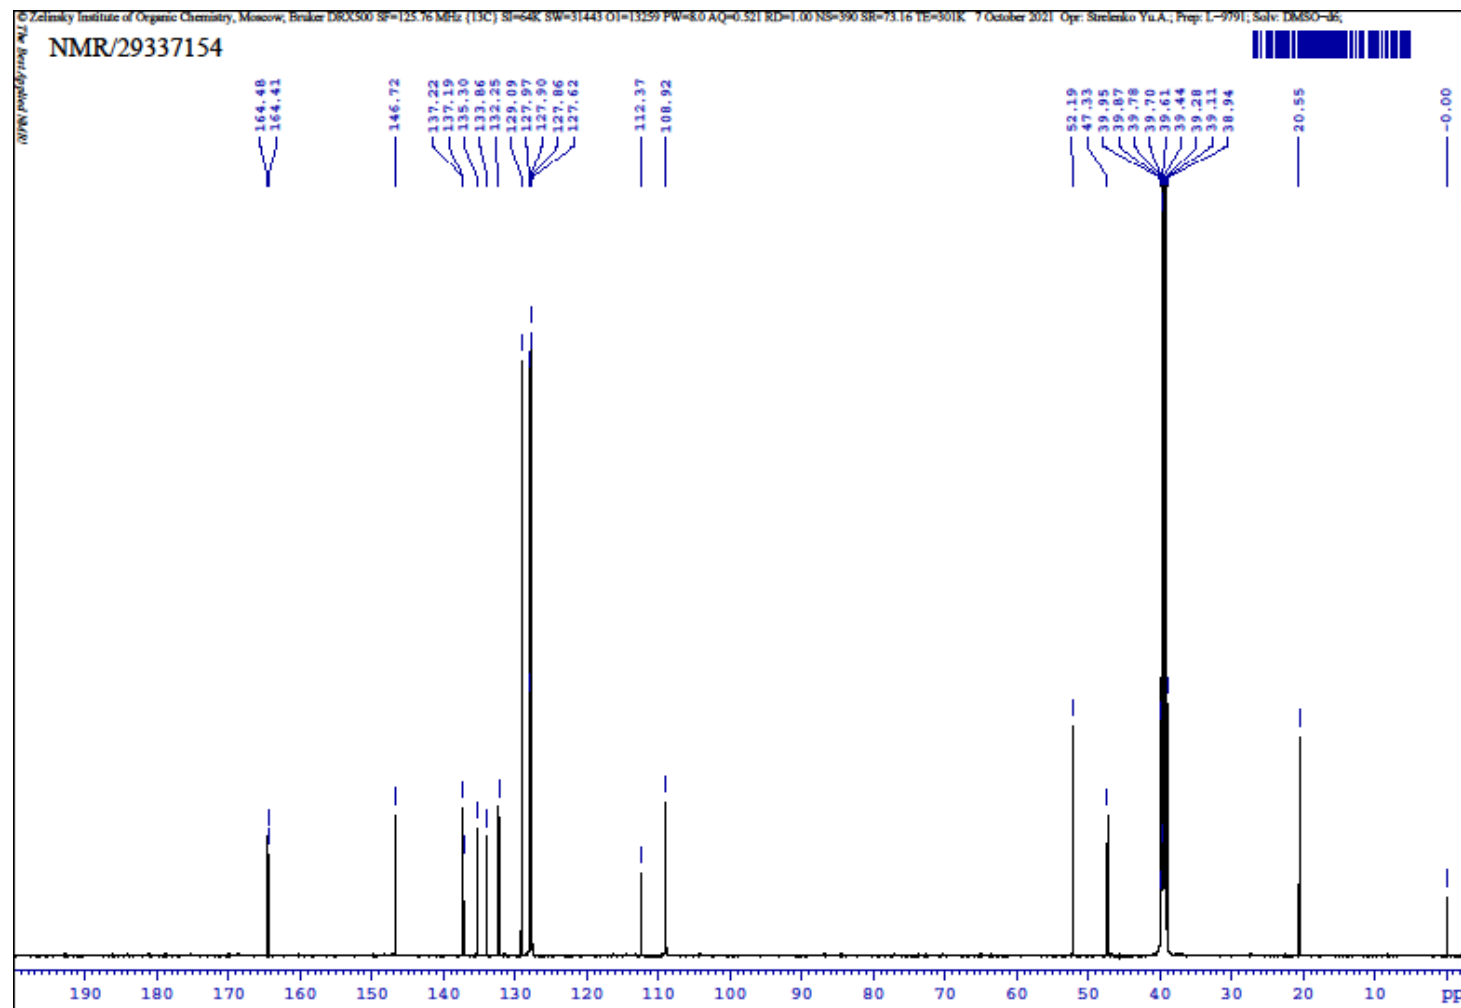

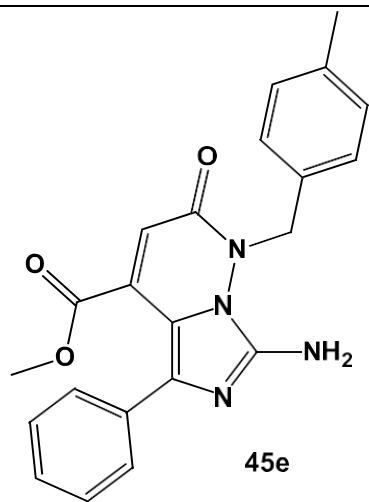

45e

7-amino-1-(4-methylbenzyl)-1,2-dihydro-2-oxo-5-phenylimidazo[1,5-b]pyridazine-4-carboxylate

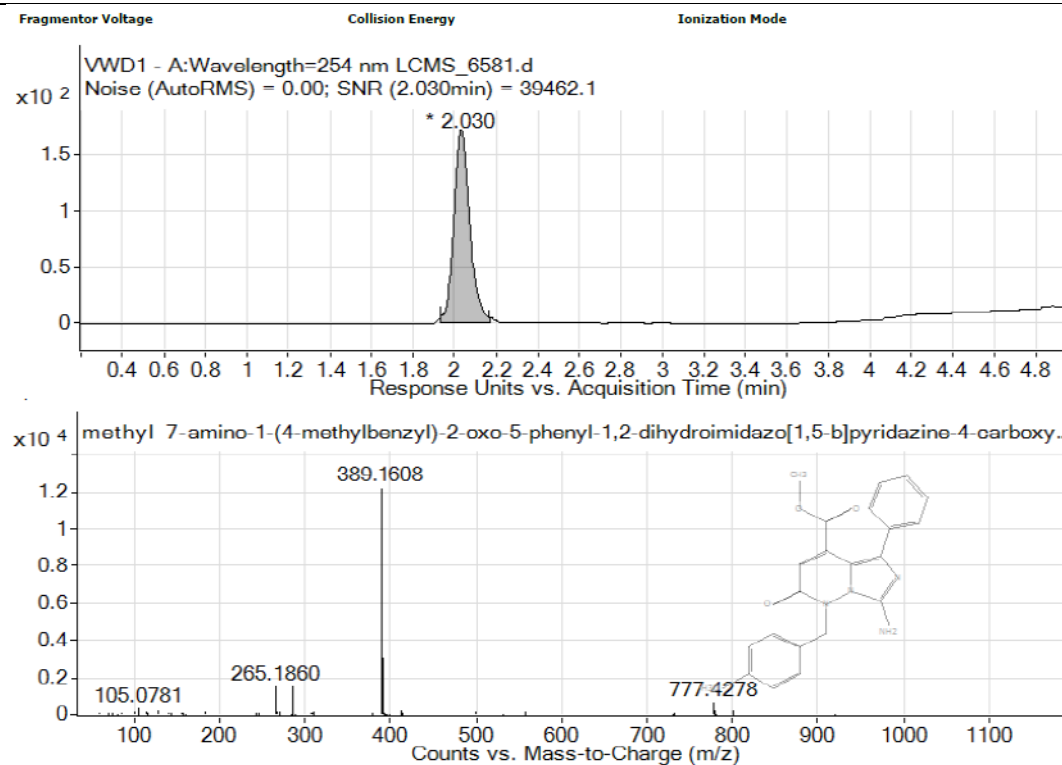

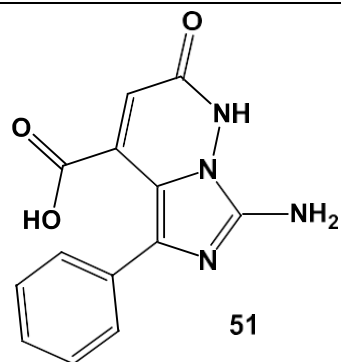

7-Amino-1,2-dihydro-2-oxo-5-phenylimidazo[1,5-b]pyridazine-4-carboxylic acid

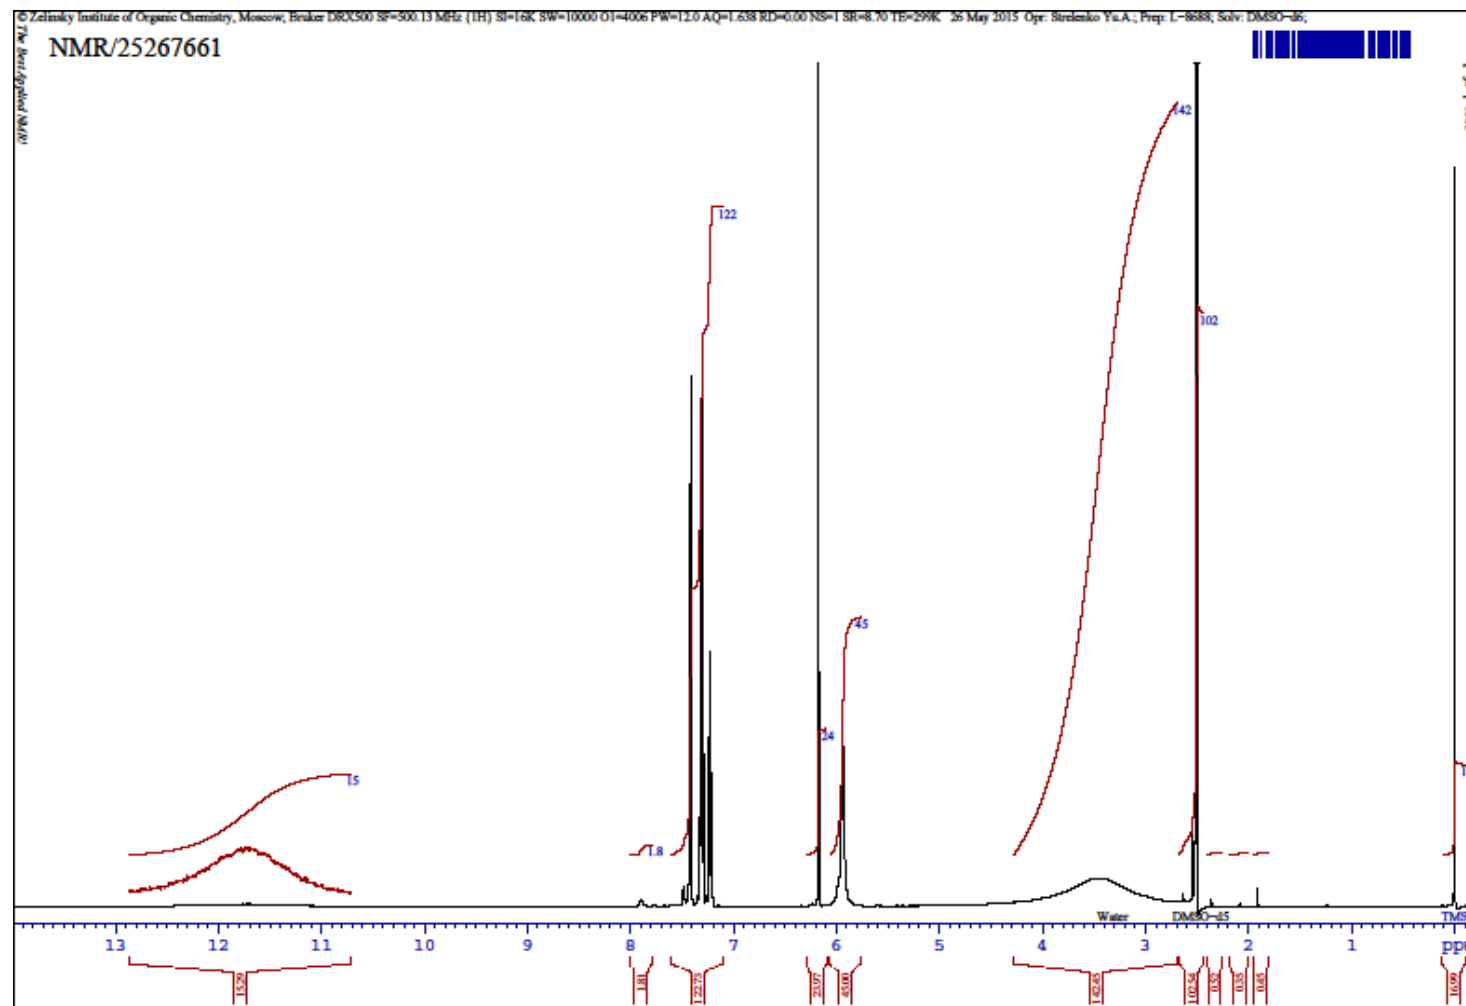



7-Amino-1,2-dihydro-2-oxo-5-phenylimidazo[1,5-b]pyridazine-4-carboxylic acid

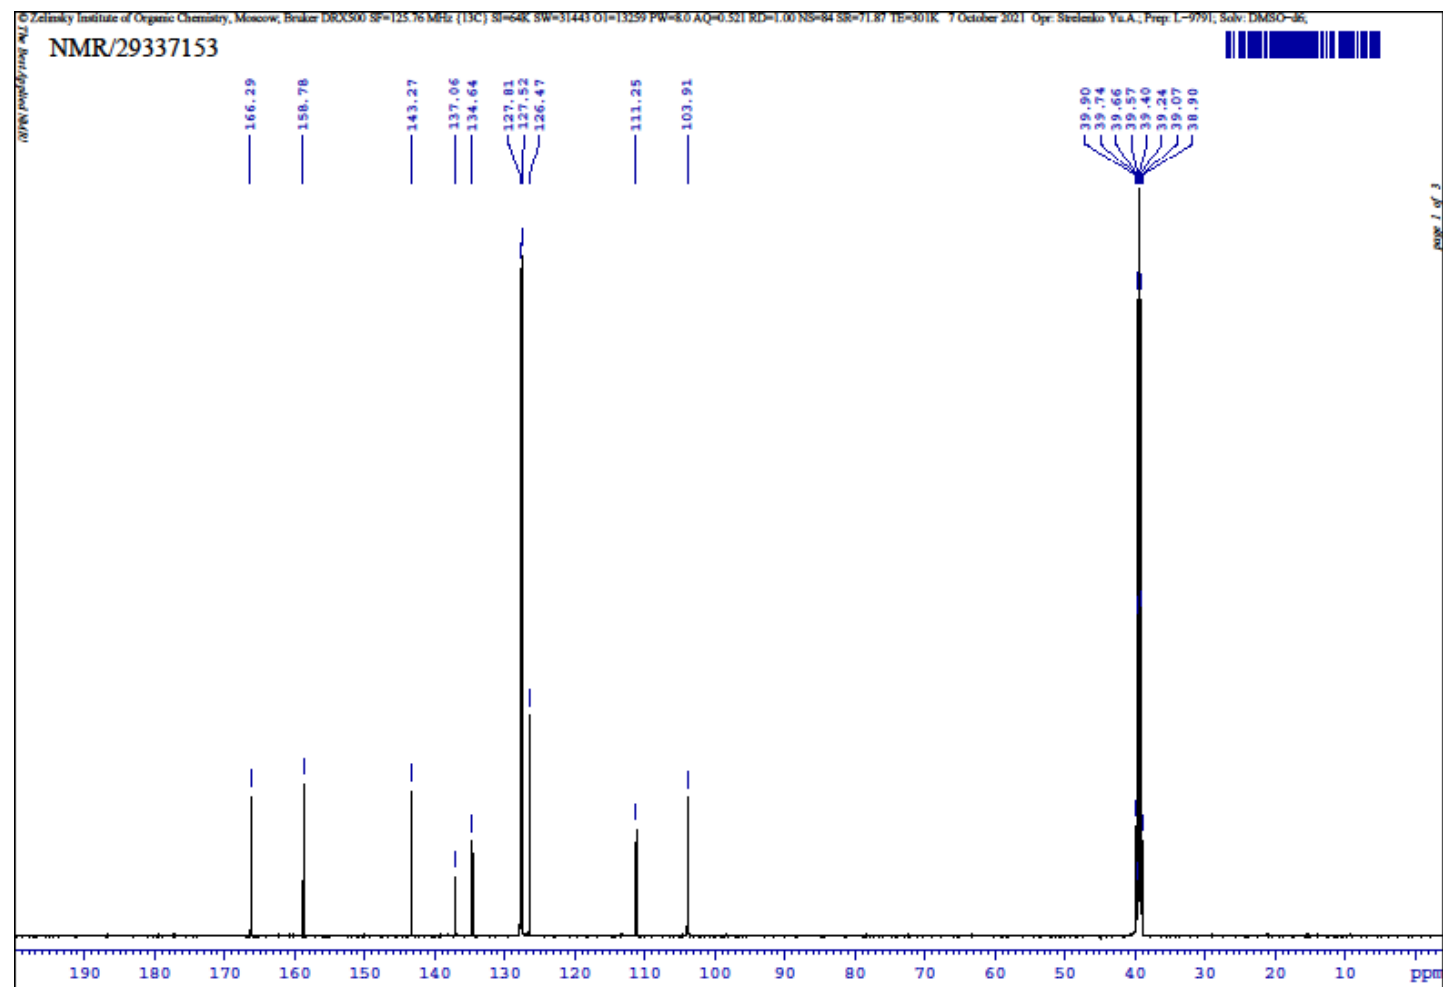

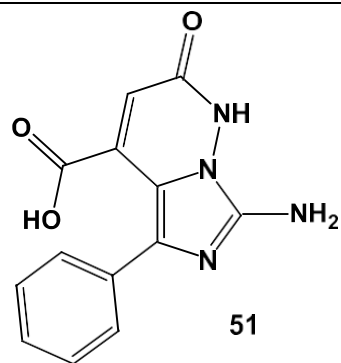

51  
7-Amino-1,2-dihydro-2-oxo-5-phenylimidazo[1,5-b]pyridazine-4-carboxylic acid

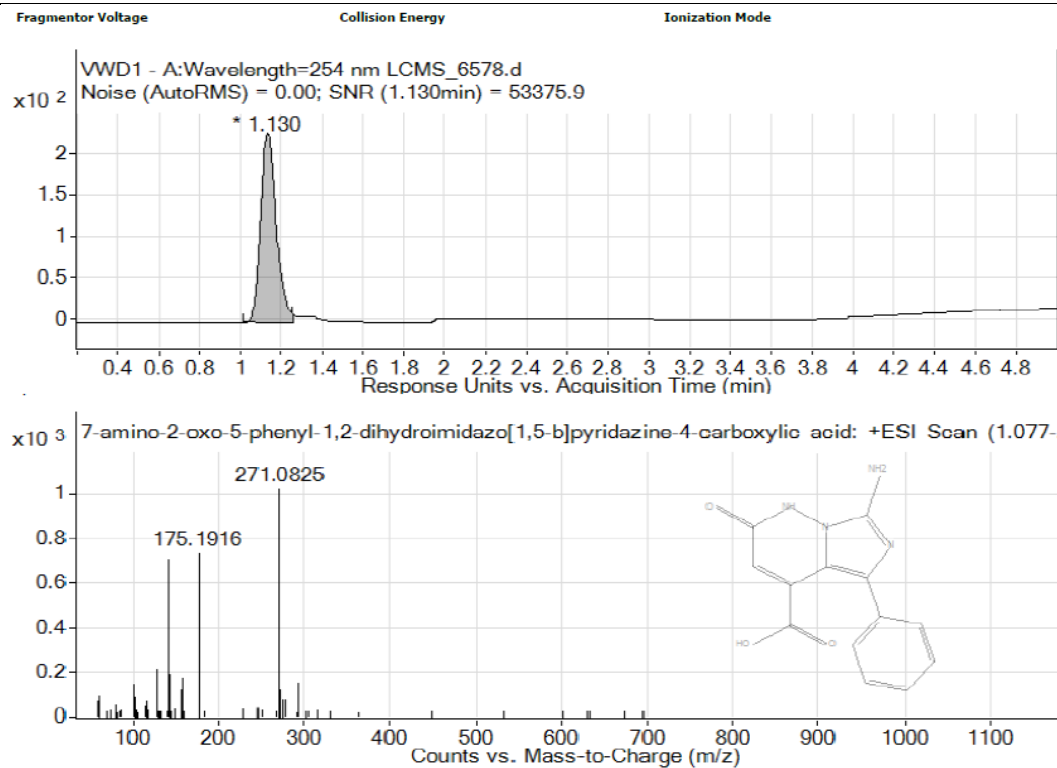

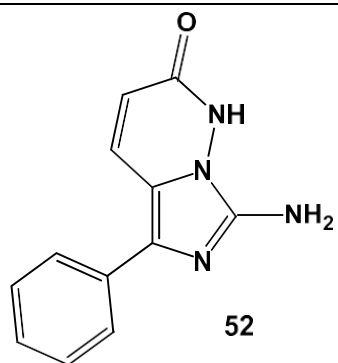

7-Amino-5-phenylimidazo[1,5-b]pyridazin-2(1H)-one

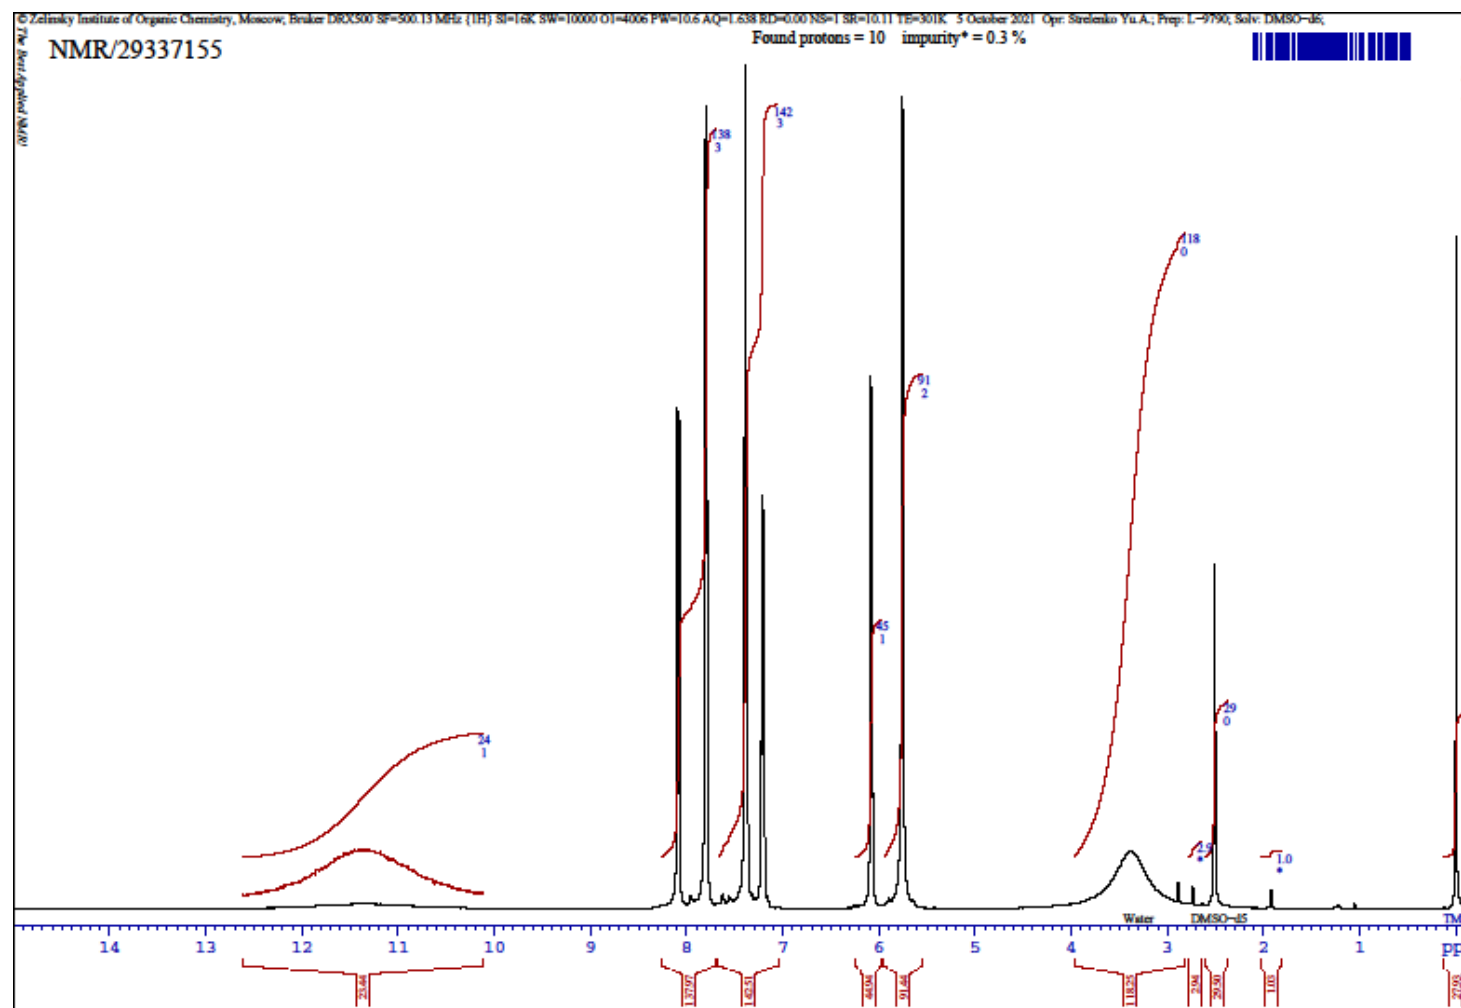



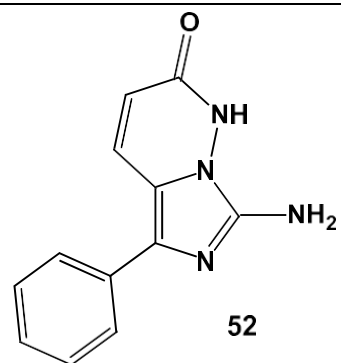

7-Amino-5-phenylimidazo[1,5-b]pyridazin-2(1H)-one

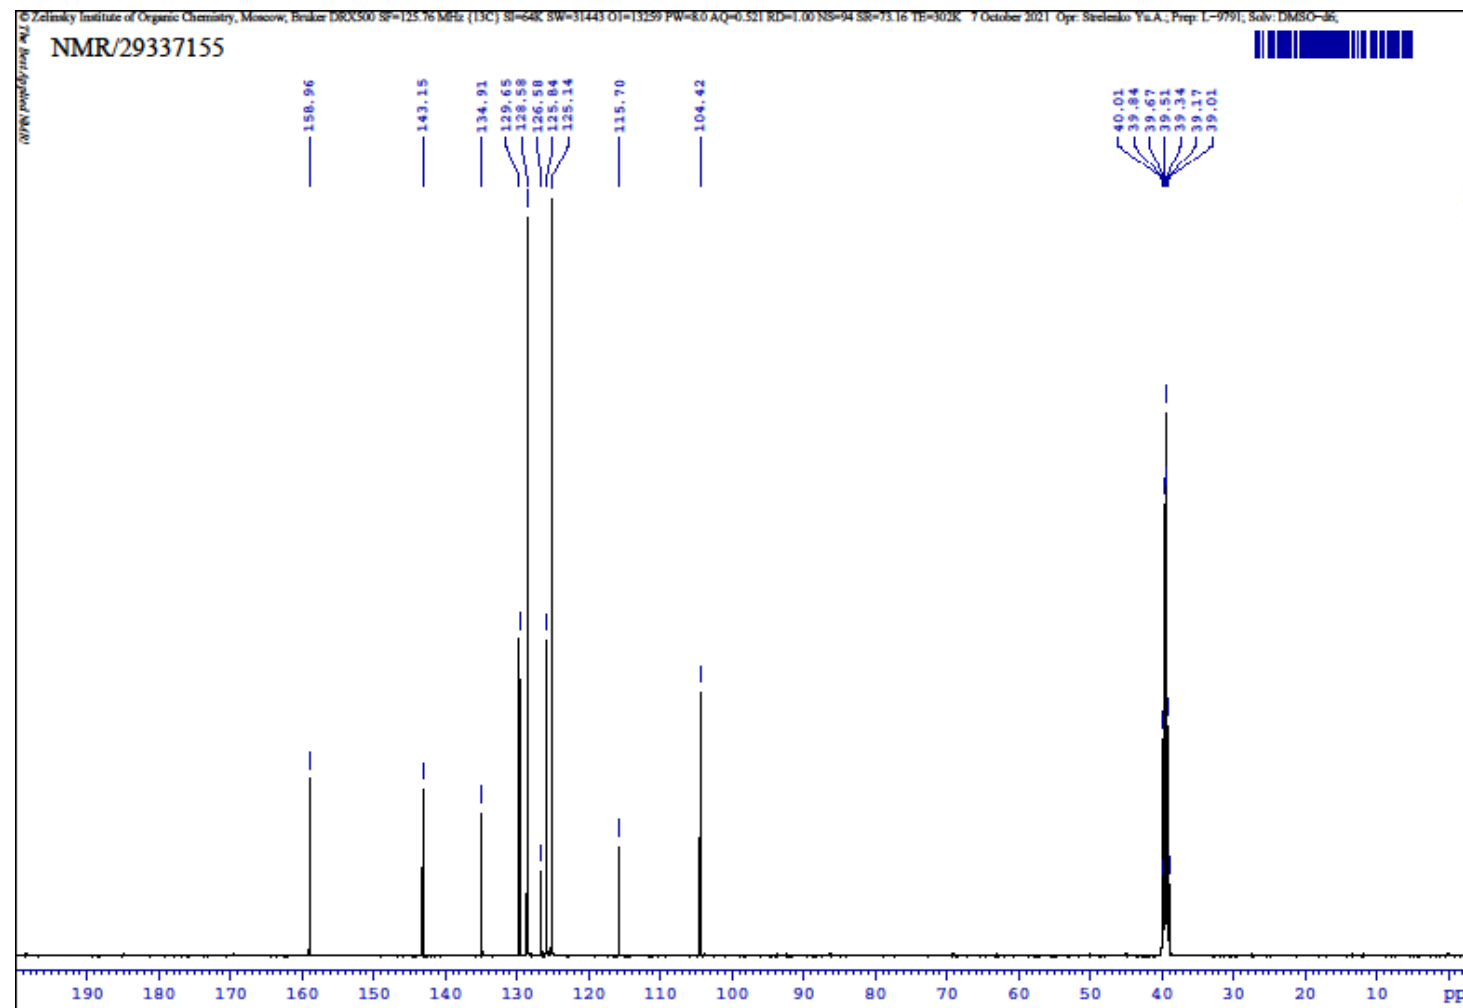

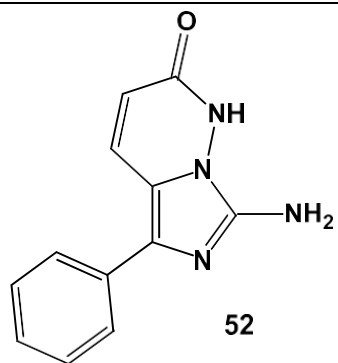

52

7-Amino-5-phenylimidazo[1,5-b]pyridazin-2(1H)-one

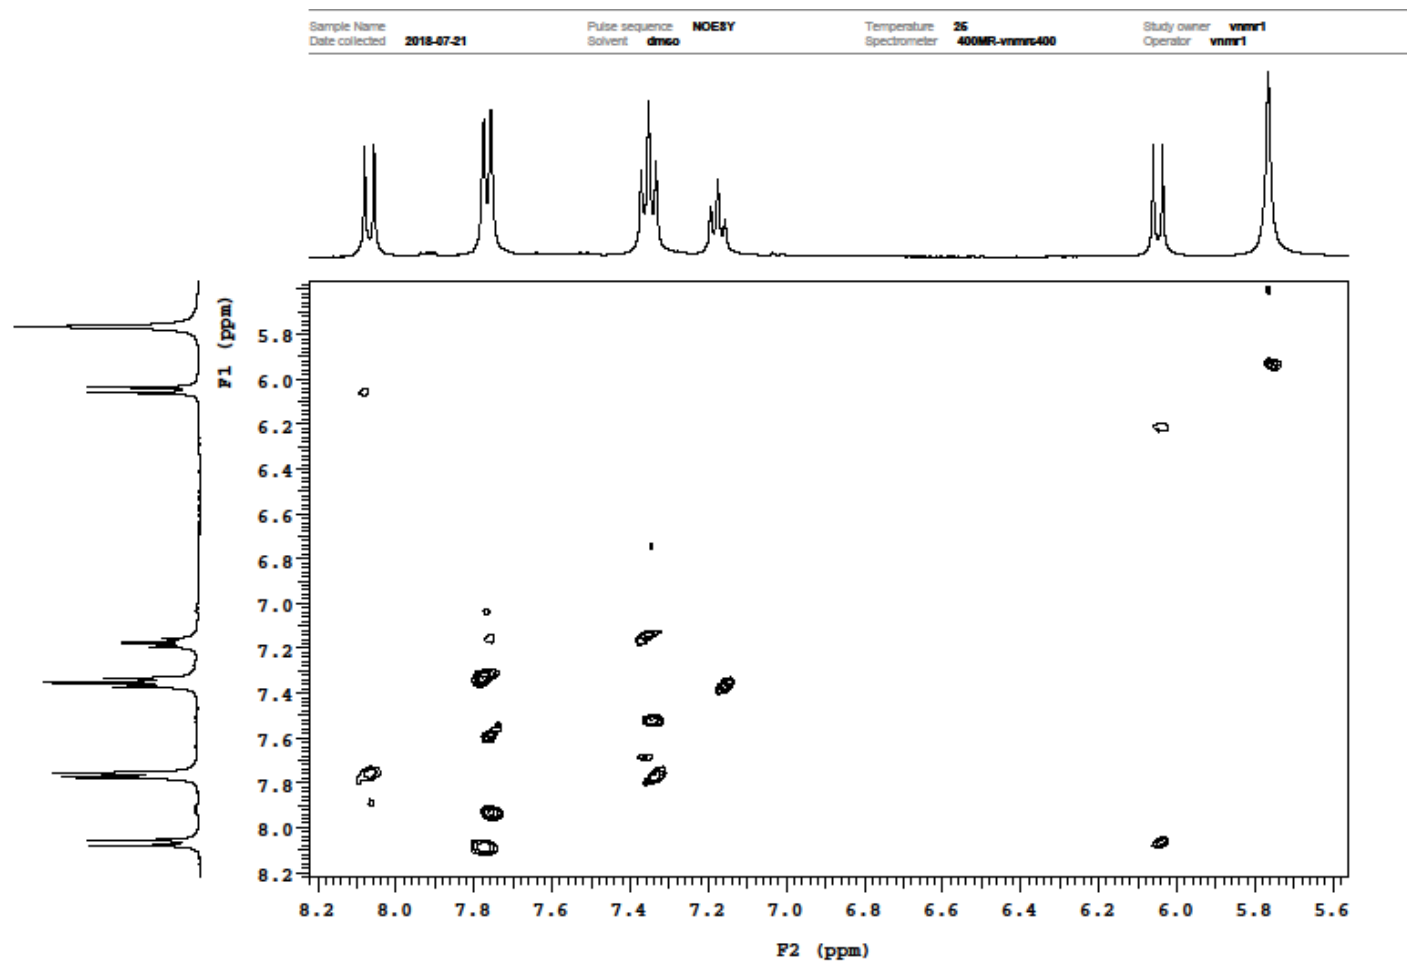



52

7-Amino-5-phenylimidazo[1,5-b]pyridazin-2(1H)-one

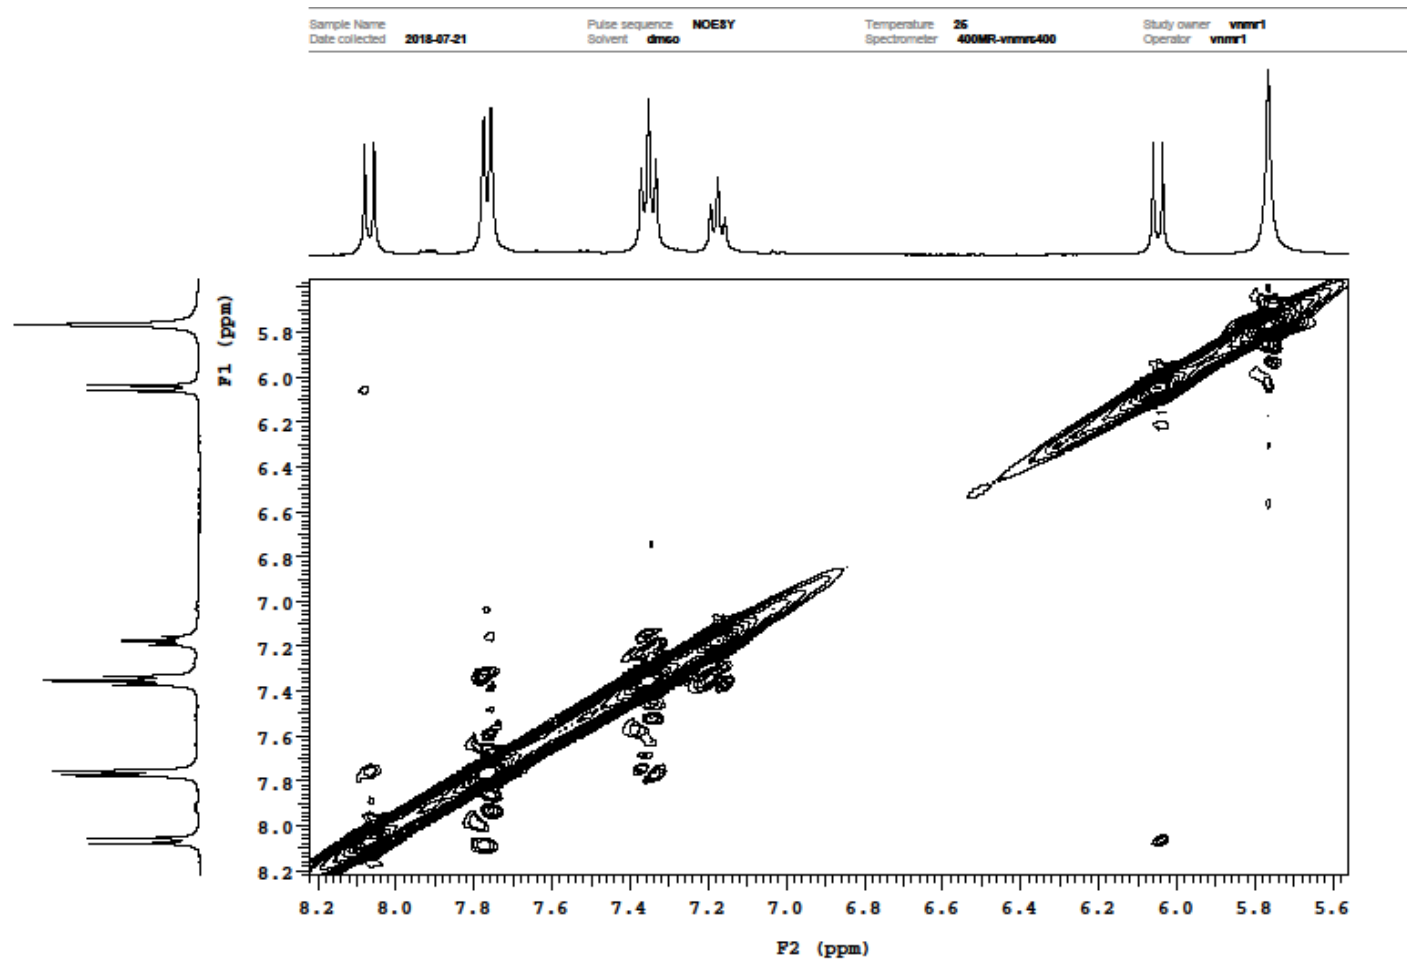



7-Amino-5-phenylimidazo[1,5-b]pyridazin-2(1H)-one

52

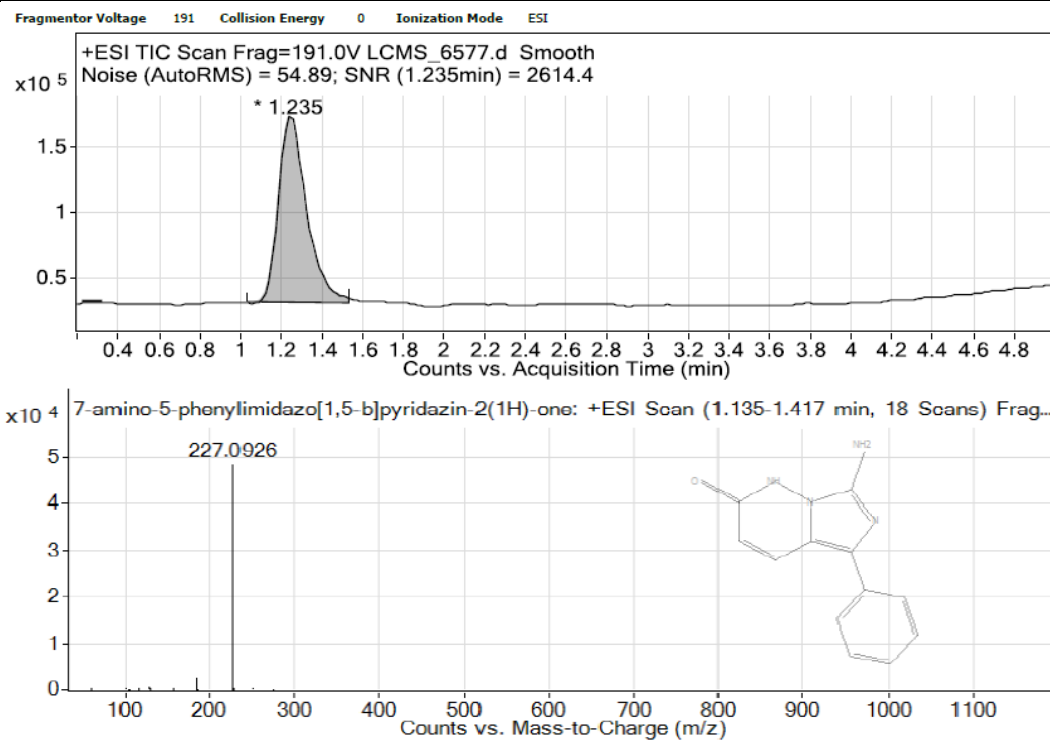

# DFT calculation

**Table S12. Optimized geometries of stationary points of the Scheme 9. PCM/B3LYP/6-311++G(d,p) calculations (Methanol, 64.7 °C). Coordinates in Angstroms. Sum of electronic and thermal Free Energies in a.u. are in parentheses.**

| <b>1</b><br>$\nu_{\text{im.}} = 0 \text{ cm}^{-1}(-533,18109)$ |              |              |              | <b>44a</b><br>$\nu_{\text{im.}} = 0 (-567.98908)$ |              |              |              |
|----------------------------------------------------------------|--------------|--------------|--------------|---------------------------------------------------|--------------|--------------|--------------|
| 6                                                              | -0.599208000 | -0.188711000 | -0.061238000 | 7                                                 | -1.013234000 | 1.096078000  | 0.049545000  |
| 6                                                              | 0.599187000  | -0.188585000 | 0.061348000  | 6                                                 | -2.270924000 | 0.714569000  | 0.036552000  |
| 6                                                              | -2.030004000 | -0.248251000 | -0.280073000 | 6                                                 | -0.255253000 | -0.074629000 | 0.002893000  |
| 8                                                              | -2.540787000 | -0.987031000 | -1.091905000 | 6                                                 | -1.088173000 | -1.163345000 | -0.037888000 |
| 8                                                              | -2.677402000 | 0.599821000  | 0.516534000  | 7                                                 | -2.377762000 | -0.651835000 | -0.016397000 |
| 6                                                              | -4.123637000 | 0.629453000  | 0.391561000  | 1                                                 | -0.922994000 | -2.225825000 | -0.075669000 |
| 1                                                              | -4.402662000 | 0.918512000  | -0.620988000 | 7                                                 | -3.534082000 | -1.437705000 | -0.086237000 |
| 1                                                              | -4.536455000 | -0.349844000 | 0.630939000  | 1                                                 | -4.106209000 | -1.133793000 | -0.869455000 |
| 1                                                              | -4.452831000 | 1.373742000  | 1.110535000  | 1                                                 | -4.068750000 | -1.350885000 | 0.773630000  |
| 6                                                              | 2.030000000  | -0.248238000 | 0.280069000  | 7                                                 | -3.377135000 | 1.540228000  | -0.022346000 |
| 8                                                              | 2.540789000  | -0.987001000 | 1.091906000  | 1                                                 | -3.152173000 | 2.501040000  | 0.199922000  |
| 8                                                              | 2.677410000  | 0.599781000  | -0.516584000 | 1                                                 | -4.188434000 | 1.222280000  | 0.493142000  |
| 6                                                              | 4.123644000  | 0.629439000  | -0.391590000 | 6                                                 | 1.212397000  | -0.039241000 | 0.004304000  |
| 1                                                              | 4.402662000  | 0.918436000  | 0.620979000  | 6                                                 | 1.895083000  | 1.186255000  | -0.057576000 |
| 1                                                              | 4.536490000  | -0.349828000 | -0.631026000 | 6                                                 | 1.974219000  | -1.219710000 | 0.064971000  |
| 1                                                              | 4.452832000  | 1.373782000  | -1.110511000 | 6                                                 | 3.288186000  | 1.229659000  | -0.063239000 |
|                                                                |              |              |              | 6                                                 | 3.364854000  | -1.174309000 | 0.057634000  |
|                                                                |              |              |              | 6                                                 | 4.032238000  | 0.051332000  | -0.006622000 |
|                                                                |              |              |              | 1                                                 | 1.321130000  | 2.103202000  | -0.103187000 |
|                                                                |              |              |              | 1                                                 | 1.477526000  | -2.181873000 | 0.122100000  |
|                                                                |              |              |              | 1                                                 | 3.793351000  | 2.188275000  | -0.112967000 |
|                                                                |              |              |              | 1                                                 | 3.930516000  | -2.098445000 | 0.105374000  |
|                                                                |              |              |              | 1                                                 | 5.115773000  | 0.085162000  | -0.011015000 |

  

| <b>TS1</b><br>$\nu_{\text{im.}} = -403.2 \text{ cm}^{-1}(-1101.11573)$ |              |              |              | <b>54</b><br>$\nu_{\text{im.}} = 0 \text{ cm}^{-1}(-1101.13298)$ |              |              |              |
|------------------------------------------------------------------------|--------------|--------------|--------------|------------------------------------------------------------------|--------------|--------------|--------------|
| 7                                                                      | 1.965759000  | 1.484722000  | -0.680306000 | 7                                                                | 2.691232000  | -0.800820000 | -0.237211000 |
| 6                                                                      | 2.624938000  | 0.411457000  | -1.147239000 | 6                                                                | 2.273625000  | -2.080739000 | -0.523370000 |
| 6                                                                      | 0.654164000  | 1.154570000  | -0.689395000 | 6                                                                | 1.681346000  | -0.007778000 | -0.487790000 |
| 6                                                                      | 0.477263000  | -0.215263000 | -1.063511000 | 6                                                                | 0.469587000  | -0.753313000 | -1.015950000 |
| 7                                                                      | 1.776963000  | -0.595932000 | -1.476265000 | 7                                                                | 1.024250000  | -2.123092000 | -0.982066000 |
| 1                                                                      | -0.344111000 | -0.591593000 | -1.651994000 | 1                                                                | 0.312661000  | -0.472582000 | -2.061764000 |
| 7                                                                      | 2.101951000  | -1.900251000 | -1.849239000 | 7                                                                | 0.311257000  | -3.232326000 | -1.422261000 |
| 1                                                                      | 2.679907000  | -2.334851000 | -1.133790000 | 1                                                                | 0.141429000  | -3.885436000 | -0.663410000 |
| 1                                                                      | 2.572342000  | -1.904710000 | -2.748668000 | 1                                                                | 0.783540000  | -3.686514000 | -2.198353000 |
| 7                                                                      | 3.961986000  | 0.324417000  | -1.230047000 | 7                                                                | 3.071663000  | -3.120818000 | -0.357345000 |
| 1                                                                      | 4.495324000  | 1.169521000  | -1.096390000 | 1                                                                | 4.007235000  | -2.969158000 | -0.011840000 |
| 1                                                                      | 4.397776000  | -0.418767000 | -1.753129000 | 1                                                                | 2.776897000  | -4.063214000 | -0.564171000 |
| 6                                                                      | -0.383864000 | 2.114060000  | -0.322894000 | 6                                                                | 1.765915000  | 1.435909000  | -0.314006000 |
| 6                                                                      | -0.026547000 | 3.415123000  | 0.074102000  | 6                                                                | 2.874113000  | 1.992772000  | 0.352063000  |
| 6                                                                      | -1.746595000 | 1.770858000  | -0.366693000 | 6                                                                | 0.766091000  | 2.286464000  | -0.817112000 |
| 6                                                                      | -1.003565000 | 4.342298000  | 0.418370000  | 6                                                                | 2.974282000  | 3.367454000  | 0.512638000  |
| 6                                                                      | -2.720196000 | 2.701758000  | -0.020405000 | 6                                                                | 0.877018000  | 3.663883000  | -0.658863000 |
| 6                                                                      | -2.353935000 | 3.990186000  | 0.372790000  | 6                                                                | 1.976724000  | 4.205750000  | 0.006539000  |
| 1                                                                      | 1.020878000  | 3.685799000  | 0.107156000  | 1                                                                | 3.641583000  | 1.336607000  | 0.741850000  |
| 1                                                                      | -2.050947000 | 0.775065000  | -0.663302000 | 1                                                                | -0.091853000 | 1.872589000  | -1.331327000 |
| 1                                                                      | -0.713079000 | 5.341456000  | 0.722438000  | 1                                                                | 3.826693000  | 3.789829000  | 1.031310000  |
| 1                                                                      | -3.766682000 | 2.422000000  | -0.057515000 | 1                                                                | 0.105827000  | 4.314164000  | -1.054037000 |
| 1                                                                      | -3.115025000 | 4.714223000  | 0.640268000  | 1                                                                | 2.058239000  | 5.279425000  | 0.131408000  |
| 6                                                                      | -1.106463000 | -1.887446000 | 0.601921000  | 6                                                                | -1.946322000 | -0.217311000 | -1.071606000 |
| 6                                                                      | -0.039997000 | -1.219709000 | 0.613061000  | 6                                                                | -0.889468000 | -0.584837000 | -0.330153000 |
| 6                                                                      | -2.238909000 | -2.439178000 | -0.039029000 | 6                                                                | -3.288009000 | -0.052213000 | -0.619815000 |
| 8                                                                      | -2.250631000 | -3.490712000 | -0.672846000 | 8                                                                | -4.180257000 | -0.901650000 | -0.689169000 |
| 8                                                                      | -3.359416000 | -1.692090000 | 0.163292000  | 8                                                                | -3.566370000 | 1.240618000  | -0.246693000 |
| 6                                                                      | -4.582859000 | -2.214160000 | -0.391951000 | 6                                                                | -4.938904000 | 1.538272000  | 0.054191000  |
| 1                                                                      | -4.509105000 | -2.300077000 | -1.476728000 | 1                                                                | -5.580146000 | 1.342872000  | -0.807406000 |
| 1                                                                      | -4.812704000 | -3.190511000 | 0.036788000  | 1                                                                | -5.290736000 | 0.951323000  | 0.904521000  |
| 1                                                                      | -5.351400000 | -1.493426000 | -0.122268000 | 1                                                                | -4.960451000 | 2.598392000  | 0.301079000  |
| 6                                                                      | 0.998281000  | -0.964282000 | 1.634387000  | 6                                                                | -0.968702000 | -0.838196000 | 1.135289000  |
| 8                                                                      | 0.783029000  | -0.448828000 | 2.709462000  | 8                                                                | -1.977165000 | -0.791182000 | 1.812872000  |
| 8                                                                      | 2.211322000  | -1.382632000 | 1.239250000  | 8                                                                | 0.242140000  | -1.132640000 | 1.670723000  |
| 6                                                                      | 3.295873000  | -1.202268000 | 2.183356000  | 6                                                                | 0.287856000  | -1.371680000 | 3.091845000  |
| 1                                                                      | 3.412285000  | -0.146134000 | 2.424327000  | 1                                                                | -0.057395000 | -0.492511000 | 3.636458000  |
| 1                                                                      | 3.097762000  | -1.771803000 | 3.090953000  | 1                                                                | -0.331709000 | -2.230371000 | 3.352340000  |

|                                                |              |              |              |                                          |              |              |              |
|------------------------------------------------|--------------|--------------|--------------|------------------------------------------|--------------|--------------|--------------|
| 1                                              | 4.180214000  | -1.580818000 | 1.678371000  | 1                                        | 1.331671000  | -1.573812000 | 3.320252000  |
| <b>TS2</b>                                     |              |              |              | <b>55</b>                                |              |              |              |
| $v_{im.} = -1724.2\text{cm}^{-1}(-1101.09963)$ |              |              |              | $v_{im.} = 0\text{cm}^{-1}(-1101.19909)$ |              |              |              |
| 7                                              | 2.744405000  | -0.887713000 | -0.723411000 | 7                                        | 2.125459000  | -2.208112000 | -0.111096000 |
| 6                                              | 2.283504000  | -2.146844000 | -0.850981000 | 6                                        | 1.146361000  | -3.081825000 | 0.038982000  |
| 6                                              | 1.675448000  | -0.106980000 | -0.487021000 | 6                                        | 1.524104000  | -0.970686000 | -0.185246000 |
| 6                                              | 0.448778000  | -0.864663000 | -0.564539000 | 6                                        | 0.143468000  | -1.084201000 | -0.070217000 |
| 7                                              | 0.946735000  | -2.212649000 | -0.698204000 | 7                                        | -0.078162000 | -2.479383000 | 0.041089000  |
| 1                                              | -0.327009000 | -0.473402000 | -1.613176000 | 1                                        | -2.385019000 | -1.267218000 | -1.002472000 |
| 7                                              | 0.121908000  | -3.317290000 | -0.898121000 | 7                                        | -1.286817000 | -3.083845000 | 0.393698000  |
| 1                                              | 0.247919000  | -3.996711000 | -0.154529000 | 1                                        | -1.171025000 | -3.608540000 | 1.256290000  |
| 1                                              | 0.298702000  | -3.742067000 | -1.804238000 | 1                                        | -1.603211000 | -3.702296000 | -0.347180000 |
| 7                                              | 3.060441000  | -3.193334000 | -1.172055000 | 7                                        | 1.304457000  | -4.421915000 | 0.270347000  |
| 1                                              | 4.059031000  | -3.053731000 | -1.155730000 | 1                                        | 2.236398000  | -4.760947000 | 0.075598000  |
| 1                                              | 2.724684000  | -4.137323000 | -1.057571000 | 1                                        | 0.578429000  | -5.038307000 | -0.069233000 |
| 6                                              | 1.849718000  | 1.328668000  | -0.245187000 | 6                                        | 2.355472000  | 0.220300000  | -0.433616000 |
| 6                                              | 3.141155000  | 1.822143000  | 0.018703000  | 6                                        | 3.563874000  | 0.379313000  | 0.264904000  |
| 6                                              | 0.776063000  | 2.235414000  | -0.275782000 | 6                                        | 2.005131000  | 1.175326000  | -1.397817000 |
| 6                                              | 3.349329000  | 3.176700000  | 0.249122000  | 6                                        | 4.386041000  | 1.474751000  | 0.019275000  |
| 6                                              | 0.991800000  | 3.592548000  | -0.052085000 | 6                                        | 2.831474000  | 2.270421000  | -1.644883000 |
| 6                                              | 2.275389000  | 4.068494000  | 0.213928000  | 6                                        | 4.022166000  | 2.425679000  | -0.936824000 |
| 1                                              | 3.972326000  | 1.129853000  | 0.046192000  | 1                                        | 3.849143000  | -0.360372000 | 1.003406000  |
| 1                                              | -0.225122000 | 1.886951000  | -0.485103000 | 1                                        | 1.093093000  | 1.052560000  | -1.968850000 |
| 1                                              | 4.349689000  | 3.538757000  | 0.457150000  | 1                                        | 5.311584000  | 1.587515000  | 0.572818000  |
| 1                                              | 0.153852000  | 4.279222000  | -0.086291000 | 1                                        | 2.547772000  | 2.996773000  | -2.398164000 |
| 1                                              | 2.438404000  | 5.125122000  | 0.393055000  | 1                                        | 4.664975000  | 3.276896000  | -1.130889000 |
| 6                                              | -1.709643000 | -0.255395000 | -0.938096000 | 6                                        | -2.174019000 | -0.349882000 | -0.474134000 |
| 6                                              | -0.886135000 | -0.617222000 | 0.066385000  | 6                                        | -0.919105000 | -0.105245000 | -0.024803000 |
| 6                                              | -3.125099000 | 0.080248000  | -0.928440000 | 6                                        | -3.330071000 | 0.528603000  | -0.253963000 |
| 8                                              | -4.027712000 | -0.721232000 | -1.121269000 | 8                                        | -3.414394000 | 1.435395000  | 0.553864000  |
| 8                                              | -3.334631000 | 1.413095000  | -0.816684000 | 8                                        | -4.350135000 | 0.174221000  | -1.067933000 |
| 6                                              | -4.701215000 | 1.864550000  | -0.928232000 | 6                                        | -5.569239000 | 0.933755000  | -0.940300000 |
| 1                                              | -5.117360000 | 1.587162000  | -1.897377000 | 1                                        | -5.966401000 | 0.846741000  | 0.071588000  |
| 1                                              | -5.311385000 | 1.437954000  | -0.131467000 | 1                                        | -5.390249000 | 1.983588000  | -1.174476000 |
| 1                                              | -4.656329000 | 2.946691000  | -0.831086000 | 1                                        | -6.258953000 | 0.497041000  | -1.658263000 |
| 6                                              | -1.210903000 | -0.749042000 | 1.504999000  | 6                                        | -0.590926000 | 1.236763000  | 0.601806000  |
| 8                                              | -2.301312000 | -0.524389000 | 1.993827000  | 8                                        | -0.594943000 | 2.290653000  | 0.012086000  |
| 8                                              | -0.145066000 | -1.152819000 | 2.222965000  | 8                                        | -0.273391000 | 1.093473000  | 1.893834000  |
| 6                                              | -0.344618000 | -1.312480000 | 3.644622000  | 6                                        | 0.054697000  | 2.304345000  | 2.615839000  |
| 1                                              | -0.639333000 | -0.363836000 | 4.093782000  | 1                                        | 0.924759000  | 2.783745000  | 2.167780000  |
| 1                                              | -1.109956000 | -2.064662000 | 3.837101000  | 1                                        | -0.793754000 | 2.988363000  | 2.604556000  |
| 1                                              | 0.615801000  | -1.637161000 | 4.036732000  | 1                                        | 0.274249000  | 1.982804000  | 3.630394000  |
| <b>TS3</b>                                     |              |              |              | <b>45a</b>                               |              |              |              |
| $v_{im.} = -677.4\text{cm}^{-1}(-1101.12660)$  |              |              |              | $v_{im.} = 0\text{cm}^{-1}(-1101.19909)$ |              |              |              |
| 7                                              | 0.394072000  | 2.503318000  | -0.217839000 | 7                                        | -0.304793000 | -2.427925000 | 0.072134000  |
| 6                                              | -0.908305000 | 2.505474000  | -0.427636000 | 6                                        | -1.626974000 | -2.302706000 | 0.067182000  |
| 6                                              | 0.778347000  | 1.185479000  | -0.078929000 | 6                                        | 0.222553000  | -1.166607000 | -0.016633000 |
| 6                                              | -0.311880000 | 0.341817000  | -0.251632000 | 6                                        | -0.807746000 | -0.222255000 | -0.040252000 |
| 7                                              | -1.383526000 | 1.225350000  | -0.477085000 | 7                                        | -1.977014000 | -0.997448000 | 0.018524000  |
| 1                                              | -2.003346000 | -2.635679000 | -0.325496000 | 1                                        | -2.391271000 | 2.789080000  | -0.280071000 |
| 7                                              | -2.731389000 | 0.831726000  | -0.535448000 | 7                                        | -3.255617000 | -0.468005000 | -0.055863000 |
| 1                                              | -3.197280000 | 1.200183000  | -1.366903000 | 1                                        | -3.971200000 | -1.013583000 | 0.412729000  |
| 1                                              | -3.246558000 | 0.913159000  | 0.451480000  | 7                                        | -2.552562000 | -3.313380000 | 0.187958000  |
| 7                                              | -1.690818000 | 3.600858000  | -0.662574000 | 1                                        | -2.123442000 | -4.229704000 | 0.167936000  |
| 1                                              | -1.228700000 | 4.476369000  | -0.456582000 | 1                                        | -3.339935000 | -3.264568000 | -0.449546000 |
| 1                                              | -2.644399000 | 3.575028000  | -0.324754000 | 6                                        | 1.677385000  | -0.980409000 | -0.137763000 |
| 6                                              | 2.170346000  | 0.868543000  | 0.277815000  | 6                                        | 2.545112000  | -1.713830000 | 0.685459000  |
| 6                                              | 3.224451000  | 1.542429000  | -0.356773000 | 6                                        | 2.226743000  | -0.121828000 | -1.100859000 |
| 6                                              | 2.471022000  | -0.058410000 | 1.286175000  | 6                                        | 3.924865000  | -1.573229000 | 0.562888000  |
| 6                                              | 4.545776000  | 1.275051000  | -0.009029000 | 6                                        | 3.607985000  | 0.018073000  | -1.221650000 |
| 6                                              | 3.794188000  | -0.324349000 | 1.633029000  | 6                                        | 4.461896000  | -0.704368000 | -0.388621000 |
| 6                                              | 4.835958000  | 0.338614000  | 0.984783000  | 1                                        | 2.130304000  | -2.387744000 | 1.425511000  |
| 1                                              | 3.001126000  | 2.269537000  | -1.128226000 | 1                                        | 1.574739000  | 0.415729000  | -1.780010000 |
| 1                                              | 1.668560000  | -0.551596000 | 1.822772000  | 1                                        | 4.582143000  | -2.141209000 | 1.211749000  |
| 1                                              | 5.350310000  | 1.797555000  | -0.514270000 | 1                                        | 4.015736000  | 0.681204000  | -1.976212000 |
| 1                                              | 4.009186000  | -1.039217000 | 2.419167000  | 1                                        | 5.536364000  | -0.597441000 | -0.484592000 |
| 1                                              | 5.865121000  | 0.133594000  | 1.256740000  | 6                                        | -2.240083000 | 1.720510000  | -0.219736000 |
| 6                                              | -1.834124000 | -1.567381000 | -0.298051000 | 6                                        | -0.988551000 | 1.188798000  | -0.120934000 |
| 6                                              | -0.574752000 | -1.068612000 | -0.252398000 | 6                                        | -3.445156000 | 0.908977000  | -0.110284000 |
| 6                                              | -3.039316000 | -0.760700000 | -0.448859000 | 8                                        | -4.585456000 | 1.361116000  | -0.043492000 |
| 8                                              | -4.076345000 | -1.080110000 | -0.983052000 | 6                                        | 0.158881000  | 2.160401000  | -0.041519000 |

|                                                  |              |              |              |   |             |             |              |
|--------------------------------------------------|--------------|--------------|--------------|---|-------------|-------------|--------------|
| 8                                                | -3.443826000 | -0.176455000 | 1.414347000  | 8 | 0.325337000 | 3.065745000 | -0.826504000 |
| 6                                                | -4.671938000 | -0.658896000 | 1.890381000  | 8 | 0.913108000 | 1.931141000 | 1.031817000  |
| 1                                                | -5.271227000 | -1.088396000 | 1.070807000  | 6 | 2.031783000 | 2.827927000 | 1.245089000  |
| 1                                                | -4.527509000 | -1.435698000 | 2.653950000  | 1 | 2.726661000 | 2.758164000 | 0.408864000  |
| 1                                                | -5.265913000 | 0.150271000  | 2.337094000  | 1 | 1.673871000 | 3.851343000 | 1.352186000  |
| 6                                                | 0.531319000  | -2.087653000 | -0.309276000 | 1 | 2.499858000 | 2.485287000 | 2.163415000  |
| 8                                                | 0.555635000  | -3.092625000 | 0.365649000  |   |             |             |              |
| 8                                                | 1.432647000  | -1.781614000 | -1.243628000 |   |             |             |              |
| 6                                                | 2.529108000  | -2.711340000 | -1.416989000 |   |             |             |              |
| 1                                                | 3.106564000  | -2.780227000 | -0.495511000 |   |             |             |              |
| 1                                                | 2.146714000  | -3.693377000 | -1.693841000 |   |             |             |              |
| 1                                                | 3.132912000  | -2.294252000 | -2.218009000 |   |             |             |              |
| <b>CH<sub>3</sub>OH</b>                          |              |              |              |   |             |             |              |
| $\nu_{\text{im.}} = 0\text{cm}^{-1}(-115.74626)$ |              |              |              |   |             |             |              |
| 1                                                | 1.146969000  | -0.755172000 | 0.000004000  |   |             |             |              |
| 8                                                | 0.752515000  | 0.122872000  | 0.000001000  |   |             |             |              |
| 6                                                | -0.671353000 | -0.019805000 | 0.000000000  |   |             |             |              |
| 1                                                | -1.090218000 | 0.986428000  | -0.000251000 |   |             |             |              |
| 1                                                | -1.024356000 | -0.547914000 | -0.891719000 |   |             |             |              |
| 1                                                | -1.024395000 | -0.547487000 | 0.891959000  |   |             |             |              |

**Table S13. Optimized geometries of stationary points of the Scheme 10. PCM/B3LYP/6-311++G(d,p) calculations (Methanol, 64.7 °C). Coordinates in Angstroms. Sum of electronic and thermal Free Energies in a.u. are in parentheses.**

|                                                         |              |              |              |                                                    |              |              |              |
|---------------------------------------------------------|--------------|--------------|--------------|----------------------------------------------------|--------------|--------------|--------------|
| <b>TS4</b>                                              |              |              |              | <b>56</b>                                          |              |              |              |
| $\nu_{\text{im.}} = -249.5\text{cm}^{-1}(-1101.11891)$  |              |              |              | $\nu_{\text{im.}} = 0\text{ cm}^{-1}(-1101.13791)$ |              |              |              |
| 7                                                       | 0.224306000  | 0.742692000  | -0.205663000 | 7                                                  | -0.415246000 | 1.099756000  | -0.224734000 |
| 6                                                       | 0.846818000  | 1.915531000  | -0.238670000 | 6                                                  | -0.546113000 | 2.439113000  | -0.252653000 |
| 6                                                       | -1.045676000 | 0.925784000  | -0.764555000 | 6                                                  | -1.684410000 | 0.514714000  | -0.442853000 |
| 6                                                       | -1.168321000 | 2.230428000  | -1.142945000 | 6                                                  | -2.563915000 | 1.536967000  | -0.582798000 |
| 7                                                       | 0.030491000  | 2.851759000  | -0.808362000 | 7                                                  | -1.850558000 | 2.727929000  | -0.462793000 |
| 1                                                       | -1.943451000 | 2.774018000  | -1.654015000 | 1                                                  | -3.617242000 | 1.548183000  | -0.797022000 |
| 7                                                       | 0.301635000  | 4.198813000  | -1.059986000 | 7                                                  | -2.433186000 | 3.989628000  | -0.586623000 |
| 1                                                       | 1.074726000  | 4.289985000  | -1.712881000 | 1                                                  | -2.048316000 | 4.482542000  | -1.387041000 |
| 1                                                       | 0.515903000  | 4.684226000  | -0.193914000 | 1                                                  | -2.298194000 | 4.527645000  | 0.264110000  |
| 7                                                       | 2.073921000  | 2.210621000  | 0.277096000  | 7                                                  | 0.439208000  | 3.330115000  | -0.042810000 |
| 1                                                       | 2.743080000  | 1.443276000  | 0.316335000  | 1                                                  | 1.370643000  | 2.984772000  | -0.250660000 |
| 1                                                       | 2.485020000  | 3.078799000  | -0.037257000 | 1                                                  | 0.261168000  | 4.294349000  | -0.285368000 |
| 6                                                       | -2.008371000 | -0.168462000 | -0.933246000 | 6                                                  | -1.934643000 | -0.929714000 | -0.532784000 |
| 6                                                       | -1.576968000 | -1.495884000 | -1.082000000 | 6                                                  | -1.073529000 | -1.783243000 | -1.239262000 |
| 6                                                       | -3.387807000 | 0.095867000  | -0.974149000 | 6                                                  | -3.091126000 | -1.465844000 | 0.054472000  |
| 6                                                       | -2.497434000 | -2.525804000 | -1.267140000 | 6                                                  | -1.363970000 | -3.141324000 | -1.348968000 |
| 6                                                       | -4.303868000 | -0.933619000 | -1.169254000 | 6                                                  | -3.382272000 | -2.821780000 | -0.067855000 |
| 6                                                       | -3.863833000 | -2.250770000 | -1.314153000 | 6                                                  | -2.517839000 | -3.665153000 | -0.766431000 |
| 1                                                       | -0.517455000 | -1.718031000 | -1.065209000 | 1                                                  | -0.185302000 | -1.384635000 | -1.712366000 |
| 1                                                       | -3.744124000 | 1.110787000  | -0.838117000 | 1                                                  | -3.754014000 | -0.819818000 | 0.618244000  |
| 1                                                       | -2.144197000 | -3.544577000 | -1.381898000 | 1                                                  | -0.690674000 | -3.788650000 | -1.899130000 |
| 1                                                       | -5.364335000 | -0.709002000 | -1.196387000 | 1                                                  | -4.278771000 | -3.221141000 | 0.392481000  |
| 1                                                       | -4.578632000 | -3.052728000 | -1.459064000 | 1                                                  | -2.741124000 | -4.722159000 | -0.854774000 |
| 6                                                       | 0.892196000  | -0.648378000 | 1.116621000  | 6                                                  | 0.853872000  | 0.430527000  | 0.076980000  |
| 6                                                       | 2.002600000  | -1.165499000 | 0.864844000  | 6                                                  | 1.910460000  | 0.671795000  | -0.695668000 |
| 6                                                       | -0.146862000 | -0.680216000 | 2.160813000  | 6                                                  | 0.854096000  | -0.359110000 | 1.343789000  |
| 8                                                       | -0.315194000 | -1.660215000 | 2.857749000  | 8                                                  | 1.729287000  | -1.140208000 | 1.658483000  |
| 8                                                       | -0.828236000 | 0.457293000  | 2.295523000  | 8                                                  | -0.203995000 | -0.084717000 | 2.132104000  |
| 6                                                       | -1.830152000 | 0.480744000  | 3.338533000  | 6                                                  | -0.267081000 | -0.784382000 | 3.393362000  |
| 1                                                       | -2.576037000 | -0.293493000 | 3.160298000  | 1                                                  | -0.290853000 | -1.861607000 | 3.228255000  |
| 1                                                       | -1.363709000 | 0.329348000  | 4.311904000  | 1                                                  | 0.592447000  | -0.526032000 | 4.012374000  |
| 1                                                       | -2.280369000 | 1.467873000  | 3.278984000  | 1                                                  | -1.188398000 | -0.450194000 | 3.863797000  |
| 6                                                       | 3.143199000  | -1.101996000 | 0.021129000  | 6                                                  | 3.236036000  | 0.195225000  | -0.447689000 |
| 8                                                       | 3.950960000  | -0.175076000 | 0.041043000  | 8                                                  | 4.095682000  | 0.788896000  | 0.203024000  |
| 8                                                       | 3.266860000  | -2.170161000 | -0.787940000 | 8                                                  | 3.525676000  | -0.940636000 | -1.150319000 |
| 6                                                       | 4.394872000  | -2.169145000 | -1.691610000 | 6                                                  | 4.882278000  | -1.412708000 | -1.076681000 |
| 1                                                       | 4.348726000  | -1.308057000 | -2.358501000 | 1                                                  | 5.577306000  | -0.660625000 | -1.453880000 |
| 1                                                       | 5.329292000  | -2.152875000 | -1.130586000 | 1                                                  | 5.150263000  | -1.671352000 | -0.051027000 |
| 1                                                       | 4.307004000  | -3.092958000 | -2.257605000 | 1                                                  | 4.915269000  | -2.300459000 | -1.705366000 |
| <b>TS5</b>                                              |              |              |              | <b>57</b>                                          |              |              |              |
| $\nu_{\text{im.}} = -1307.1\text{cm}^{-1}(-1101.13233)$ |              |              |              | $\nu_{\text{im.}} = 0\text{ cm}^{-1}(-1101.16720)$ |              |              |              |

|   |              |              |              |   |              |              |              |
|---|--------------|--------------|--------------|---|--------------|--------------|--------------|
| 7 | -0.139164000 | 1.152850000  | -0.041770000 | 7 | -0.176435000 | 1.133340000  | -0.236194000 |
| 6 | 0.139502000  | 2.496280000  | -0.016541000 | 6 | 0.026256000  | 2.529664000  | -0.147817000 |
| 6 | -1.546027000 | 0.984234000  | -0.145958000 | 6 | -1.576515000 | 0.856886000  | -0.270773000 |
| 6 | -2.090332000 | 2.222853000  | -0.094012000 | 6 | -2.211250000 | 2.043751000  | -0.177905000 |
| 7 | -1.054433000 | 3.151026000  | 0.005733000  | 7 | -1.258892000 | 3.051084000  | -0.078582000 |
| 1 | -3.111867000 | 2.546447000  | -0.181293000 | 1 | -3.259166000 | 2.278351000  | -0.243995000 |
| 1 | -1.245840000 | 4.532276000  | -0.024985000 | 7 | -1.579904000 | 4.405433000  | -0.051401000 |
| 1 | -0.808721000 | 4.927363000  | -0.853930000 | 1 | -1.193070000 | 4.874752000  | -0.867109000 |
| 1 | -0.847370000 | 4.956344000  | 0.807861000  | 1 | -1.207257000 | 4.835579000  | 0.790992000  |
| 7 | 1.365248000  | 2.967899000  | -0.057748000 | 7 | 1.162865000  | 3.125528000  | -0.125612000 |
| 1 | 2.081921000  | 2.018323000  | -0.258582000 | 1 | 2.199905000  | 1.102251000  | -1.303430000 |
| 1 | 1.515570000  | 3.965452000  | 0.009259000  | 1 | 1.039176000  | 4.124546000  | 0.022189000  |
| 6 | -2.235165000 | -0.285726000 | -0.412811000 | 6 | -2.156191000 | -0.466777000 | -0.527322000 |
| 6 | -1.754017000 | -1.183431000 | -1.378204000 | 6 | -1.629068000 | -1.315287000 | -1.514949000 |
| 6 | -3.438866000 | -0.579435000 | 0.244762000  | 6 | -3.302782000 | -0.875914000 | 0.172252000  |
| 6 | -2.458371000 | -2.349160000 | -1.670713000 | 6 | -2.235077000 | -2.537039000 | -1.793244000 |
| 6 | -4.146510000 | -1.739248000 | -0.060528000 | 6 | -3.913271000 | -2.093357000 | -0.118903000 |
| 6 | -3.657180000 | -2.630891000 | -1.015644000 | 6 | -3.380283000 | -2.930376000 | -1.099526000 |
| 1 | -0.839075000 | -0.962975000 | -1.915743000 | 1 | -0.753073000 | -1.012509000 | -2.076632000 |
| 1 | -3.811251000 | 0.097724000  | 1.004618000  | 1 | -3.707036000 | -0.239734000 | 0.951104000  |
| 1 | -2.074428000 | -3.031933000 | -2.420094000 | 1 | -1.817135000 | -3.178965000 | -2.560404000 |
| 1 | -5.075136000 | -1.952037000 | 0.456887000  | 1 | -4.798718000 | -2.393461000 | 0.430007000  |
| 1 | -4.204791000 | -3.537250000 | -1.246980000 | 1 | -3.851116000 | -3.881609000 | -1.319530000 |
| 6 | 0.916051000  | 0.173153000  | 0.059939000  | 6 | 0.841222000  | 0.198853000  | 0.006396000  |
| 6 | 2.165099000  | 0.546524000  | -0.247850000 | 6 | 2.053825000  | 0.334566000  | -0.557675000 |
| 6 | 0.612418000  | -1.113760000 | 0.760885000  | 6 | 0.527040000  | -0.910794000 | 0.989694000  |
| 8 | 1.176527000  | -2.161218000 | 0.523057000  | 8 | 0.722594000  | -2.083754000 | 0.784309000  |
| 8 | -0.275315000 | -0.954739000 | 1.754035000  | 8 | 0.004393000  | -0.406910000 | 2.111395000  |
| 6 | -0.597956000 | -2.131271000 | 2.529022000  | 6 | -0.352746000 | -1.358825000 | 3.142859000  |
| 1 | -1.020275000 | -2.901625000 | 1.883981000  | 1 | -1.106546000 | -2.049805000 | 2.766189000  |
| 1 | 0.294765000  | -2.511411000 | 3.025493000  | 1 | 0.530903000  | -1.909181000 | 3.464747000  |
| 1 | -1.330797000 | -1.801875000 | 3.260821000  | 1 | -0.751564000 | -0.761582000 | 3.958073000  |
| 6 | 3.349862000  | -0.265403000 | -0.051453000 | 6 | 3.255558000  | -0.437635000 | -0.182572000 |
| 8 | 3.996310000  | -0.331371000 | 0.985483000  | 8 | 3.478891000  | -0.953114000 | 0.893533000  |
| 8 | 3.762901000  | -0.856411000 | -1.200486000 | 8 | 4.127249000  | -0.457448000 | -1.209797000 |
| 6 | 5.001301000  | -1.591925000 | -1.137552000 | 6 | 5.375504000  | -1.147265000 | -0.983231000 |
| 1 | 5.823079000  | -0.937011000 | -0.845084000 | 1 | 5.915085000  | -0.688096000 | -0.154577000 |
| 1 | 4.922885000  | -2.417543000 | -0.429187000 | 1 | 5.192324000  | -2.199652000 | -0.765603000 |
| 1 | 5.162564000  | -1.973199000 | -2.143398000 | 1 | 5.935503000  | -1.041468000 | -1.908712000 |

**Table S14. Optimized geometries of stationary points of the Scheme 11. PCM/B3LYP/6-311++G(d,p) calculations (Methanol, 64.7 °C). Coordinates in Angstroms. Sum of electronic and thermal Free Energies in a.u. are in parentheses.**

| TS6                                                    |              |              |              | 58                                                 |              |              |              |
|--------------------------------------------------------|--------------|--------------|--------------|----------------------------------------------------|--------------|--------------|--------------|
| V <sub>im</sub> = -223.0cm <sup>-1</sup> (-1101.11271) |              |              |              | V <sub>im</sub> = 0 cm <sup>-1</sup> (-1101.11690) |              |              |              |
| 7                                                      | -1.213953000 | 1.111637000  | 0.096488000  | 7                                                  | -1.343920000 | 0.504050000  | -0.702693000 |
| 6                                                      | -0.201891000 | 1.098583000  | -0.731139000 | 6                                                  | -0.328914000 | -0.097066000 | -1.254666000 |
| 6                                                      | -2.234644000 | 0.427575000  | -0.547975000 | 6                                                  | -2.280991000 | -0.493622000 | -0.480061000 |
| 6                                                      | -1.788306000 | -0.004803000 | -1.777446000 | 6                                                  | -1.770391000 | -1.700316000 | -0.912752000 |
| 7                                                      | -0.483352000 | 0.423996000  | -1.883021000 | 7                                                  | -0.516263000 | -1.434333000 | -1.412585000 |
| 1                                                      | -2.240597000 | -0.569365000 | -2.573981000 | 1                                                  | -2.157921000 | -2.704139000 | -0.925837000 |
| 7                                                      | 0.335164000  | 0.168280000  | -2.991300000 | 7                                                  | 0.356670000  | -2.405457000 | -1.932281000 |
| 1                                                      | 1.190174000  | -0.280015000 | -2.673439000 | 1                                                  | 1.291628000  | -2.197182000 | -1.553357000 |
| 1                                                      | 0.551503000  | 1.035888000  | -3.474293000 | 1                                                  | 0.363858000  | -2.336440000 | -2.947679000 |
| 7                                                      | 1.068881000  | 1.644864000  | -0.449946000 | 7                                                  | 0.896867000  | 0.579088000  | -1.617834000 |
| 1                                                      | 0.995133000  | 2.304813000  | 0.322576000  | 1                                                  | 0.683600000  | 1.583077000  | -1.683953000 |
| 1                                                      | 1.482845000  | 2.137934000  | -1.240109000 | 1                                                  | 1.222070000  | 0.277867000  | -2.540847000 |
| 6                                                      | -3.553617000 | 0.244347000  | 0.073647000  | 6                                                  | -3.587452000 | -0.203488000 | 0.127377000  |
| 6                                                      | -3.783293000 | 0.670982000  | 1.390653000  | 6                                                  | -3.966899000 | 1.120421000  | 0.395434000  |
| 6                                                      | -4.611314000 | -0.358783000 | -0.626891000 | 6                                                  | -4.483292000 | -1.235311000 | 0.451112000  |
| 6                                                      | -5.029967000 | 0.497709000  | 1.988145000  | 6                                                  | -5.205095000 | 1.403229000  | 0.967824000  |
| 6                                                      | -5.855052000 | -0.533053000 | -0.026977000 | 6                                                  | -5.720451000 | -0.949851000 | 1.021499000  |
| 6                                                      | -6.072265000 | -0.105497000 | 1.284318000  | 6                                                  | -6.088847000 | 0.371108000  | 1.282946000  |
| 1                                                      | -2.976484000 | 1.137606000  | 1.941766000  | 1                                                  | -3.284788000 | 1.925117000  | 0.151310000  |
| 1                                                      | -4.466727000 | -0.691857000 | -1.648342000 | 1                                                  | -4.214217000 | -2.268433000 | 0.262876000  |
| 1                                                      | -5.186327000 | 0.833955000  | 3.007243000  | 1                                                  | -5.479976000 | 2.433166000  | 1.166793000  |
| 1                                                      | -6.657804000 | -1.001090000 | -0.585820000 | 1                                                  | -6.397314000 | -1.761119000 | 1.265029000  |
| 1                                                      | -7.041865000 | -0.240590000 | 1.749815000  | 1                                                  | -7.052153000 | 0.591776000  | 1.728326000  |
| 6                                                      | 2.315628000  | 0.344370000  | 0.055933000  | 6                                                  | 2.072667000  | 0.403688000  | -0.618455000 |
| 6                                                      | 1.967984000  | -0.849290000 | -0.160294000 | 6                                                  | 2.556098000  | -0.812234000 | -0.457700000 |



|   |             |              |              |   |             |              |              |
|---|-------------|--------------|--------------|---|-------------|--------------|--------------|
| 6 | 3.462995000 | 1.096440000  | 0.591782000  | 6 | 2.480654000 | 1.690862000  | -0.006028000 |
| 8 | 4.439624000 | 0.542167000  | 1.047355000  | 8 | 3.354968000 | 1.800310000  | 0.823733000  |
| 8 | 3.318822000 | 2.428385000  | 0.521052000  | 8 | 1.769005000 | 2.735445000  | -0.485548000 |
| 6 | 4.413637000 | 3.228999000  | 1.028746000  | 6 | 2.081279000 | 4.047703000  | 0.040356000  |
| 1 | 4.569625000 | 3.018327000  | 2.086188000  | 1 | 1.909176000 | 4.066548000  | 1.115863000  |
| 1 | 5.322304000 | 3.015913000  | 0.466799000  | 1 | 3.119105000 | 4.297042000  | -0.177637000 |
| 1 | 4.104783000 | 4.260407000  | 0.883712000  | 1 | 1.406288000 | 4.729652000  | -0.469104000 |
| 6 | 2.398278000 | -2.198028000 | -0.103949000 | 6 | 3.681184000 | -1.143796000 | 0.372567000  |
| 8 | 2.992266000 | -2.781027000 | -1.003508000 | 8 | 4.841789000 | -1.206374000 | -0.017338000 |
| 8 | 2.028257000 | -2.806153000 | 1.052172000  | 8 | 3.310770000 | -1.517455000 | 1.625609000  |
| 6 | 2.375166000 | -4.200684000 | 1.180071000  | 6 | 4.361329000 | -1.987673000 | 2.493261000  |
| 1 | 1.905747000 | -4.787083000 | 0.389440000  | 1 | 4.844241000 | -2.869912000 | 2.070817000  |
| 1 | 3.456814000 | -4.333807000 | 1.142641000  | 1 | 5.105475000 | -1.207291000 | 2.657027000  |
| 1 | 1.991900000 | -4.502659000 | 2.151973000  | 1 | 3.869916000 | -2.240504000 | 3.430202000  |

  

| TS7                                            |              |              |              | 59                                       |              |              |              |
|------------------------------------------------|--------------|--------------|--------------|------------------------------------------|--------------|--------------|--------------|
| $V_{im.} = -1760.2\text{cm}^{-1}(-1101.09278)$ |              |              |              | $V_{im.} = 0\text{cm}^{-1}(-1101.19391)$ |              |              |              |
| 7                                              | 1.532893000  | 0.048422000  | 0.867942000  | 7                                        | 1.387294000  | 0.024973000  | 0.908534000  |
| 6                                              | 0.354908000  | -0.461169000 | 0.624021000  | 6                                        | 0.402784000  | -0.830579000 | 0.758722000  |
| 6                                              | 2.419958000  | -0.634950000 | 0.049344000  | 6                                        | 2.486070000  | -0.536681000 | 0.284218000  |
| 6                                              | 1.727517000  | -1.568185000 | -0.688885000 | 6                                        | 2.132099000  | -1.759283000 | -0.250869000 |
| 7                                              | 0.406451000  | -1.455626000 | -0.312945000 | 7                                        | 0.811425000  | -1.943610000 | 0.064162000  |
| 1                                              | 2.020496000  | -2.297499000 | -1.423918000 | 1                                        | 2.669363000  | -2.501402000 | -0.815691000 |
| 7                                              | -0.602144000 | -2.299906000 | -0.803515000 | 7                                        | 0.069705000  | -3.077605000 | -0.303290000 |
| 1                                              | -1.342197000 | -1.741244000 | -1.217517000 | 1                                        | -0.720730000 | -2.766421000 | -0.866643000 |
| 1                                              | -0.990372000 | -2.843801000 | -0.037988000 | 1                                        | -0.287061000 | -3.518406000 | 0.540485000  |
| 7                                              | -0.839187000 | -0.065305000 | 1.293659000  | 7                                        | -0.893192000 | -0.709642000 | 1.279534000  |
| 1                                              | -0.572285000 | 0.585039000  | 2.035474000  | 1                                        | -0.989002000 | -0.793767000 | 2.283983000  |
| 1                                              | -1.745360000 | -0.877699000 | 1.678304000  | 1                                        | -3.289815000 | -0.157215000 | 2.252191000  |
| 6                                              | 3.858211000  | -0.333360000 | 0.045577000  | 6                                        | 3.788121000  | 0.145149000  | 0.244621000  |
| 6                                              | 4.396997000  | 0.568047000  | 0.976259000  | 6                                        | 3.950275000  | 1.402089000  | 0.847473000  |
| 6                                              | 4.725341000  | -0.935429000 | -0.881007000 | 6                                        | 4.896896000  | -0.437305000 | -0.391506000 |
| 6                                              | 5.760278000  | 0.855560000  | 0.981654000  | 6                                        | 5.180849000  | 2.054521000  | 0.815182000  |
| 6                                              | 6.087194000  | -0.648203000 | -0.872155000 | 6                                        | 6.125298000  | 0.216670000  | -0.423016000 |
| 6                                              | 6.613039000  | 0.249251000  | 0.059262000  | 6                                        | 6.275100000  | 1.466833000  | 0.180217000  |
| 1                                              | 3.738848000  | 1.039770000  | 1.695157000  | 1                                        | 3.103246000  | 1.862018000  | 1.340870000  |
| 1                                              | 4.336415000  | -1.628797000 | -1.618120000 | 1                                        | 4.803912000  | -1.407794000 | -0.865725000 |
| 1                                              | 6.156946000  | 1.554655000  | 1.709638000  | 1                                        | 5.284400000  | 3.025352000  | 1.287336000  |
| 1                                              | 6.739066000  | -1.123403000 | -1.596717000 | 1                                        | 6.967974000  | -0.251300000 | -0.919758000 |
| 1                                              | 7.673604000  | 0.473402000  | 0.063878000  | 1                                        | 7.232281000  | 1.975057000  | 0.155064000  |
| 6                                              | -2.065033000 | 0.384271000  | 0.544612000  | 6                                        | -1.986866000 | -0.245525000 | 0.592457000  |
| 6                                              | -3.017053000 | -0.456281000 | 0.955307000  | 6                                        | -3.182993000 | -0.013189000 | 1.184078000  |
| 6                                              | -2.082806000 | 1.569943000  | -0.336232000 | 6                                        | -1.771691000 | -0.075060000 | -0.901145000 |
| 8                                              | -3.064324000 | 1.925732000  | -0.954128000 | 8                                        | -1.729647000 | -1.013650000 | -1.666733000 |
| 8                                              | -0.900973000 | 2.199417000  | -0.357419000 | 8                                        | -1.566904000 | 1.191963000  | -1.223172000 |
| 6                                              | -0.810249000 | 3.386033000  | -1.181731000 | 6                                        | -1.357956000 | 1.481925000  | -2.630008000 |
| 1                                              | -1.015550000 | 3.135159000  | -2.222128000 | 1                                        | -0.490260000 | 0.936266000  | -2.998409000 |
| 1                                              | -1.517787000 | 4.137946000  | -0.833155000 | 1                                        | -2.246923000 | 1.204776000  | -3.195464000 |
| 1                                              | 0.211280000  | 3.737293000  | -1.066003000 | 1                                        | -1.189203000 | 2.553748000  | -2.676493000 |
| 6                                              | -4.442171000 | -0.427999000 | 0.656229000  | 6                                        | -4.362768000 | 0.396763000  | 0.438470000  |
| 8                                              | -5.273289000 | 0.124570000  | 1.356399000  | 8                                        | -4.449841000 | 0.518906000  | -0.773766000 |
| 8                                              | -4.752202000 | -1.168972000 | -0.425482000 | 8                                        | -5.404445000 | 0.628659000  | 1.270958000  |
| 6                                              | -6.156176000 | -1.284593000 | -0.750688000 | 6                                        | -6.643680000 | 1.031006000  | 0.654388000  |
| 1                                              | -6.700593000 | -1.742229000 | 0.075557000  | 1                                        | -6.515345000 | 1.971801000  | 0.118043000  |
| 1                                              | -6.577059000 | -0.303721000 | -0.972115000 | 1                                        | -6.994891000 | 0.261966000  | -0.034425000 |
| 1                                              | -6.194955000 | -1.921561000 | -1.630710000 | 1                                        | -7.347104000 | 1.155486000  | 1.474065000  |

**Table S15. Optimized geometries of stationary points of the Scheme 12. PCM/B3LYP/6-311++G(d,p) calculations (Methanol, 64.7 °C). Coordinates in Angstroms. Sum of electronic and thermal Free Energies in a.u. are in parentheses.**

| TS8                                           |              |              |              | 60                                       |              |              |              |
|-----------------------------------------------|--------------|--------------|--------------|------------------------------------------|--------------|--------------|--------------|
| $V_{im.} = -201.9\text{cm}^{-1}(-1101.10937)$ |              |              |              | $V_{im.} = 0\text{cm}^{-1}(-1101.11532)$ |              |              |              |
| 7                                             | 2.410478000  | -1.484710000 | -0.685771000 | 7                                        | 2.264143000  | -1.698926000 | -0.310565000 |
| 6                                             | 1.206983000  | -1.879664000 | -1.022181000 | 6                                        | 1.046501000  | -2.056407000 | -0.616379000 |
| 6                                             | 2.329682000  | -0.112533000 | -0.463202000 | 6                                        | 2.286044000  | -0.302693000 | -0.313145000 |
| 6                                             | 1.039821000  | 0.318708000  | -0.657581000 | 6                                        | 1.043086000  | 0.190027000  | -0.615372000 |
| 7                                             | 0.339876000  | -0.816272000 | -1.036158000 | 7                                        | 0.254604000  | -0.942945000 | -0.791742000 |
| 1                                             | 0.555077000  | 1.274948000  | -0.565941000 | 1                                        | 0.629022000  | 1.180666000  | -0.680136000 |
| 7                                             | -1.018501000 | -0.868594000 | -1.379402000 | 7                                        | -1.040128000 | -0.967986000 | -1.380256000 |
| 1                                             | -1.202722000 | -1.797277000 | -1.767728000 | 1                                        | -1.242277000 | -1.961782000 | -1.564383000 |

|   |              |              |              |   |              |              |              |
|---|--------------|--------------|--------------|---|--------------|--------------|--------------|
| 1 | -1.219625000 | -0.176419000 | -2.105120000 | 1 | -1.017179000 | -0.472829000 | -2.282062000 |
| 7 | 0.785711000  | -3.139297000 | -1.420729000 | 7 | 0.526237000  | -3.318560000 | -0.844618000 |
| 1 | 1.568881000  | -3.767959000 | -1.550982000 | 1 | 1.252390000  | -4.021806000 | -0.904707000 |
| 1 | 0.101623000  | -3.561311000 | -0.800972000 | 1 | -0.185527000 | -3.598727000 | -0.177425000 |
| 6 | 3.506981000  | 0.670264000  | -0.064332000 | 6 | 3.513871000  | 0.441078000  | 0.001953000  |
| 6 | 4.749663000  | 0.041223000  | 0.108326000  | 6 | 4.706571000  | -0.246873000 | 0.270872000  |
| 6 | 3.424703000  | 2.056085000  | 0.153116000  | 6 | 3.528023000  | 1.845298000  | 0.035927000  |
| 6 | 5.872775000  | 0.774043000  | 0.486903000  | 6 | 5.878346000  | 0.448709000  | 0.562368000  |
| 6 | 4.547319000  | 2.785388000  | 0.532514000  | 6 | 4.699171000  | 2.537240000  | 0.328051000  |
| 6 | 5.778850000  | 2.148837000  | 0.701794000  | 6 | 5.881599000  | 1.842810000  | 0.592704000  |
| 1 | 4.825599000  | -1.026131000 | -0.056330000 | 1 | 4.706827000  | -1.329217000 | 0.249217000  |
| 1 | 2.479406000  | 2.571388000  | 0.025993000  | 1 | 2.621257000  | 2.404298000  | -0.165215000 |
| 1 | 6.823574000  | 0.268369000  | 0.614921000  | 1 | 6.790329000  | -0.101109000 | 0.766966000  |
| 1 | 4.461224000  | 3.853917000  | 0.695690000  | 1 | 4.689187000  | 3.621203000  | 0.349697000  |
| 1 | 6.652543000  | 2.718526000  | 0.997105000  | 1 | 6.793042000  | 2.383559000  | 0.820542000  |
| 6 | -3.117564000 | 0.490569000  | -0.589082000 | 6 | -2.579252000 | 0.859358000  | -1.116287000 |
| 6 | -2.357666000 | -0.410756000 | -0.151106000 | 6 | -2.146697000 | -0.275095000 | -0.593442000 |
| 6 | -4.276129000 | 1.286961000  | -0.445484000 | 6 | -3.661928000 | 1.640298000  | -0.588271000 |
| 8 | -5.400985000 | 0.956637000  | -0.802054000 | 8 | -4.834708000 | 1.527229000  | -0.928923000 |
| 8 | -3.996985000 | 2.499814000  | 0.097498000  | 8 | -3.234011000 | 2.626788000  | 0.243712000  |
| 6 | -5.110761000 | 3.404686000  | 0.246977000  | 6 | -4.237980000 | 3.542244000  | 0.724636000  |
| 1 | -5.559725000 | 3.624234000  | -0.722273000 | 1 | -4.715926000 | 4.061937000  | -0.106882000 |
| 1 | -5.863481000 | 2.982086000  | 0.913220000  | 1 | -4.993608000 | 3.015449000  | 1.308701000  |
| 1 | -4.688537000 | 4.308062000  | 0.680807000  | 1 | -3.704164000 | 4.251039000  | 1.353865000  |
| 6 | -2.197855000 | -1.282391000 | 1.022833000  | 6 | -2.589300000 | -1.020971000 | 0.606457000  |
| 8 | -2.813034000 | -1.086190000 | 2.048209000  | 8 | -3.393618000 | -0.599115000 | 1.405840000  |
| 8 | -1.348385000 | -2.305757000 | 0.845255000  | 8 | -2.016067000 | -2.242923000 | 0.699177000  |
| 6 | -1.179258000 | -3.191150000 | 1.982251000  | 6 | -2.419627000 | -3.054315000 | 1.832071000  |
| 1 | -0.823133000 | -2.626898000 | 2.842930000  | 1 | -2.157361000 | -2.550128000 | 2.761195000  |
| 1 | -2.125106000 | -3.677295000 | 2.217932000  | 1 | -3.492687000 | -3.236571000 | 1.794410000  |
| 1 | -0.438693000 | -3.923793000 | 1.673423000  | 1 | -1.870639000 | -3.987157000 | 1.735174000  |

  

| TS9                                               |              |              |              | 61                                          |              |              |              |
|---------------------------------------------------|--------------|--------------|--------------|---------------------------------------------|--------------|--------------|--------------|
| $V_{im.} = -1702.5 \text{ cm}^{-1} (-1101.09939)$ |              |              |              | $V_{im.} = 0 \text{ cm}^{-1} (-1101.19769)$ |              |              |              |
| 7                                                 | -2.283631000 | 1.599393000  | -0.479420000 | 7                                           | 2.239846000  | -1.502352000 | -0.655825000 |
| 6                                                 | -1.047448000 | 1.894414000  | -0.793327000 | 6                                           | 0.984499000  | -1.674342000 | -0.988698000 |
| 6                                                 | -2.339347000 | 0.210571000  | -0.354787000 | 6                                           | 2.415721000  | -0.126292000 | -0.478946000 |
| 6                                                 | -1.104378000 | -0.333682000 | -0.595604000 | 6                                           | 1.239533000  | 0.532382000  | -0.705314000 |
| 7                                                 | -0.282056000 | 0.754472000  | -0.870070000 | 7                                           | 0.310864000  | -0.471869000 | -1.010745000 |
| 1                                                 | -0.720817000 | -1.338615000 | -0.579102000 | 1                                           | 0.942144000  | 1.565535000  | -0.663034000 |
| 7                                                 | 1.032087000  | 0.681414000  | -1.367530000 | 7                                           | -0.980522000 | -0.305663000 | -1.471345000 |
| 1                                                 | 1.197999000  | 1.519489000  | -1.933621000 | 1                                           | -1.046156000 | 0.034080000  | -2.424907000 |
| 1                                                 | 1.478121000  | -0.387788000 | -1.876558000 | 1                                           | -3.225927000 | 0.957355000  | -2.042692000 |
| 7                                                 | -0.511950000 | 3.124872000  | -1.122909000 | 7                                           | 0.380286000  | -2.850484000 | -1.355899000 |
| 1                                                 | -1.210224000 | 3.857500000  | -1.111463000 | 1                                           | 0.886177000  | -3.673048000 | -1.057127000 |
| 1                                                 | 0.298984000  | 3.383088000  | -0.570085000 | 1                                           | -0.612053000 | -2.907952000 | -1.167584000 |
| 6                                                 | -3.589122000 | -0.475228000 | 0.001226000  | 6                                           | 3.720361000  | 0.429734000  | -0.094273000 |
| 6                                                 | -4.776746000 | 0.255426000  | 0.159436000  | 6                                           | 4.828533000  | -0.414970000 | 0.073117000  |
| 6                                                 | -3.632421000 | -1.867399000 | 0.187362000  | 6                                           | 3.896938000  | 1.808869000  | 0.111728000  |
| 6                                                 | -5.969159000 | -0.385508000 | 0.490269000  | 6                                           | 6.072239000  | 0.102201000  | 0.431547000  |
| 6                                                 | -4.824196000 | -2.505055000 | 0.517517000  | 6                                           | 5.139256000  | 2.322916000  | 0.469384000  |
| 6                                                 | -6.000527000 | -1.767904000 | 0.671086000  | 6                                           | 6.235630000  | 1.472512000  | 0.631518000  |
| 1                                                 | -4.755870000 | 1.328749000  | 0.019743000  | 1                                           | 4.704459000  | -1.479258000 | -0.081307000 |
| 1                                                 | -2.730951000 | -2.459310000 | 0.076336000  | 1                                           | 3.059464000  | 2.487163000  | -0.006607000 |
| 1                                                 | -6.875779000 | 0.197992000  | 0.607274000  | 1                                           | 6.915446000  | -0.568629000 | 0.555074000  |
| 1                                                 | -4.835000000 | -3.580348000 | 0.656841000  | 1                                           | 5.252643000  | 3.390349000  | 0.623183000  |
| 1                                                 | -6.928007000 | -2.266139000 | 0.929251000  | 1                                           | 7.202864000  | 1.874633000  | 0.910690000  |
| 6                                                 | 2.633928000  | -0.804671000 | -0.968760000 | 6                                           | -3.135190000 | 0.626245000  | -1.015413000 |
| 6                                                 | 2.148942000  | 0.320250000  | -0.438153000 | 6                                           | -1.999191000 | 0.027749000  | -0.599546000 |
| 6                                                 | 3.820548000  | -1.552761000 | -0.575738000 | 6                                           | -4.290002000 | 0.817337000  | -0.142793000 |
| 8                                                 | 4.925912000  | -1.371776000 | -1.056590000 | 8                                           | -4.404273000 | 0.415212000  | 1.002732000  |
| 8                                                 | 3.538462000  | -2.532507000 | 0.302815000  | 8                                           | -5.258404000 | 1.514245000  | -0.776035000 |
| 6                                                 | 4.634601000  | -3.394717000 | 0.685348000  | 6                                           | -6.462995000 | 1.771262000  | -0.025409000 |
| 1                                                 | 5.038717000  | -3.904627000 | -0.189353000 | 1                                           | -6.932858000 | 0.833603000  | 0.272753000  |
| 1                                                 | 5.420127000  | -2.816816000 | 1.172312000  | 1                                           | -6.239608000 | 2.367628000  | 0.859664000  |
| 1                                                 | 4.205283000  | -4.112466000 | 1.379638000  | 1                                           | -7.111626000 | 2.323195000  | -0.701024000 |
| 6                                                 | 2.553695000  | 1.151913000  | 0.710695000  | 6                                           | -1.746239000 | -0.375139000 | 0.842958000  |
| 8                                                 | 3.433398000  | 0.839405000  | 1.482350000  | 8                                           | -1.372639000 | 0.395073000  | 1.691965000  |
| 8                                                 | 1.843819000  | 2.291611000  | 0.796307000  | 8                                           | -1.926954000 | -1.684510000 | 1.002883000  |
| 2                                                 | 2.172450000  | 3.168852000  | 1.904983000  | 6                                           | -1.699134000 | -2.213463000 | 2.335847000  |
| 1                                                 | 2.023058000  | 2.645397000  | 2.848325000  | 1                                           | -0.669647000 | -2.026712000 | 2.638966000  |
| 1                                                 | 3.205967000  | 3.502338000  | 1.820451000  | 1                                           | -2.389141000 | -1.748099000 | 3.038652000  |
| 1                                                 | 1.489597000  | 4.009627000  | 1.821132000  | 1                                           | -1.891093000 | -3.279443000 | 2.255395000  |

**Table S16. Optimized geometries of stationary points of the Scheme 13. PCM/B3LYP/6-311++G(d,p) calculations (Methanol, 64.7 °C). Coordinates in Angstroms. Sum of electronic and thermal Free Energies in a.u. are in parentheses.**

| TS10                                                     |              |              |              | 62                                 |              |              |              |
|----------------------------------------------------------|--------------|--------------|--------------|------------------------------------|--------------|--------------|--------------|
| V <sub>im.</sub> = -362.1 cm <sup>-1</sup> (-1216.84814) |              |              |              | V <sub>im.</sub> = 0 (-1216.87323) |              |              |              |
| 7                                                        | 1.856643000  | 1.947339000  | -0.718550000 | 7                                  | -2.747769000 | -1.074427000 | 0.311310000  |
| 6                                                        | 2.799056000  | 1.027703000  | -0.961235000 | 6                                  | -2.159747000 | -2.318307000 | 0.310984000  |
| 6                                                        | 0.676487000  | 1.283048000  | -0.720651000 | 6                                  | -1.786257000 | -0.199542000 | 0.459494000  |
| 6                                                        | 0.874375000  | -0.123692000 | -0.867653000 | 6                                  | -0.424048000 | -0.850250000 | 0.611713000  |
| 7                                                        | 2.265834000  | -0.213447000 | -1.111559000 | 7                                  | -0.839509000 | -2.262729000 | 0.477665000  |
| 1                                                        | 0.238792000  | -0.804603000 | -1.421025000 | 1                                  | -0.077371000 | -0.694121000 | 1.639231000  |
| 7                                                        | 2.922245000  | -1.412341000 | -1.399825000 | 7                                  | 0.052589000  | -3.322576000 | 0.594225000  |
| 1                                                        | 3.663099000  | -1.590788000 | -0.727907000 | 1                                  | 0.093880000  | -3.863741000 | -0.263954000 |
| 1                                                        | 3.304383000  | -1.388522000 | -2.340755000 | 1                                  | -0.180504000 | -3.911278000 | 1.388385000  |
| 7                                                        | 4.121412000  | 1.282673000  | -1.003138000 | 7                                  | -2.874051000 | -3.420938000 | 0.170609000  |
| 1                                                        | 4.394134000  | 2.253166000  | -1.043696000 | 1                                  | -3.873982000 | -3.345538000 | 0.060183000  |
| 1                                                        | 4.743694000  | 0.626514000  | -1.450687000 | 1                                  | -2.452602000 | -4.337458000 | 0.169584000  |
| 6                                                        | -0.600529000 | 1.972143000  | -0.580684000 | 6                                  | -2.044715000 | 1.232773000  | 0.518013000  |
| 6                                                        | -0.646118000 | 3.281120000  | -0.067603000 | 6                                  | -3.319592000 | 1.721806000  | 0.174992000  |
| 6                                                        | -1.800916000 | 1.353019000  | -0.969419000 | 6                                  | -1.048340000 | 2.136054000  | 0.927037000  |
| 6                                                        | -1.859659000 | 3.944647000  | 0.062706000  | 6                                  | -3.586014000 | 3.082143000  | 0.236133000  |
| 6                                                        | -3.013956000 | 2.024564000  | -0.840535000 | 6                                  | -1.324984000 | 3.497580000  | 0.993374000  |
| 6                                                        | -3.048602000 | 3.318636000  | -0.322513000 | 6                                  | -2.589708000 | 3.972635000  | 0.646437000  |
| 1                                                        | 0.276668000  | 3.761966000  | 0.231553000  | 1                                  | -4.084956000 | 1.025622000  | -0.142813000 |
| 1                                                        | -1.784029000 | 0.359952000  | -1.401322000 | 1                                  | -0.063945000 | 1.776635000  | 1.196757000  |
| 1                                                        | -1.882642000 | 4.950828000  | 0.465605000  | 1                                  | -4.567361000 | 3.452824000  | -0.035202000 |
| 1                                                        | -3.931655000 | 1.539211000  | -1.151965000 | 1                                  | -0.554259000 | 4.187443000  | 1.315479000  |
| 1                                                        | -3.993907000 | 3.840075000  | -0.224098000 | 1                                  | -2.800776000 | 5.034735000  | 0.695389000  |
| 6                                                        | -0.798784000 | -1.284734000 | 1.133569000  | 6                                  | 1.894009000  | -0.059312000 | 0.259397000  |
| 6                                                        | 0.385348000  | -0.934009000 | 0.907629000  | 6                                  | 0.729465000  | -0.428557000 | -0.300160000 |
| 6                                                        | -2.159377000 | -1.576259000 | 0.964369000  | 6                                  | 3.083226000  | 0.313857000  | -0.456807000 |
| 8                                                        | -2.598033000 | -2.468916000 | 0.225539000  | 8                                  | 4.018770000  | -0.439820000 | -0.717886000 |
| 8                                                        | -2.972858000 | -0.816907000 | 1.736035000  | 8                                  | 3.165534000  | 1.660839000  | -0.671914000 |
| 6                                                        | -4.388268000 | -1.065706000 | 1.616638000  | 6                                  | 4.397406000  | 2.148077000  | -1.232444000 |
| 1                                                        | -4.722812000 | -0.904112000 | 0.591410000  | 1                                  | 5.241430000  | 1.910714000  | -0.582655000 |
| 1                                                        | -4.625513000 | -2.085010000 | 1.923248000  | 1                                  | 4.570961000  | 1.721075000  | -2.221516000 |
| 1                                                        | -4.860912000 | -0.350396000 | 2.285526000  | 1                                  | 4.276032000  | 3.226966000  | -1.308120000 |
| 6                                                        | 1.636945000  | -1.060610000 | 1.688437000  | 6                                  | 0.508570000  | -0.454431000 | -1.773263000 |
| 8                                                        | 2.091374000  | -2.113499000 | 2.081520000  | 8                                  | 1.340420000  | -0.188333000 | -2.618530000 |
| 8                                                        | 2.195926000  | 0.131940000  | 1.928670000  | 8                                  | -0.757627000 | -0.809930000 | -2.094854000 |
| 6                                                        | 3.406338000  | 0.131826000  | 2.723355000  | 6                                  | -1.090372000 | -0.843466000 | -3.498006000 |
| 1                                                        | 3.201101000  | -0.266330000 | 3.716863000  | 1                                  | -0.951434000 | 0.141509000  | -3.944239000 |
| 1                                                        | 4.177117000  | -0.465123000 | 2.236397000  | 1                                  | -0.467744000 | -1.572509000 | -4.017325000 |
| 1                                                        | 3.709033000  | 1.173570000  | 2.783881000  | 1                                  | -2.136442000 | -1.136806000 | -3.542367000 |
| 1                                                        | -1.731423000 | -2.498097000 | -1.413290000 | 1                                  | 2.016107000  | -0.078078000 | 2.152285000  |
| 8                                                        | -1.263172000 | -2.298020000 | -2.245161000 | 8                                  | 1.959685000  | -0.115590000 | 3.151111000  |
| 6                                                        | -0.792722000 | -3.517987000 | -2.815715000 | 6                                  | 2.774856000  | -1.185757000 | 3.610718000  |
| 1                                                        | -1.618841000 | -4.195621000 | -3.059983000 | 1                                  | 3.833586000  | -1.031653000 | 3.365083000  |
| 1                                                        | -0.266410000 | -3.268266000 | -3.738203000 | 1                                  | 2.681991000  | -1.239706000 | 4.697744000  |
| 1                                                        | -0.096430000 | -4.037022000 | -2.147038000 | 1                                  | 2.461787000  | -2.151084000 | 3.192319000  |

  

| TS11                                                      |              |              |              | 63                                                  |              |              |              |
|-----------------------------------------------------------|--------------|--------------|--------------|-----------------------------------------------------|--------------|--------------|--------------|
| V <sub>im.</sub> = -1083.8 cm <sup>-1</sup> (-1216.86763) |              |              |              | V <sub>im.</sub> = 0 cm <sup>-1</sup> (-1101.19909) |              |              |              |
| 7                                                         | -2.806607000 | -0.839402000 | 0.248461000  | 7                                                   | 2.125459000  | -2.208112000 | -0.111096000 |
| 6                                                         | -2.333618000 | -2.120519000 | 0.412989000  | 6                                                   | 1.146361000  | -3.081825000 | 0.038982000  |
| 6                                                         | -1.781522000 | -0.036765000 | 0.390034000  | 6                                                   | 1.524104000  | -0.970686000 | -0.185246000 |
| 6                                                         | -0.503524000 | -0.776670000 | 0.703567000  | 6                                                   | 0.143468000  | -1.084201000 | -0.070217000 |
| 7                                                         | -1.027378000 | -2.154135000 | 0.677801000  | 7                                                   | -0.078162000 | -2.479383000 | 0.041089000  |
| 1                                                         | -0.181845000 | -0.528231000 | 1.731646000  | 1                                                   | -2.385019000 | -1.267218000 | -1.002472000 |
| 7                                                         | -0.234767000 | -3.263000000 | 0.951868000  | 7                                                   | -1.286817000 | -3.083845000 | 0.393698000  |
| 1                                                         | -0.203177000 | -3.896922000 | 0.159204000  | 1                                                   | -1.171025000 | -3.608540000 | 1.256290000  |
| 1                                                         | -0.549538000 | -3.740589000 | 1.791190000  | 1                                                   | -1.603211000 | -3.702296000 | -0.347180000 |
| 7                                                         | -3.131210000 | -3.170953000 | 0.325817000  | 7                                                   | 1.304457000  | -4.421915000 | 0.270347000  |
| 1                                                         | -4.110240000 | -3.025695000 | 0.130800000  | 1                                                   | 2.236398000  | -4.760947000 | 0.075598000  |
| 1                                                         | -2.794518000 | -4.114848000 | 0.441263000  | 1                                                   | 0.578429000  | -5.038307000 | -0.069233000 |
| 6                                                         | -1.904945000 | 1.411176000  | 0.295254000  | 6                                                   | 2.355472000  | 0.220300000  | -0.433616000 |
| 6                                                         | -3.033534000 | 1.973507000  | -0.329375000 | 6                                                   | 3.563874000  | 0.379313000  | 0.264904000  |
| 6                                                         | -0.920229000 | 2.256595000  | 0.835656000  | 6                                                   | 2.005131000  | 1.175326000  | -1.397817000 |
| 6                                                         | -3.166267000 | 3.352193000  | -0.419764000 | 6                                                   | 4.386041000  | 1.474751000  | 0.019275000  |

|                                                                 |              |              |              |   |              |              |              |
|-----------------------------------------------------------------|--------------|--------------|--------------|---|--------------|--------------|--------------|
| 6                                                               | -1.067028000 | 3.637364000  | 0.751257000  | 6 | 2.831474000  | 2.270421000  | -1.644883000 |
| 6                                                               | -2.183806000 | 4.186404000  | 0.120842000  | 6 | 4.022166000  | 2.425679000  | -0.936824000 |
| 1                                                               | -3.788119000 | 1.319721000  | -0.747710000 | 1 | 3.849143000  | -0.360372000 | 1.003406000  |
| 1                                                               | -0.060202000 | 1.838979000  | 1.343596000  | 1 | 1.093093000  | 1.052560000  | -1.968850000 |
| 1                                                               | -4.032162000 | 3.780237000  | -0.910774000 | 1 | 5.311584000  | 1.587515000  | 0.572818000  |
| 1                                                               | -0.311109000 | 4.285013000  | 1.178993000  | 1 | 2.547772000  | 2.996773000  | -2.398164000 |
| 1                                                               | -2.291021000 | 5.262845000  | 0.051573000  | 1 | 4.664975000  | 3.276896000  | -1.130889000 |
| 6                                                               | 1.857103000  | -0.152581000 | 0.421556000  | 6 | -2.174019000 | -0.349882000 | -0.474134000 |
| 6                                                               | 0.723570000  | -0.549131000 | -0.177536000 | 6 | -0.919105000 | -0.105245000 | -0.024803000 |
| 6                                                               | 3.138425000  | 0.070376000  | -0.248713000 | 6 | -3.330071000 | 0.528603000  | -0.253963000 |
| 8                                                               | 4.035639000  | -0.754431000 | -0.309141000 | 8 | -3.414394000 | 1.435395000  | 0.553864000  |
| 8                                                               | 3.284951000  | 1.349565000  | -0.658141000 | 8 | -4.350135000 | 0.174221000  | -1.067933000 |
| 6                                                               | 4.565936000  | 1.705167000  | -1.220331000 | 6 | -5.569239000 | 0.933755000  | -0.940300000 |
| 1                                                               | 5.362206000  | 1.537578000  | -0.494397000 | 1 | -5.966401000 | 0.846741000  | 0.071588000  |
| 1                                                               | 4.761817000  | 1.122477000  | -2.121083000 | 1 | -5.390249000 | 1.983588000  | -1.174476000 |
| 1                                                               | 4.491255000  | 2.762496000  | -1.463217000 | 1 | -6.258953000 | 0.497041000  | -1.658263000 |
| 6                                                               | 0.628231000  | -0.770389000 | -1.647942000 | 6 | -0.590926000 | 1.236763000  | 0.601806000  |
| 8                                                               | 1.556516000  | -0.688671000 | -2.426791000 | 8 | -0.594943000 | 2.290653000  | 0.012086000  |
| 8                                                               | -0.627227000 | -1.069874000 | -2.035101000 | 8 | -0.273391000 | 1.093473000  | 1.893834000  |
| 6                                                               | -0.841975000 | -1.282651000 | -3.447468000 | 6 | 0.054697000  | 2.304345000  | 2.615839000  |
| 1                                                               | -0.582956000 | -0.384108000 | -4.007473000 | 1 | 0.924759000  | 2.783745000  | 2.167780000  |
| 1                                                               | -0.240524000 | -2.121738000 | -3.797390000 | 1 | -0.793754000 | 2.988363000  | 2.604556000  |
| 1                                                               | -1.901403000 | -1.503471000 | -3.549162000 | 1 | 0.274249000  | 1.982804000  | 3.630394000  |
| 1                                                               | 1.741335000  | 0.072887000  | 1.710788000  |   |              |              |              |
| 8                                                               | 1.381545000  | 0.259462000  | 2.933689000  |   |              |              |              |
| 6                                                               | 2.042197000  | -0.670195000 | 3.747334000  |   |              |              |              |
| 1                                                               | 2.679044000  | -0.183215000 | 4.505515000  |   |              |              |              |
| 1                                                               | 1.341944000  | -1.324488000 | 4.295224000  |   |              |              |              |
| 1                                                               | 2.703474000  | -1.338198000 | 3.163505000  |   |              |              |              |
| <b>TS12</b>                                                     |              |              |              |   |              |              |              |
| <b><math>v_{im.} = -418.5\text{cm}^{-1}(-1216.86865)</math></b> |              |              |              |   |              |              |              |
| 7                                                               | -0.493685000 | -2.418416000 | -0.320114000 |   |              |              |              |
| 6                                                               | 0.774726000  | -2.207797000 | -0.613796000 |   |              |              |              |
| 6                                                               | -1.070681000 | -1.172530000 | -0.133218000 |   |              |              |              |
| 6                                                               | -0.134754000 | -0.176880000 | -0.354875000 |   |              |              |              |
| 7                                                               | 1.050585000  | -0.872154000 | -0.638857000 |   |              |              |              |
| 1                                                               | 1.206265000  | 2.959548000  | -0.206056000 |   |              |              |              |
| 7                                                               | 2.281272000  | -0.249420000 | -0.920556000 |   |              |              |              |
| 1                                                               | 2.331992000  | -0.039370000 | -1.918588000 |   |              |              |              |
| 1                                                               | 3.466314000  | -0.942908000 | -0.356732000 |   |              |              |              |
| 7                                                               | 1.689440000  | -3.177279000 | -0.952719000 |   |              |              |              |
| 1                                                               | 2.644268000  | -3.011424000 | -0.661732000 |   |              |              |              |
| 1                                                               | 1.376922000  | -4.106220000 | -0.702060000 |   |              |              |              |
| 6                                                               | -2.468249000 | -1.072280000 | 0.312604000  |   |              |              |              |
| 6                                                               | -3.426485000 | -1.969840000 | -0.184227000 |   |              |              |              |
| 6                                                               | -2.870962000 | -0.121650000 | 1.262821000  |   |              |              |              |
| 6                                                               | -4.751309000 | -1.901568000 | 0.238712000  |   |              |              |              |
| 6                                                               | -4.197488000 | -0.052838000 | 1.683718000  |   |              |              |              |
| 6                                                               | -5.144120000 | -0.940359000 | 1.171806000  |   |              |              |              |
| 1                                                               | -3.124572000 | -2.716029000 | -0.909223000 |   |              |              |              |
| 1                                                               | -2.138963000 | 0.549342000  | 1.697715000  |   |              |              |              |
| 1                                                               | -5.479218000 | -2.598587000 | -0.161703000 |   |              |              |              |
| 1                                                               | -4.487867000 | 0.685613000  | 2.422678000  |   |              |              |              |
| 1                                                               | -6.175426000 | -0.888999000 | 1.502034000  |   |              |              |              |
| 6                                                               | 1.139805000  | 1.879026000  | -0.197762000 |   |              |              |              |
| 6                                                               | -0.058621000 | 1.266737000  | -0.303224000 |   |              |              |              |
| 6                                                               | 2.463253000  | 1.151378000  | -0.206184000 |   |              |              |              |
| 8                                                               | 3.469346000  | 1.750646000  | -0.668889000 |   |              |              |              |
| 8                                                               | 2.690929000  | 0.582834000  | 1.270355000  |   |              |              |              |
| 6                                                               | 2.914421000  | 1.609735000  | 2.241058000  |   |              |              |              |
| 1                                                               | 3.705445000  | 2.290150000  | 1.914087000  |   |              |              |              |
| 1                                                               | 1.994448000  | 2.173261000  | 2.418343000  |   |              |              |              |
| 1                                                               | 3.214899000  | 1.121431000  | 3.168717000  |   |              |              |              |
| 6                                                               | -1.260185000 | 2.144325000  | -0.487621000 |   |              |              |              |
| 8                                                               | -1.407619000 | 3.218677000  | 0.056209000  |   |              |              |              |
| 8                                                               | -2.125539000 | 1.631154000  | -1.369375000 |   |              |              |              |
| 6                                                               | -3.313982000 | 2.409076000  | -1.638123000 |   |              |              |              |
| 1                                                               | -3.888395000 | 2.544212000  | -0.721726000 |   |              |              |              |
| 1                                                               | -3.043060000 | 3.379857000  | -2.053001000 |   |              |              |              |
| 1                                                               | -3.879472000 | 1.828225000  | -2.361797000 |   |              |              |              |
| 8                                                               | 4.150941000  | -1.188162000 | 0.450581000  |   |              |              |              |
| 6                                                               | 5.562930000  | -0.989490000 | 0.137990000  |   |              |              |              |
| 1                                                               | 5.833863000  | -1.729547000 | -0.610711000 |   |              |              |              |

|   |             |              |              |
|---|-------------|--------------|--------------|
| 1 | 5.715784000 | 0.020937000  | -0.237911000 |
| 1 | 6.123576000 | -1.156925000 | 1.054294000  |
| 1 | 3.735657000 | -0.433144000 | 1.059965000  |

**Table S17. Optimized geometries of stationary points of the Scheme 14. PCM/B3LYP/6-311++G(d,p) calculations (Methanol, 64.7 °C). Coordinates in Angstroms. Sum of electronic and thermal Free Energies in a.u. are in parentheses.**

| TS13                                                     |              |              |              | 64                                 |              |              |              |
|----------------------------------------------------------|--------------|--------------|--------------|------------------------------------|--------------|--------------|--------------|
| V <sub>im.</sub> = -227.0 cm <sup>-1</sup> (-1216.85586) |              |              |              | V <sub>im.</sub> = 0 (-1216.87167) |              |              |              |
| 7                                                        | 0.098176000  | -0.749067000 | -0.433120000 | 7                                  | -0.182655000 | 1.032520000  | 0.066818000  |
| 6                                                        | -0.548220000 | -1.845688000 | -0.814302000 | 6                                  | 0.184586000  | 2.302102000  | 0.342482000  |
| 6                                                        | 1.410824000  | -0.851409000 | -0.911641000 | 6                                  | -1.529630000 | 1.032611000  | -0.367090000 |
| 6                                                        | 1.531618000  | -2.019776000 | -1.604669000 | 6                                  | -1.953573000 | 2.318635000  | -0.326128000 |
| 7                                                        | 0.290350000  | -2.644020000 | -1.542753000 | 7                                  | -0.888423000 | 3.097785000  | 0.114275000  |
| 1                                                        | 2.336435000  | -2.451164000 | -2.173628000 | 1                                  | -2.888483000 | 2.771458000  | -0.602882000 |
| 7                                                        | 0.006642000  | -3.870062000 | -2.149483000 | 7                                  | -0.945765000 | 4.489560000  | 0.196662000  |
| 1                                                        | -0.712693000 | -3.758045000 | -2.858463000 | 1                                  | -0.260664000 | 4.911357000  | -0.423955000 |
| 1                                                        | -0.292805000 | -4.547020000 | -1.453565000 | 1                                  | -0.800841000 | 4.796378000  | 1.153482000  |
| 7                                                        | -1.811798000 | -2.218783000 | -0.480264000 | 7                                  | 1.382790000  | 2.711526000  | 0.805079000  |
| 1                                                        | -2.494624000 | -1.491634000 | -0.248715000 | 1                                  | 2.207877000  | 2.314905000  | 0.335528000  |
| 1                                                        | -2.207148000 | -2.970703000 | -1.027171000 | 1                                  | 1.461925000  | 3.707858000  | 0.961145000  |
| 6                                                        | 2.435586000  | 0.180039000  | -0.705953000 | 6                                  | -2.268835000 | -0.163341000 | -0.792457000 |
| 6                                                        | 2.099700000  | 1.539612000  | -0.612698000 | 6                                  | -1.686733000 | -1.132854000 | -1.623540000 |
| 6                                                        | 3.791775000  | -0.180224000 | -0.627185000 | 6                                  | -3.608926000 | -0.316562000 | -0.404818000 |
| 6                                                        | 3.090007000  | 2.506273000  | -0.448368000 | 6                                  | -2.431231000 | -2.228942000 | -2.052746000 |
| 6                                                        | 4.779512000  | 0.788693000  | -0.473293000 | 6                                  | -4.351449000 | -1.409182000 | -0.844890000 |
| 6                                                        | 4.433580000  | 2.137828000  | -0.380147000 | 6                                  | -3.764293000 | -2.370979000 | -1.667159000 |
| 1                                                        | 1.063316000  | 1.842240000  | -0.680763000 | 1                                  | -0.658066000 | -1.024117000 | -1.941934000 |
| 1                                                        | 4.070693000  | -1.226980000 | -0.672298000 | 1                                  | -4.062941000 | 0.415964000  | 0.252312000  |
| 1                                                        | 2.809897000  | 3.551739000  | -0.380330000 | 1                                  | -1.969805000 | -2.969059000 | -2.696442000 |
| 1                                                        | 5.819829000  | 0.488670000  | -0.413247000 | 1                                  | -5.385194000 | -1.514228000 | -0.536051000 |
| 1                                                        | 5.202039000  | 2.891746000  | -0.252496000 | 1                                  | -4.340517000 | -3.225260000 | -2.003515000 |
| 6                                                        | -0.550641000 | 0.319725000  | 1.192663000  | 6                                  | 0.594579000  | -0.157828000 | 0.418716000  |
| 6                                                        | -1.230385000 | 1.339180000  | 0.965944000  | 6                                  | 1.726060000  | -0.448083000 | -0.222208000 |
| 6                                                        | -0.010073000 | -0.422911000 | 2.346839000  | 6                                  | 0.043683000  | -0.919008000 | 1.581152000  |
| 8                                                        | -0.139837000 | 0.007613000  | 3.475569000  | 8                                  | 0.406535000  | -2.033298000 | 1.898873000  |
| 8                                                        | 0.600919000  | -1.569932000 | 2.056882000  | 8                                  | -0.875494000 | -0.220205000 | 2.274918000  |
| 6                                                        | 1.125283000  | -2.312277000 | 3.182036000  | 6                                  | -1.437499000 | -0.869922000 | 3.435593000  |
| 1                                                        | 1.867370000  | -1.716396000 | 3.712968000  | 1                                  | -1.931731000 | -1.797757000 | 3.147315000  |
| 1                                                        | 0.317872000  | -2.588822000 | 3.859873000  | 1                                  | -0.655986000 | -1.080512000 | 4.165947000  |
| 1                                                        | 1.583079000  | -3.197907000 | 2.749765000  | 1                                  | -2.157684000 | -0.164081000 | 3.841583000  |
| 6                                                        | -1.927017000 | 2.250276000  | 0.145562000  | 6                                  | 2.574199000  | -1.563523000 | 0.119424000  |
| 8                                                        | -3.095224000 | 2.107671000  | -0.222151000 | 8                                  | 3.514022000  | -1.522496000 | 0.907153000  |
| 8                                                        | -1.192953000 | 3.332919000  | -0.175176000 | 8                                  | 2.333495000  | -2.651993000 | -0.663384000 |
| 6                                                        | -1.842193000 | 4.339340000  | -0.985323000 | 6                                  | 3.227009000  | -3.769314000 | -0.503233000 |
| 1                                                        | -2.136083000 | 3.921939000  | -1.948351000 | 1                                  | 4.254369000  | -3.478959000 | -0.728581000 |
| 1                                                        | -2.717625000 | 4.734413000  | -0.469980000 | 1                                  | 3.175507000  | -4.164724000 | 0.512261000  |
| 1                                                        | -1.096261000 | 5.118333000  | -1.120471000 | 1                                  | 2.884663000  | -4.518597000 | -1.214060000 |
| 8                                                        | -4.080273000 | -0.469969000 | 0.055836000  | 8                                  | 3.426261000  | 1.689624000  | -0.981328000 |
| 6                                                        | -5.226958000 | -0.704546000 | -0.763896000 | 6                                  | 3.374683000  | 2.268617000  | -2.284813000 |
| 1                                                        | -5.022728000 | -0.484129000 | -1.817525000 | 1                                  | 2.350211000  | 2.532819000  | -2.573206000 |
| 1                                                        | -5.487788000 | -1.759658000 | -0.671787000 | 1                                  | 3.976368000  | 3.178751000  | -2.269860000 |
| 1                                                        | -6.081287000 | -0.104047000 | -0.434369000 | 1                                  | 3.787945000  | 1.590753000  | -3.039627000 |
| 1                                                        | -3.820528000 | 0.469731000  | -0.021202000 | 1                                  | 2.857101000  | 0.869687000  | -0.958858000 |

  

| TS14                                                     |              |              |              |
|----------------------------------------------------------|--------------|--------------|--------------|
| V <sub>im.</sub> = -1149.9cm <sup>-1</sup> (-1216.86918) |              |              |              |
| 7                                                        | -0.256724000 | 1.040493000  | 0.088638000  |
| 6                                                        | -0.025687000 | 2.347733000  | 0.383425000  |
| 6                                                        | -1.622903000 | 0.886111000  | -0.261974000 |
| 6                                                        | -2.198707000 | 2.103553000  | -0.132775000 |
| 7                                                        | -1.211935000 | 2.997571000  | 0.272070000  |
| 1                                                        | -3.199339000 | 2.442704000  | -0.331587000 |
| 7                                                        | -1.434279000 | 4.369322000  | 0.395671000  |
| 1                                                        | -0.847131000 | 4.882288000  | -0.256189000 |
| 1                                                        | -1.257104000 | 4.672801000  | 1.348253000  |
| 7                                                        | 1.154477000  | 2.887274000  | 0.713661000  |
| 1                                                        | 1.965269000  | 2.612598000  | 0.072845000  |
| 1                                                        | 1.118861000  | 3.872610000  | 0.941665000  |
| 6                                                        | -2.224147000 | -0.372145000 | -0.721024000 |

|   |              |              |              |
|---|--------------|--------------|--------------|
| 6 | -1.558726000 | -1.213920000 | -1.625727000 |
| 6 | -3.515594000 | -0.718283000 | -0.294700000 |
| 6 | -2.173640000 | -2.374473000 | -2.089306000 |
| 6 | -4.129959000 | -1.873629000 | -0.770054000 |
| 6 | -3.460056000 | -2.707705000 | -1.665668000 |
| 1 | -0.568506000 | -0.954853000 | -1.978679000 |
| 1 | -4.030745000 | -0.086319000 | 0.419208000  |
| 1 | -1.648937000 | -3.013851000 | -2.789896000 |
| 1 | -5.127865000 | -2.127960000 | -0.431632000 |
| 1 | -3.936342000 | -3.610862000 | -2.029416000 |
| 6 | 0.644568000  | -0.058957000 | 0.386635000  |
| 6 | 1.862447000  | -0.126934000 | -0.154805000 |
| 6 | 0.154429000  | -1.018783000 | 1.427407000  |
| 8 | 0.621606000  | -2.125448000 | 1.595157000  |
| 8 | -0.817377000 | -0.498312000 | 2.191025000  |
| 6 | -1.327020000 | -1.339834000 | 3.250301000  |
| 1 | -1.742435000 | -2.257396000 | 2.834140000  |
| 1 | -0.530996000 | -1.579669000 | 3.955052000  |
| 1 | -2.102995000 | -0.753550000 | 3.735197000  |
| 6 | 2.837142000  | -1.165974000 | 0.192709000  |
| 8 | 3.646049000  | -1.076533000 | 1.100397000  |
| 8 | 2.848077000  | -2.167026000 | -0.711320000 |
| 6 | 3.855582000  | -3.185682000 | -0.533542000 |
| 1 | 4.853273000  | -2.747907000 | -0.577241000 |
| 1 | 3.718714000  | -3.693861000 | 0.421441000  |
| 1 | 3.710340000  | -3.881516000 | -1.356347000 |
| 8 | 2.926021000  | 2.032687000  | -1.071669000 |
| 6 | 2.581857000  | 2.390637000  | -2.392372000 |
| 1 | 1.896206000  | 3.251831000  | -2.421436000 |
| 1 | 3.473316000  | 2.660750000  | -2.974212000 |
| 1 | 2.084997000  | 1.560351000  | -2.920150000 |
| 1 | 2.418116000  | 0.935949000  | -0.771209000 |

**Table S18. Optimized geometries of stationary points of the Scheme 15. PCM/B3LYP/6-311++G(d,p) calculations (Methanol, 64.7 °C). Coordinates in Angstroms. Sum of electronic and thermal Free Energies in a.u. are in parentheses.**

| TS15                                                     |              |              |              | 65                                 |              |              |              |
|----------------------------------------------------------|--------------|--------------|--------------|------------------------------------|--------------|--------------|--------------|
| V <sub>im.</sub> = -219.9 cm <sup>-1</sup> (-1216.85047) |              |              |              | V <sub>im.</sub> = 0 (-1216.85502) |              |              |              |
| 7                                                        | 1.262607000  | -0.737020000 | 0.643969000  | 7                                  | -1.641198000 | -0.069440000 | -0.679723000 |
| 6                                                        | 0.192017000  | -0.892098000 | -0.094273000 | 6                                  | -0.486023000 | -0.613004000 | -0.420785000 |
| 6                                                        | 2.300251000  | -0.495040000 | -0.244737000 | 6                                  | -2.517147000 | -0.591736000 | 0.259617000  |
| 6                                                        | 1.810935000  | -0.509926000 | -1.532692000 | 6                                  | -1.835531000 | -1.470384000 | 1.073751000  |
| 7                                                        | 0.459902000  | -0.753101000 | -1.425345000 | 7                                  | -0.532053000 | -1.479410000 | 0.632187000  |
| 1                                                        | 2.265792000  | -0.379120000 | -2.499017000 | 1                                  | -2.127847000 | -2.088531000 | 1.904695000  |
| 7                                                        | -0.413071000 | -0.833787000 | -2.524466000 | 7                                  | 0.467010000  | -2.298181000 | 1.186537000  |
| 1                                                        | -1.052079000 | -0.043286000 | -2.479030000 | 1                                  | 1.180660000  | -1.703693000 | 1.601196000  |
| 1                                                        | -0.955866000 | -1.694403000 | -2.448057000 | 1                                  | 0.903988000  | -2.833215000 | 0.435182000  |
| 7                                                        | -1.105720000 | -1.124708000 | 0.398499000  | 7                                  | 0.713981000  | -0.361819000 | -1.193809000 |
| 1                                                        | -1.057343000 | -1.448108000 | 1.361910000  | 1                                  | 0.410463000  | 0.164081000  | -2.019738000 |
| 1                                                        | -1.624180000 | -1.822268000 | -0.158617000 | 1                                  | 1.136100000  | -1.273075000 | -1.507772000 |
| 6                                                        | 3.678045000  | -0.277720000 | 0.217119000  | 6                                  | -3.935857000 | -0.209041000 | 0.289299000  |
| 6                                                        | 4.006142000  | -0.436947000 | 1.572421000  | 6                                  | -4.464684000 | 0.633107000  | -0.700486000 |
| 6                                                        | 4.697143000  | 0.092016000  | -0.676597000 | 6                                  | -4.792908000 | -0.675372000 | 1.299339000  |
| 6                                                        | 5.310557000  | -0.235116000 | 2.018575000  | 6                                  | -5.809603000 | 0.996054000  | -0.681085000 |
| 6                                                        | 6.000082000  | 0.290265000  | -0.229035000 | 6                                  | -6.136577000 | -0.312646000 | 1.315378000  |
| 6                                                        | 6.315206000  | 0.127893000  | 1.121555000  | 6                                  | -6.652950000 | 0.525323000  | 0.325285000  |
| 1                                                        | 3.229572000  | -0.720903000 | 2.271517000  | 1                                  | -3.814067000 | 0.999491000  | -1.484635000 |
| 1                                                        | 4.473000000  | 0.232141000  | -1.728059000 | 1                                  | -4.411193000 | -1.322573000 | 2.080746000  |
| 1                                                        | 5.542429000  | -0.363589000 | 3.070210000  | 1                                  | -6.199342000 | 1.647728000  | -1.455262000 |
| 1                                                        | 6.771036000  | 0.575878000  | -0.936096000 | 1                                  | -6.781447000 | -0.683208000 | 2.104327000  |
| 1                                                        | 7.330042000  | 0.284482000  | 1.469007000  | 1                                  | -7.699320000 | 0.808014000  | 0.339755000  |
| 6                                                        | -2.146811000 | 0.450987000  | 0.412542000  | 6                                  | 1.840571000  | 0.405687000  | -0.486304000 |
| 6                                                        | -1.663734000 | 1.430913000  | -0.210273000 | 6                                  | 2.903702000  | -0.283549000 | -0.100273000 |
| 6                                                        | -3.345854000 | 0.112347000  | 1.198329000  | 6                                  | 1.613382000  | 1.872889000  | -0.436389000 |
| 8                                                        | -4.234330000 | 0.913230000  | 1.397132000  | 8                                  | 2.281267000  | 2.641217000  | 0.220553000  |
| 8                                                        | -3.353964000 | -1.144863000 | 1.666687000  | 8                                  | 0.607986000  | 2.254069000  | -1.245496000 |
| 6                                                        | -4.504865000 | -1.536532000 | 2.452295000  | 6                                  | 0.308716000  | 3.668244000  | -1.302792000 |
| 1                                                        | -4.582757000 | -0.908350000 | 3.339115000  | 1                                  | 0.025132000  | 4.028939000  | -0.314490000 |
| 1                                                        | -5.411657000 | -1.451257000 | 1.854312000  | 1                                  | 1.175823000  | 4.219132000  | -1.666032000 |
| 1                                                        | -4.323476000 | -2.571252000 | 2.729597000  | 1                                  | -0.522265000 | 3.758577000  | -1.996875000 |

|                                                           |              |              |              |   |             |              |              |
|-----------------------------------------------------------|--------------|--------------|--------------|---|-------------|--------------|--------------|
| 6                                                         | -1.763709000 | 2.742907000  | -0.714345000 | 6 | 4.070979000 | 0.308324000  | 0.507531000  |
| 8                                                         | -2.257592000 | 3.043057000  | -1.797323000 | 8 | 5.055990000 | 0.696554000  | -0.107468000 |
| 8                                                         | -1.201587000 | 3.659508000  | 0.118485000  | 8 | 4.025751000 | 0.264521000  | 1.863307000  |
| 6                                                         | -1.214358000 | 5.027651000  | -0.336821000 | 6 | 5.200958000 | 0.723669000  | 2.561218000  |
| 1                                                         | -0.668780000 | 5.125915000  | -1.276068000 | 1 | 6.071876000 | 0.130201000  | 2.280294000  |
| 1                                                         | -2.237561000 | 5.381180000  | -0.468913000 | 1 | 5.390322000 | 1.775784000  | 2.345051000  |
| 1                                                         | -0.718889000 | 5.594823000  | 0.447851000  | 1 | 4.979305000 | 0.591029000  | 3.617784000  |
| 8                                                         | -2.225361000 | -3.066110000 | -1.451685000 | 8 | 2.124698000 | -2.703590000 | -1.302768000 |
| 6                                                         | -1.931319000 | -4.469672000 | -1.308597000 | 6 | 2.820421000 | -3.462955000 | -2.300848000 |
| 1                                                         | -0.892392000 | -4.541217000 | -0.990318000 | 1 | 2.083351000 | -4.075941000 | -2.818864000 |
| 1                                                         | -2.573455000 | -4.927972000 | -0.552844000 | 1 | 3.311863000 | -2.806842000 | -3.025070000 |
| 1                                                         | -2.052814000 | -4.988919000 | -2.261875000 | 1 | 3.565974000 | -4.115970000 | -1.839346000 |
| 1                                                         | -3.142346000 | -2.963611000 | -1.732394000 | 1 | 2.736212000 | -2.067795000 | -0.837056000 |
| <b>TS16</b>                                               |              |              |              |   |             |              |              |
| V <sub>im.</sub> = -1218.4 cm <sup>-1</sup> (-1216.85351) |              |              |              |   |             |              |              |
| 7                                                         | -1.665145000 | -0.049044000 | -0.683757000 |   |             |              |              |
| 6                                                         | -0.504550000 | -0.572982000 | -0.403902000 |   |             |              |              |
| 6                                                         | -2.548439000 | -0.582908000 | 0.241692000  |   |             |              |              |
| 6                                                         | -1.868946000 | -1.453940000 | 1.065567000  |   |             |              |              |
| 7                                                         | -0.557992000 | -1.444161000 | 0.646046000  |   |             |              |              |
| 1                                                         | -2.167248000 | -2.077084000 | 1.890672000  |   |             |              |              |
| 7                                                         | 0.440920000  | -2.256509000 | 1.210673000  |   |             |              |              |
| 1                                                         | 1.070866000  | -1.670599000 | 1.752925000  |   |             |              |              |
| 1                                                         | 0.974260000  | -2.691056000 | 0.452606000  |   |             |              |              |
| 7                                                         | 0.694199000  | -0.339528000 | -1.177841000 |   |             |              |              |
| 1                                                         | 0.398383000  | 0.169955000  | -2.014850000 |   |             |              |              |
| 1                                                         | 1.140052000  | -1.308353000 | -1.463528000 |   |             |              |              |
| 6                                                         | -3.972132000 | -0.218384000 | 0.250757000  |   |             |              |              |
| 6                                                         | -4.499614000 | 0.609544000  | -0.751780000 |   |             |              |              |
| 6                                                         | -4.835960000 | -0.687873000 | 1.253687000  |   |             |              |              |
| 6                                                         | -5.849284000 | 0.955072000  | -0.751958000 |   |             |              |              |
| 6                                                         | -6.184370000 | -0.342811000 | 1.250111000  |   |             |              |              |
| 6                                                         | -6.699212000 | 0.480863000  | 0.247256000  |   |             |              |              |
| 1                                                         | -3.843835000 | 0.978592000  | -1.530380000 |   |             |              |              |
| 1                                                         | -4.455404000 | -1.323351000 | 2.045244000  |   |             |              |              |
| 1                                                         | -6.237626000 | 1.595895000  | -1.535871000 |   |             |              |              |
| 1                                                         | -6.834184000 | -0.715687000 | 2.033938000  |   |             |              |              |
| 1                                                         | -7.749263000 | 0.749995000  | 0.246535000  |   |             |              |              |
| 6                                                         | 1.829669000  | 0.397346000  | -0.495965000 |   |             |              |              |
| 6                                                         | 2.919455000  | -0.318407000 | -0.235324000 |   |             |              |              |
| 6                                                         | 1.631454000  | 1.856632000  | -0.298105000 |   |             |              |              |
| 8                                                         | 2.367732000  | 2.550768000  | 0.368343000  |   |             |              |              |
| 8                                                         | 0.570258000  | 2.311781000  | -0.978036000 |   |             |              |              |
| 6                                                         | 0.290026000  | 3.728904000  | -0.886566000 |   |             |              |              |
| 1                                                         | 0.108410000  | 4.005675000  | 0.151448000  |   |             |              |              |
| 1                                                         | 1.127869000  | 4.300758000  | -1.284437000 |   |             |              |              |
| 1                                                         | -0.601562000 | 3.884226000  | -1.487463000 |   |             |              |              |
| 6                                                         | 4.146952000  | 0.221525000  | 0.341742000  |   |             |              |              |
| 8                                                         | 5.080794000  | 0.646089000  | -0.316294000 |   |             |              |              |
| 8                                                         | 4.183916000  | 0.076319000  | 1.680572000  |   |             |              |              |
| 6                                                         | 5.403755000  | 0.480673000  | 2.341789000  |   |             |              |              |
| 1                                                         | 6.249804000  | -0.093850000 | 1.964096000  |   |             |              |              |
| 1                                                         | 5.583049000  | 1.545216000  | 2.189844000  |   |             |              |              |
| 1                                                         | 5.241991000  | 0.270253000  | 3.396013000  |   |             |              |              |
| 8                                                         | 2.061413000  | -2.500119000 | -1.231817000 |   |             |              |              |
| 6                                                         | 2.743905000  | -3.198250000 | -2.266807000 |   |             |              |              |
| 1                                                         | 2.018721000  | -3.685758000 | -2.924705000 |   |             |              |              |
| 1                                                         | 3.354119000  | -2.517281000 | -2.873613000 |   |             |              |              |
| 1                                                         | 3.400034000  | -3.968373000 | -1.846385000 |   |             |              |              |
| 1                                                         | 2.708518000  | -1.633217000 | -0.723235000 |   |             |              |              |

**Table S19. Optimized geometries of stationary points of the Scheme 16. PCM/B3LYP/6-311++G(d,p) calculations (Methanol, 64.7 °C). Coordinates in Angstroms. Sum of electronic and thermal Free Energies in a.u. are in parentheses.**

|                                                          |             |              |              |                                    |             |             |             |
|----------------------------------------------------------|-------------|--------------|--------------|------------------------------------|-------------|-------------|-------------|
| <b>TS17</b>                                              |             |              |              | <b>66</b>                          |             |             |             |
| V <sub>im.</sub> = -161.3 cm <sup>-1</sup> (-1216.84290) |             |              |              | V <sub>im.</sub> = 0 (-1216.85589) |             |             |             |
| 7                                                        | 2.533873000 | -1.255072000 | -1.140898000 | 7                                  | 2.360133000 | 1.721061000 | 0.434603000 |
| 6                                                        | 1.263013000 | -1.360246000 | -1.449212000 | 6                                  | 1.138601000 | 2.022666000 | 0.789215000 |
| 6                                                        | 2.669619000 | -0.061718000 | -0.437089000 | 6                                  | 2.363400000 | 0.360942000 | 0.125659000 |

|                                                              |              |              |              |   |              |              |              |
|--------------------------------------------------------------|--------------|--------------|--------------|---|--------------|--------------|--------------|
| 6                                                            | 1.447482000  | 0.555811000  | -0.320452000 | 6 | 1.106236000  | -0.162757000 | 0.287906000  |
| 7                                                            | 0.563871000  | -0.271957000 | -0.995246000 | 7 | 0.330344000  | 0.913305000  | 0.702866000  |
| 1                                                            | 1.122980000  | 1.471638000  | 0.142266000  | 1 | 0.677380000  | -1.133933000 | 0.115108000  |
| 7                                                            | -0.813818000 | -0.074416000 | -1.151956000 | 7 | -0.988908000 | 0.828885000  | 1.232724000  |
| 1                                                            | -1.095017000 | -0.512232000 | -2.031906000 | 1 | -1.201078000 | 1.767336000  | 1.594896000  |
| 1                                                            | -1.008140000 | 0.941528000  | -1.222589000 | 1 | -0.992608000 | 0.146645000  | 2.052429000  |
| 7                                                            | 0.630542000  | -2.336691000 | -2.201658000 | 7 | 0.637655000  | 3.216742000  | 1.281614000  |
| 1                                                            | 1.295262000  | -2.994497000 | -2.590062000 | 1 | 1.378364000  | 3.873031000  | 1.496230000  |
| 1                                                            | -0.094791000 | -2.830200000 | -1.689308000 | 1 | -0.055223000 | 3.650957000  | 0.680423000  |
| 6                                                            | 3.972411000  | 0.387540000  | 0.070283000  | 6 | 3.585669000  | -0.316402000 | -0.329557000 |
| 6                                                            | 5.149932000  | -0.268949000 | -0.320782000 | 6 | 4.768840000  | 0.413343000  | -0.519477000 |
| 6                                                            | 4.077825000  | 1.476990000  | 0.951715000  | 6 | 3.603973000  | -1.698193000 | -0.582170000 |
| 6                                                            | 6.391385000  | 0.152413000  | 0.151227000  | 6 | 5.933721000  | -0.219135000 | -0.949430000 |
| 6                                                            | 5.319141000  | 1.897794000  | 1.419257000  | 6 | 4.767800000  | -2.326906000 | -1.013623000 |
| 6                                                            | 6.484132000  | 1.237725000  | 1.022403000  | 6 | 5.940002000  | -1.590940000 | -1.199851000 |
| 1                                                            | 5.082156000  | -1.110292000 | -0.998839000 | 1 | 4.766207000  | 1.478912000  | -0.328430000 |
| 1                                                            | 3.185112000  | 1.995956000  | 1.282308000  | 1 | 2.706773000  | -2.289707000 | -0.439335000 |
| 1                                                            | 7.288790000  | -0.368459000 | -0.164302000 | 1 | 6.837836000  | 0.362735000  | -1.090624000 |
| 1                                                            | 5.377281000  | 2.740078000  | 2.099751000  | 1 | 4.760772000  | -3.394454000 | -1.203053000 |
| 1                                                            | 7.450112000  | 1.565021000  | 1.389661000  | 1 | 6.846058000  | -2.082449000 | -1.535284000 |
| 6                                                            | -3.292356000 | -0.000350000 | -0.329991000 | 6 | -2.552086000 | -0.857659000 | 0.473123000  |
| 6                                                            | -2.224617000 | -0.551119000 | 0.038144000  | 6 | -2.041255000 | 0.347694000  | 0.254209000  |
| 6                                                            | -4.688809000 | 0.098007000  | -0.089082000 | 6 | -3.608022000 | -1.441242000 | -0.317151000 |
| 8                                                            | -5.529555000 | -0.698235000 | -0.481882000 | 8 | -4.801585000 | -1.344976000 | -0.060990000 |
| 8                                                            | -4.994410000 | 1.228296000  | 0.598559000  | 8 | -3.132300000 | -2.236059000 | -1.308439000 |
| 6                                                            | -6.385527000 | 1.421990000  | 0.931341000  | 6 | -4.112045000 | -2.965016000 | -2.075335000 |
| 1                                                            | -7.005211000 | 1.379788000  | 0.035771000  | 1 | -4.688524000 | -3.629567000 | -1.430636000 |
| 1                                                            | -6.715738000 | 0.664725000  | 1.643679000  | 1 | -4.786105000 | -2.279373000 | -2.590051000 |
| 1                                                            | -6.437742000 | 2.410184000  | 1.382164000  | 1 | -3.540456000 | -3.543382000 | -2.797653000 |
| 6                                                            | -1.705872000 | -1.476515000 | 1.056417000  | 6 | -2.394360000 | 1.332889000  | -0.797413000 |
| 8                                                            | -2.175961000 | -1.537666000 | 2.171823000  | 8 | -3.126474000 | 1.092072000  | -1.730381000 |
| 8                                                            | -0.724991000 | -2.269346000 | 0.608372000  | 8 | -1.835160000 | 2.545099000  | -0.583856000 |
| 6                                                            | -0.191730000 | -3.230954000 | 1.554868000  | 6 | -2.164842000 | 3.579079000  | -1.546417000 |
| 1                                                            | 0.217681000  | -2.711534000 | 2.420373000  | 1 | -1.812684000 | 3.290431000  | -2.535932000 |
| 1                                                            | -0.976345000 | -3.919036000 | 1.867073000  | 1 | -3.241798000 | 3.739827000  | -1.564295000 |
| 1                                                            | 0.591522000  | -3.758626000 | 1.017965000  | 1 | -1.651452000 | 4.473367000  | -1.203767000 |
| 8                                                            | -1.832989000 | 2.601785000  | -1.315220000 | 8 | -1.393651000 | -1.122261000 | 3.038015000  |
| 6                                                            | -1.546446000 | 3.697636000  | -0.431822000 | 6 | -0.537774000 | -2.146224000 | 3.564641000  |
| 1                                                            | -0.592028000 | 4.116818000  | -0.748091000 | 1 | 0.065841000  | -1.694173000 | 4.351135000  |
| 1                                                            | -2.316927000 | 4.469597000  | -0.504936000 | 1 | -1.131013000 | -2.958166000 | 3.993381000  |
| 1                                                            | -1.464940000 | 3.361975000  | 0.606105000  | 1 | 0.124549000  | -2.549590000 | 2.793156000  |
| 1                                                            | -2.679547000 | 2.199528000  | -1.065340000 | 1 | -1.911195000 | -1.452232000 | 2.258887000  |
| <b>TS18</b>                                                  |              |              |              |   |              |              |              |
| <b>v<sub>im.</sub> = -1184.1cm<sup>-1</sup>(-1216.85595)</b> |              |              |              |   |              |              |              |
| 7                                                            | 2.388849000  | 1.684526000  | 0.454315000  |   |              |              |              |
| 6                                                            | 1.164014000  | 1.976981000  | 0.814916000  |   |              |              |              |
| 6                                                            | 2.398345000  | 0.324164000  | 0.152852000  |   |              |              |              |
| 6                                                            | 1.146397000  | -0.206352000 | 0.336363000  |   |              |              |              |
| 7                                                            | 0.362594000  | 0.864110000  | 0.748208000  |   |              |              |              |
| 1                                                            | 0.731147000  | -1.186701000 | 0.183801000  |   |              |              |              |
| 7                                                            | -0.947759000 | 0.768107000  | 1.289165000  |   |              |              |              |
| 1                                                            | -1.139486000 | 1.677803000  | 1.719741000  |   |              |              |              |
| 1                                                            | -1.003924000 | -0.093287000 | 2.148341000  |   |              |              |              |
| 7                                                            | 0.669291000  | 3.174122000  | 1.304814000  |   |              |              |              |
| 1                                                            | 1.406032000  | 3.854184000  | 1.444917000  |   |              |              |              |
| 1                                                            | -0.079674000 | 3.567541000  | 0.744499000  |   |              |              |              |
| 6                                                            | 3.620090000  | -0.351908000 | -0.304448000 |   |              |              |              |
| 6                                                            | 4.848082000  | 0.327261000  | -0.300764000 |   |              |              |              |
| 6                                                            | 3.595521000  | -1.684789000 | -0.748302000 |   |              |              |              |
| 6                                                            | 6.014659000  | -0.308068000 | -0.721752000 |   |              |              |              |
| 6                                                            | 4.762006000  | -2.317430000 | -1.167018000 |   |              |              |              |
| 6                                                            | 5.979275000  | -1.632945000 | -1.155971000 |   |              |              |              |
| 1                                                            | 4.879075000  | 1.355641000  | 0.036405000  |   |              |              |              |
| 1                                                            | 2.659996000  | -2.232166000 | -0.773316000 |   |              |              |              |
| 1                                                            | 6.953692000  | 0.234311000  | -0.709861000 |   |              |              |              |
| 1                                                            | 4.720507000  | -3.346452000 | -1.506397000 |   |              |              |              |
| 1                                                            | 6.886864000  | -2.126608000 | -1.484116000 |   |              |              |              |
| 6                                                            | -2.644507000 | -0.767248000 | 0.560032000  |   |              |              |              |
| 6                                                            | -2.007828000 | 0.376605000  | 0.305875000  |   |              |              |              |
| 6                                                            | -3.755948000 | -1.284375000 | -0.223321000 |   |              |              |              |
| 8                                                            | -4.929788000 | -1.047838000 | 0.012844000  |   |              |              |              |
| 8                                                            | -3.352099000 | -2.168767000 | -1.159687000 |   |              |              |              |
| 6                                                            | -4.391187000 | -2.828120000 | -1.915340000 |   |              |              |              |



|   |              |              |              |
|---|--------------|--------------|--------------|
| 1 | -5.046632000 | -3.392433000 | -1.251336000 |
| 1 | -4.975772000 | -2.098778000 | -2.476701000 |
| 1 | -3.871045000 | -3.499203000 | -2.594532000 |
| 6 | -2.288472000 | 1.327101000  | -0.801912000 |
| 8 | -3.011891000 | 1.073177000  | -1.739121000 |
| 8 | -1.678449000 | 2.517779000  | -0.634644000 |
| 6 | -1.929673000 | 3.513496000  | -1.659286000 |
| 1 | -1.582003000 | 3.148479000  | -2.624820000 |
| 1 | -2.994279000 | 3.738712000  | -1.705142000 |
| 1 | -1.365804000 | 4.391737000  | -1.356630000 |
| 8 | -1.464382000 | -1.119229000 | 2.804196000  |
| 6 | -0.622503000 | -2.235653000 | 3.128006000  |
| 1 | 0.223553000  | -1.880948000 | 3.718090000  |
| 1 | -1.191221000 | -2.957909000 | 3.717220000  |
| 1 | -0.248518000 | -2.726619000 | 2.224384000  |
| 1 | -2.110086000 | -1.276653000 | 1.901655000  |
